# Supplementary material for: RNF213 Loss-of-Function Promotes Angiogenesis of Cerebral Microvascular Endothelial Cells in a Cellular State Dependent Manner
Source: Cells. 2022 Dec 24;12(1):78. doi: 10.3390/cells12010078 (PMC9818782; doi:10.3390/cells12010078)
Supplement: Supplementary file 1 [file cells-12-00078-s001.zip]

Archive with 5 entries (5 files):
- SupplementaryFigures_RNF213angio_revision (optimis¿a).pdf
- Table S1.xlsx
- Table S2.xlsx
- Table S3.xlsx
- Table S4.xlsx
