# Supplementary material for: RNF213 Loss-of-Function Promotes Angiogenesis of Cerebral Microvascular Endothelial Cells in a Cellular State Dependent Manner
Source: Cells. 2022 Dec 24;12(1):78. doi: 10.3390/cells12010078 (PMC9818782; doi:10.3390/cells12010078)
Supplement: Supplementary file 1 [file cells-12-00078-s001.zip › Table S1.xlsx]

## Sheet: Feuil1
Table S1: Most significantly up-regulated genes in proliferative RNF213-deficient hCMEC/D3
Symbols	Name	Log (Fold Change)	Ajusted p-value
PTPN13	protein tyrosine phosphatase non-receptor type 13	6.426	7.4936e-07
EYA4	EYA transcriptional coactivator and phosphatase 4	6.2933	0.0013637
TMEFF2	transmembrane protein with EGF like and two follistatin like domains 2	6.0403	0.00141
TNFAIP6	TNF alpha induced protein 6	5.9514	0.01332
KIAA0408	KIAA0408	5.6618	9.7473e-05
CD24	CD24 molecule	5.5124	1.813e-05
SLC4A4	solute carrier family 4 member 4	5.4059	5.6655e-05
FAM155A	family with sequence similarity 155 member A	5.2627	9.3119e-05
SOGA3	SOGA family member 3	4.9456	0.0011627
POPDC3	popeye domain containing 3	4.926	0.00012249
PEG10	paternally expressed 10	4.8501	0.0045637
CCNA1	cyclin A1	4.8249	2.5528e-05
FZD7	frizzled class receptor 7	4.7225	8.8087e-05
SERPINB7	serpin family B member 7	4.6385	0.00013907
HLA-DRB5	"major histocompatibility complex, class II, DR beta 5"	4.6378	0.020442
SERPINB2	serpin family B member 2	4.6089	0.0010968
EREG	epiregulin	4.5942	0.0069148
CLGN	calmegin	4.5237	0.0002434
LUM	lumican	4.5063	0.0010603
MEIS2	Meis homeobox 2	4.4332	0.00020388
QRFPR	pyroglutamylated RFamide peptide receptor	4.4205	0.00094757
CPE	carboxypeptidase E	4.3983	0.03313
CNIH3	cornichon family AMPA receptor auxiliary protein 3	4.396	0.03063
PRKAA2	protein kinase AMP-activated catalytic subunit alpha 2	4.359	1.1596e-05
CPZ	carboxypeptidase Z	4.3571	4.7243e-05
VNN1	vanin 1	4.3161	0.015323
CCL20	C-C motif chemokine ligand 20	4.2734	0.0014558
SLC39A8	solute carrier family 39 member 8	4.2695	0.00012249
LAMA1	laminin subunit alpha 1	4.1931	0.0045113
ANKRD29	ankyrin repeat domain 29	4.1433	0.010568
NBEA	neurobeachin	4.1428	0.00028617
LIN7A	"lin-7 homolog A, crumbs cell polarity complex component"	4.106	0.00039307
COL6A1	collagen type VI alpha 1 chain	4.0528	0.0082927
ANTXR2	ANTXR cell adhesion molecule 2	4.041	0.0018486
TMEM200A	transmembrane protein 200A	4.0209	0.0020361
SLAIN1	SLAIN motif family member 1	3.9971	0.0043017
CYP2J2	cytochrome P450 family 2 subfamily J member 2	3.9293	0.0026737
ACSS3	acyl-CoA synthetase short chain family member 3	3.9266	0.00054074
TOX2	TOX high mobility group box family member 2	3.8971	1.1596e-05
CH25H	cholesterol 25-hydroxylase	3.8529	0.039317
FOLR3	folate receptor gamma	3.8402	0.00029437
UST	uronyl 2-sulfotransferase	3.8134	0.02566
MAN1A1	mannosidase alpha class 1A member 1	3.788	0.040298
TDO2	"tryptophan 2,3-dioxygenase"	3.7722	0.00042068
CYP1B1	cytochrome P450 family 1 subfamily B member 1	3.7502	0.032893
LINC00707	long intergenic non-protein coding RNA 707	3.7261	0.0082927
ALX1	ALX homeobox 1	3.7146	4.8274e-05
PTPRN2	protein tyrosine phosphatase receptor type N2	3.7123	1.7061e-05
BANK1	B cell scaffold protein with ankyrin repeats 1	3.7064	9.7473e-05
EPGN	epithelial mitogen	3.7005	0.00018396
DPY19L2P1	DPY19L2 pseudogene 1	3.6943	2.0189e-05
HLA-DMB	"major histocompatibility complex, class II, DM beta"	3.6935	0.02221
FOXD1	forkhead box D1	3.6896	0.00058971
DOCK11	dedicator of cytokinesis 11	3.6878	0.005006
DCN	decorin	3.6648	0.011071
PRDM1	PR/SET domain 1	3.5773	0.00098648
MYPN	myopalladin	3.5674	4.8274e-05
PAMR1	peptidase domain containing associated with muscle regeneration 1	3.5431	0.0097706
KCNMB4	potassium calcium-activated channel subfamily M regulatory beta subunit 4	3.5382	0.0078843
GPR1	G protein-coupled receptor 1	3.5381	0.0023806
PRSS12	serine protease 12	3.5215	0.024133
MOXD1	monooxygenase DBH like 1	3.5182	0.045244
DMBT1	deleted in malignant brain tumors 1	3.5061	5.6655e-05
TRIM36	tripartite motif containing 36	3.478	3.4594e-05
BHMT2	betaine--homocysteine S-methyltransferase 2	3.4709	0.0016794
FOSL1	"FOS like 1, AP-1 transcription factor subunit"	3.4376	0.00028373
CHMP4C	charged multivesicular body protein 4C	3.4347	0.00037106
PTGES	prostaglandin E synthase	3.4161	0.00035785
KRTAP2-3	keratin associated protein 2-3	3.4006	0.00028373
TCF21	transcription factor 21	3.3722	0.0014609
ADAMTS3	ADAM metallopeptidase with thrombospondin type 1 motif 3	3.3548	0.0013976
SLC16A2	solute carrier family 16 member 2	3.3491	0.00069708
AFP	alpha fetoprotein	3.3473	0.0013711
FRZB	frizzled related protein	3.3202	0.00012149
KRTAP1-5	keratin associated protein 1-5	3.2995	2.5528e-05
DDIT4L	DNA damage inducible transcript 4 like	3.2968	0.0012569
SEMA7A	semaphorin 7A (John Milton Hagen blood group)	3.2928	0.00096813
MAP1A	microtubule associated protein 1A	3.2695	0.0019222
TIGD2	tigger transposable element derived 2	3.2666	0.00016103
SLC25A27	solute carrier family 25 member 27	3.2605	0.00052133
TNFRSF6B	TNF receptor superfamily member 6b	3.26	7.9379e-05
GEM	GTP binding protein overexpressed in skeletal muscle	3.2559	0.0093786
PNPLA3	patatin like phospholipase domain containing 3	3.2458	0.0013711
BMPER	BMP binding endothelial regulator	3.2346	0.00063731
FDCSP	follicular dendritic cell secreted protein	3.2275	0.0093999
NMU	neuromedin U	3.207	0.037453
SERPINE2	serpin family E member 2	3.1974	0.0080504
CD163L1	CD163 molecule like 1	3.192	0.00028617
NPTX1	neuronal pentraxin 1	3.1913	0.0019707
GGT8P	gamma-glutamyltransferase 8 pseudogene	3.1889	0.0015843
GALNT5	polypeptide N-acetylgalactosaminyltransferase 5	3.1794	0.0071355
TSPAN12	tetraspanin 12	3.1585	0.00089567
LRAT	lecithin retinol acyltransferase	3.1194	0.0078587
EPHA5	EPH receptor A5	3.1172	0.006335
PRDM8	PR/SET domain 8	3.1145	0.040407
CCL26	C-C motif chemokine ligand 26	3.0999	0.001761
HMSD	histocompatibility minor serpin domain containing	3.0927	0.00021061
KRT34	keratin 34	3.0796	9.7473e-05
CPA4	carboxypeptidase A4	3.057	0.022535
NMNAT2	nicotinamide nucleotide adenylyltransferase 2	3.0492	0.0020361
DNER	delta/notch like EGF repeat containing	3.0471	0.00023106
FHOD3	formin homology 2 domain containing 3	3.0453	0.001267
TM4SF19	transmembrane 4 L six family member 19	3.045	0.0018859
GXYLT2	glucoside xylosyltransferase 2	3.0349	8.4617e-05
STAMBPL1	STAM binding protein like 1	3.0082	0.013541
LAMA2	laminin subunit alpha 2	2.9937	0.00079771
UCHL1	ubiquitin C-terminal hydrolase L1	2.9878	0.015817
STEAP3	STEAP3 metalloreductase	2.9874	8.0727e-05
EPHA5-AS1	EPHA5 antisense RNA 1	2.9823	9.7473e-05
PPP4R4	protein phosphatase 4 regulatory subunit 4	2.9818	0.010568
ARHGEF26	Rho guanine nucleotide exchange factor 26	2.9592	0.00012249
GRTP1	growth hormone regulated TBC protein 1	2.9585	0.0027026
LRP1	LDL receptor related protein 1	2.9502	0.00086378
WWC1	WW and C2 domain containing 1	2.9296	0.038045
SLC16A14	solute carrier family 16 member 14	2.9192	0.00030178
CORO2B	coronin 2B	2.9005	0.00079141
G0S2	G0/G1 switch 2	2.8933	0.014698
TRNP1	TMF1 regulated nuclear protein 1	2.8897	0.0079732
PFN2	profilin 2	2.8854	0.010578
PPP1R9A	protein phosphatase 1 regulatory subunit 9A	2.8582	0.0046301
SNAI2	snail family transcriptional repressor 2	2.8526	0.0034763
LINC01116	long intergenic non-protein coding RNA 1116	2.8469	0.045562
VCAN	versican	2.8316	0.00051209
TNFAIP2	TNF alpha induced protein 2	2.8207	0.005424
PRICKLE2	prickle planar cell polarity protein 2	2.8173	0.0016686
RHOU	ras homolog family member U	2.8158	0.040171
ITGA4	integrin subunit alpha 4	2.8118	0.0061211
ARSI	arylsulfatase family member I	2.7831	0.000308
SLC9A9	solute carrier family 9 member A9	2.7697	0.0019222
SYCP2	synaptonemal complex protein 2	2.7607	0.00079944
TTLL7	tubulin tyrosine ligase like 7	2.7554	0.0060643
AGTR1	angiotensin II receptor type 1	2.7454	0.0061776
BTC	betacellulin	2.7413	0.019467
SRPX	sushi repeat containing protein X-linked	2.7412	0.021423
COCH	cochlin	2.7388	0.00015688
AMPD3	adenosine monophosphate deaminase 3	2.7329	0.0043721
PLA2G4A	phospholipase A2 group IVA	2.7097	0.010413
CAMK2N1	calcium/calmodulin dependent protein kinase II inhibitor 1	2.6981	0.0034491
FGF14-AS2	FGF14 antisense RNA 2	2.693	0.00063031
PLCB4	phospholipase C beta 4	2.6795	0.0022116
RRAD	"RRAD, Ras related glycolysis inhibitor and calcium channel regulator"	2.6752	0.0043197
GATA6	GATA binding protein 6	2.6741	0.00032668
GNG2	G protein subunit gamma 2	2.6703	0.023428
E2F5	E2F transcription factor 5	2.6644	0.030441
CPED1	cadherin like and PC-esterase domain containing 1	2.6642	0.011701
SATB1	SATB homeobox 1	2.6609	0.01071
CCND1	cyclin D1	2.6195	0.003833
EVC	EvC ciliary complex subunit 1	2.616	0.00038825
NRIP3	nuclear receptor interacting protein 3	2.6056	2.6555e-05
LAMB3	laminin subunit beta 3	2.5985	0.0019339
STK26	serine/threonine kinase 26	2.592	0.039422
RUNX2	RUNX family transcription factor 2	2.5788	0.032228
LINC00525	long intergenic non-protein coding RNA 525	2.5756	0.0023006
GSAP	gamma-secretase activating protein	2.5709	0.019133
PLCL2	phospholipase C like 2	2.5696	0.00089809
CDA	cytidine deaminase	2.5658	0.0019028
BMP2	bone morphogenetic protein 2	2.5558	0.0002214
COL24A1	collagen type XXIV alpha 1 chain	2.5518	0.0080504
ZCCHC24	zinc finger CCHC-type containing 24	2.5505	0.028648
AKR1C1	aldo-keto reductase family 1 member C1	2.5498	3.4938e-05
ARHGEF6	Rac/Cdc42 guanine nucleotide exchange factor 6	2.5278	0.0018152
PTGFR	prostaglandin F receptor	2.5258	0.035148
PRKCQ-AS1	PRKCQ antisense RNA 1	2.5246	0.0015877
CDS1	CDP-diacylglycerol synthase 1	2.5167	0.00025317
RDH5	retinol dehydrogenase 5	2.5149	0.0023104
PAK1	p21 (RAC1) activated kinase 1	2.4975	0.00017147
TANC2	"tetratricopeptide repeat, ankyrin repeat and coiled-coil containing 2"	2.4942	0.0026454
SLN	sarcolipin	2.4902	0.019468
TMEM47	transmembrane protein 47	2.4899	0.016048
TRPC3	transient receptor potential cation channel subfamily C member 3	2.482	0.023886
CD68	CD68 molecule	2.4711	0.00079771
F2RL2	coagulation factor II thrombin receptor like 2	2.4708	0.034404
SH3PXD2A	SH3 and PX domains 2A	2.4698	0.0018152
TNFRSF9	TNF receptor superfamily member 9	2.449	0.043023
CAMK4	calcium/calmodulin dependent protein kinase IV	2.4358	0.00029437
WIPF1	WAS/WASL interacting protein family member 1	2.4292	0.00048738
KLRC3	killer cell lectin like receptor C3	2.4245	0.02153
FST	follistatin	2.4178	0.0087943
LINC00473	long intergenic non-protein coding RNA 473	2.4081	0.0012369
LAYN	layilin	2.4047	0.0094446
TNFSF4	TNF superfamily member 4	2.3985	8.8087e-05
P2RY6	pyrimidinergic receptor P2Y6	2.3899	0.00017426
BCL2A1	BCL2 related protein A1	2.3823	0.017778
FAM167A	family with sequence similarity 167 member A	2.382	0.012663
FAM171B	family with sequence similarity 171 member B	2.3756	0.0030468
TTC39C	tetratricopeptide repeat domain 39C	2.3751	0.0014267
HTR7	5-hydroxytryptamine receptor 7	2.3639	0.012295
SAMD12	sterile alpha motif domain containing 12	2.3635	0.0021694
PARP8	poly(ADP-ribose) polymerase family member 8	2.3553	0.0048344
PIK3CG	"phosphatidylinositol-4,5-bisphosphate 3-kinase catalytic subunit gamma"	2.3541	0.0042411
VWDE	von Willebrand factor D and EGF domains	2.3444	0.0032316
LOC100144595	uncharacterized LOC100144595	2.3394	0.00047828
STXBP5-AS1	STXBP5 antisense RNA 1	2.3207	0.012498
FRMD5	FERM domain containing 5	2.3186	0.019491
CD40	CD40 molecule	2.3172	0.014837
THSD7A	thrombospondin type 1 domain containing 7A	2.3156	0.038797
TPBG	trophoblast glycoprotein	2.3069	0.0023309
CLDN23	claudin 23	2.2818	0.0057446
HDAC9	histone deacetylase 9	2.2677	0.034503
VNN2	vanin 2	2.2633	0.015675
SYNPO2L	synaptopodin 2 like	2.2556	0.00019448
ENOX1	ecto-NOX disulfide-thiol exchanger 1	2.2546	0.00074915
XK	X-linked Kx blood group	2.2502	0.011309
CREB5	cAMP responsive element binding protein 5	2.2431	0.00010719
HMGA2	high mobility group AT-hook 2	2.238	0.00042979
SLC40A1	solute carrier family 40 member 1	2.2282	0.013182
PLAUR	"plasminogen activator, urokinase receptor"	2.2202	0.0012569
GALNT3	polypeptide N-acetylgalactosaminyltransferase 3	2.2063	0.010568
RGS2	regulator of G protein signaling 2	2.1969	0.0083797
BEX1	brain expressed X-linked 1	2.1962	0.022455
OSBPL6	oxysterol binding protein like 6	2.1939	0.0030708
WDR66	WD repeat domain 66	2.1886	0.0018224
C11orf68	chromosome 11 open reading frame 68	2.1884	0.00097028
FTCDNL1	formiminotransferase cyclodeaminase N-terminal like	2.1874	0.0028158
SOHLH2	spermatogenesis and oogenesis specific basic helix-loop-helix 2	2.1834	0.00012249
CPA3	carboxypeptidase A3	2.172	0.022453
LRRC63	leucine rich repeat containing 63	2.1704	0.003389
NPFFR2	neuropeptide FF receptor 2	2.1703	0.037383
BEX4	brain expressed X-linked 4	2.16	0.010949
SSPN	sarcospan	2.1514	0.0051846
TXK	TXK tyrosine kinase	2.1405	0.018366
TFPI2	tissue factor pathway inhibitor 2	2.1374	0.027503
SALL4	spalt like transcription factor 4	2.1349	0.0023129
ODF3L1	outer dense fiber of sperm tails 3 like 1	2.1348	0.0031561
ACOT12	acyl-CoA thioesterase 12	2.1325	0.0080867
BEST1	bestrophin 1	2.1267	0.0087582
CCDC169	coiled-coil domain containing 169	2.1208	0.0024916
TBC1D8B	TBC1 domain family member 8B	2.1155	0.00023081
SNCA	synuclein alpha	2.1097	0.0038718
SPANXC	SPANX family member C	2.1069	0.021751
TRIM2	tripartite motif containing 2	2.0982	0.00065037
SLC37A2	solute carrier family 37 member 2	2.0959	0.0023789
STC1	stanniocalcin 1	2.08	0.0057784
SPATA13	spermatogenesis associated 13	2.0776	0.0010703
FNDC4	fibronectin type III domain containing 4	2.0693	0.0042312
RBM47	RNA binding motif protein 47	2.0654	0.0015598
PITPNC1	phosphatidylinositol transfer protein cytoplasmic 1	2.0636	0.00074915
GNGT2	G protein subunit gamma transducin 2	2.0619	0.018848
NAT16	N-acetyltransferase 16 (putative)	2.0612	0.03996
IL1R1	interleukin 1 receptor type 1	2.0589	0.012242
MMP16	matrix metallopeptidase 16	2.0575	0.022866
EVC2	EvC ciliary complex subunit 2	2.0523	0.0018447
PID1	phosphotyrosine interaction domain containing 1	2.052	0.0067186
SPATA4	spermatogenesis associated 4	2.0519	0.0044045
RNF24	ring finger protein 24	2.0516	0.00091878
SH2D4A	SH2 domain containing 4A	2.0508	0.0036396
NIPAL3	NIPA like domain containing 3	2.0506	0.0088571
STAT4	signal transducer and activator of transcription 4	2.0433	0.003329
LINC01096	long intergenic non-protein coding RNA 1096	2.0422	0.018423
EMP1	epithelial membrane protein 1	2.0402	0.000308
AZIN2	antizyme inhibitor 2	2.0367	0.00029437
AKR1C3	aldo-keto reductase family 1 member C3	2.0286	0.00023106
CTSO	cathepsin O	2.0237	0.018678
NRP2	neuropilin 2	2.0235	0.012708
C6orf99	chromosome 6 open reading frame 99	2.0219	0.019448
SYT1	synaptotagmin 1	2.0183	0.0043251
C2orf27A	chromosome 2 open reading frame 27A	1.9951	0.00080652
CDC14B	cell division cycle 14B	1.9945	0.011583
SMIM3	small integral membrane protein 3	1.9915	0.0024644
OAF	out at first homolog	1.9897	0.045528
ALB	albumin	1.9889	0.0041977
LAD1	ladinin 1	1.9874	0.0064844
ELOVL4	ELOVL fatty acid elongase 4	1.9872	0.0012443
TMEM158	transmembrane protein 158 (gene/pseudogene)	1.9865	0.0044551
LRP4	LDL receptor related protein 4	1.9827	0.0076583
PPP1R3G	protein phosphatase 1 regulatory subunit 3G	1.9812	0.030499
CSF1R	colony stimulating factor 1 receptor	1.9762	0.00046975
TMEM38B	transmembrane protein 38B	1.9674	0.001264
C11orf45	chromosome 11 open reading frame 45	1.9666	0.026462
PPP2R2C	protein phosphatase 2 regulatory subunit Bgamma	1.9623	0.0072316
FILIP1	filamin A interacting protein 1	1.9542	0.020734
SPTLC3	serine palmitoyltransferase long chain base subunit 3	1.9518	0.0033825
FAM89A	family with sequence similarity 89 member A	1.9418	0.0013637
ARHGEF4	Rho guanine nucleotide exchange factor 4	1.9383	0.0079873
HPCAL1	hippocalcin like 1	1.9277	0.0002046
HMGA1	high mobility group AT-hook 1	1.9277	0.0054525
ACVR2A	activin A receptor type 2A	1.9259	0.0024256
DPY19L2	dpy-19 like 2	1.9252	0.0011092
DNAH14	dynein axonemal heavy chain 14	1.9231	0.00013188
LPAR1	lysophosphatidic acid receptor 1	1.9151	0.0039816
TNFAIP3	TNF alpha induced protein 3	1.9124	0.013249
GLYATL1	glycine-N-acyltransferase like 1	1.9043	0.011593
PTGS2	prostaglandin-endoperoxide synthase 2	1.9039	0.043994
CIITA	class II major histocompatibility complex transactivator	1.9033	0.028366
HPGD	15-hydroxyprostaglandin dehydrogenase	1.9019	0.01272
AQP11	aquaporin 11	1.8976	0.0020052
NAV3	neuron navigator 3	1.8943	0.015021
ZMAT1	zinc finger matrin-type 1	1.8931	0.0040685
PCDH9	protocadherin 9	1.8859	0.0045578
NGEF	neuronal guanine nucleotide exchange factor	1.8852	0.00052509
SDC1	syndecan 1	1.8827	0.0035268
GPR39	G protein-coupled receptor 39	1.8741	0.0016975
COL13A1	collagen type XIII alpha 1 chain	1.8627	0.020272
TMEM71	transmembrane protein 71	1.8607	0.0026496
SSBP2	single stranded DNA binding protein 2	1.85	0.013261
ECM1	extracellular matrix protein 1	1.8493	0.0018152
SMPD1	sphingomyelin phosphodiesterase 1	1.8426	0.0085317
TSHZ3	teashirt zinc finger homeobox 3	1.8421	0.0039771
ARL4A	ADP ribosylation factor like GTPase 4A	1.8332	0.001165
SPOCD1	SPOC domain containing 1	1.8317	0.021909
UBQLNL	ubiquilin like	1.8304	0.001165
NPAS2	neuronal PAS domain protein 2	1.8304	0.0016421
ITGA7	integrin subunit alpha 7	1.8253	0.0045578
IL15	interleukin 15	1.8239	0.023678
EPCAM	epithelial cell adhesion molecule	1.8173	0.0028168
ELOVL6	ELOVL fatty acid elongase 6	1.8162	0.0037414
GREB1L	GREB1 like retinoic acid receptor coactivator	1.8108	0.0057854
BATF2	basic leucine zipper ATF-like transcription factor 2	1.8057	0.00052133
SPEF2	sperm flagellar 2	1.8025	0.043494
RAVER2	"ribonucleoprotein, PTB binding 2"	1.7997	0.0083624
CYP39A1	cytochrome P450 family 39 subfamily A member 1	1.7858	0.0080504
PLEKHH2	"pleckstrin homology, MyTH4 and FERM domain containing H2"	1.7857	0.026373
CLCF1	cardiotrophin like cytokine factor 1	1.783	0.0017973
CRYL1	crystallin lambda 1	1.7824	0.0011998
EPHA4	EPH receptor A4	1.7817	0.00016817
BMPR1B	bone morphogenetic protein receptor type 1B	1.7801	0.010449
FA2H	fatty acid 2-hydroxylase	1.7764	0.0033723
CCDC85B	coiled-coil domain containing 85B	1.7762	0.0010973
RGL1	ral guanine nucleotide dissociation stimulator like 1	1.7745	0.040949
CRYM	crystallin mu	1.7729	0.016845
PTGER2	prostaglandin E receptor 2	1.7709	0.029054
COL11A1	collagen type XI alpha 1 chain	1.7605	0.019792
FRK	fyn related Src family tyrosine kinase	1.7556	0.049326
RHCE	Rh blood group CcEe antigens	1.7555	0.0025774
LRRC8B	leucine rich repeat containing 8 VRAC subunit B	1.7408	0.00017147
PRLR	prolactin receptor	1.739	0.00073255
SIPA1	signal-induced proliferation-associated 1	1.7375	0.0020825
FABP5	fatty acid binding protein 5	1.7367	0.017557
CLIP2	CAP-Gly domain containing linker protein 2	1.7342	0.0016421
CCDC184	coiled-coil domain containing 184	1.73	0.030688
ABCB4	ATP binding cassette subfamily B member 4	1.7297	0.027125
RORA	RAR related orphan receptor A	1.7295	0.0088005
ETV5	ETS variant transcription factor 5	1.7285	0.014031
RIN1	Ras and Rab interactor 1	1.7242	0.0033408
AVPI1	arginine vasopressin induced 1	1.7224	0.00093095
SERP2	stress associated endoplasmic reticulum protein family member 2	1.7209	0.00042979
KCNG1	potassium voltage-gated channel modifier subfamily G member 1	1.7187	0.0028023
TNFSF13B	TNF superfamily member 13b	1.7175	0.038385
PRKG1	protein kinase cGMP-dependent 1	1.7167	0.015917
ALDOC	"aldolase, fructose-bisphosphate C"	1.7098	0.0061405
PYROXD2	pyridine nucleotide-disulphide oxidoreductase domain 2	1.7043	0.0025731
NRG1	neuregulin 1	1.7034	0.0064789
RARRES1	retinoic acid receptor responder 1	1.6995	0.02466
IGDCC4	immunoglobulin superfamily DCC subclass member 4	1.6855	0.012242
ANXA10	annexin A10	1.6807	0.00043121
TSPAN13	tetraspanin 13	1.6685	0.0064124
LINC01252	long intergenic non-protein coding RNA 1252	1.6656	0.0044511
SLC2A3	solute carrier family 2 member 3	1.6656	0.0061825
FAM227B	family with sequence similarity 227 member B	1.6634	0.0024863
CDH15	cadherin 15	1.6579	0.044534
PREX1	"phosphatidylinositol-3,4,5-trisphosphate dependent Rac exchange factor 1"	1.6555	0.0092457
ELMOD1	ELMO domain containing 1	1.6494	0.0012117
PKP3	plakophilin 3	1.6465	0.005741
IRGM	immunity related GTPase M	1.6413	0.029187
MMP1	matrix metallopeptidase 1	1.6357	0.0035661
ARL14EPL	ADP ribosylation factor like GTPase 14 effector protein like	1.6355	0.023779
ELOVL3	ELOVL fatty acid elongase 3	1.6271	0.0032423
EXPH5	exophilin 5	1.6261	0.00097027
SLC43A3	solute carrier family 43 member 3	1.624	0.012689
HIVEP3	HIVEP zinc finger 3	1.6232	0.002303
ITPKA	inositol-trisphosphate 3-kinase A	1.6132	0.020044
ZMIZ1-AS1	ZMIZ1 antisense RNA 1	1.6114	0.020595
LOC400684	uncharacterized LOC400684	1.6061	0.0036521
FCRLB	Fc receptor like B	1.6042	0.00038825
STRIP2	striatin interacting protein 2	1.6028	0.012302
GCNT1	glucosaminyl (N-acetyl) transferase 1	1.6	0.0014609
TMEM138	transmembrane protein 138	1.5959	0.00063031
BVES	blood vessel epicardial substance	1.5922	0.016282
RNLS	"renalase, FAD dependent amine oxidase"	1.591	0.0069357
GATA6-AS1	GATA6 antisense RNA 1 (head to head)	1.5881	0.0037267
MAGED4B	MAGE family member D4B	1.5864	0.0067186
SPATA17	spermatogenesis associated 17	1.5812	0.0010462
VPS37D	VPS37D subunit of ESCRT-I	1.5724	0.0032004
IKBKE	inhibitor of nuclear factor kappa B kinase subunit epsilon	1.5724	0.016427
SLC4A8	solute carrier family 4 member 8	1.5709	0.0038246
FTHL17	ferritin heavy chain like 17	1.5656	0.014973
CABYR	calcium binding tyrosine phosphorylation regulated	1.5641	0.0070879
IFITM10	interferon induced transmembrane protein 10	1.5637	0.0019707
HTRA1	HtrA serine peptidase 1	1.5623	0.0037326
DBP	D-box binding PAR bZIP transcription factor	1.558	0.017032
SLC1A3	solute carrier family 1 member 3	1.5568	0.0022116
TRABD2A	TraB domain containing 2A	1.5552	0.020529
WDR17	WD repeat domain 17	1.555	0.018499
TMEM198	transmembrane protein 198	1.5539	0.023064
CIART	circadian associated repressor of transcription	1.5538	0.0028662
ZNF385B	zinc finger protein 385B	1.551	0.014003
PTGIR	prostaglandin I2 receptor	1.5509	0.0040662
MAPT	microtubule associated protein tau	1.5501	0.00057633
CHN1	chimerin 1	1.5479	0.031049
SMPDL3A	sphingomyelin phosphodiesterase acid like 3A	1.5455	0.022295
CD83	CD83 molecule	1.5439	0.0037326
TNFRSF21	TNF receptor superfamily member 21	1.5423	0.014536
MFHAS1	malignant fibrous histiocytoma amplified sequence 1	1.5414	0.001761
NKX6-3	NK6 homeobox 3	1.5391	0.0043074
FPR1	formyl peptide receptor 1	1.534	0.0076652
LINC00706	long intergenic non-protein coding RNA 706	1.5319	0.02149
C4orf36	chromosome 4 open reading frame 36	1.5306	0.0028124
ANKEF1	ankyrin repeat and EF-hand domain containing 1	1.5265	0.0033089
IL17D	interleukin 17D	1.5264	0.0095846
IRAK4	interleukin 1 receptor associated kinase 4	1.5234	0.00093095
LINC01510	long intergenic non-protein coding RNA 1510	1.521	0.0014597
PIK3CD	"phosphatidylinositol-4,5-bisphosphate 3-kinase catalytic subunit delta"	1.5201	0.006335
HNMT	histamine N-methyltransferase	1.5119	0.020272
ATP2B1	ATPase plasma membrane Ca2+ transporting 1	1.5117	0.027503
TSPAN10	tetraspanin 10	1.5105	0.0067186
LMO4	LIM domain only 4	1.5101	0.0020629
DPY19L2P2	DPY19L2 pseudogene 2	1.5061	0.011805
SLC22A3	solute carrier family 22 member 3	1.5051	0.013899
BSCL2	"BSCL2 lipid droplet biogenesis associated, seipin"	1.5049	0.0046552
C2orf81	chromosome 2 open reading frame 81	1.503	0.026202
HOPX	HOP homeobox	1.5005	0.011932
RIMBP3	RIMS binding protein 3	1.5001	0.035877
NR5A2	nuclear receptor subfamily 5 group A member 2	1.5	0.012391
PITPNM1	phosphatidylinositol transfer protein membrane associated 1	1.494	0.046579
IRS2	insulin receptor substrate 2	1.4936	0.0027691
SEC16B	"SEC16 homolog B, endoplasmic reticulum export factor"	1.4921	0.00269
POLA2	"DNA polymerase alpha 2, accessory subunit"	1.4921	0.0032913
GYPC	glycophorin C (Gerbich blood group)	1.4881	0.033222
STEAP2	STEAP2 metalloreductase	1.4849	0.0061672
SFXN2	sideroflexin 2	1.4817	0.0059899
PPP1R32	protein phosphatase 1 regulatory subunit 32	1.4802	0.00088531
NINJ2	ninjurin 2	1.4796	0.0025062
NT5E	5'-nucleotidase ecto	1.4772	0.0019288
TNFRSF1B	TNF receptor superfamily member 1B	1.4769	0.011188
ZBTB26	zinc finger and BTB domain containing 26	1.4764	0.0024572
CTH	cystathionine gamma-lyase	1.4761	0.0037705
LIFR	LIF receptor subunit alpha	1.4756	0.038192
ATE1-AS1	ATE1 antisense RNA 1	1.4679	0.031965
RNF125	ring finger protein 125	1.4662	0.010388
LINC01119	long intergenic non-protein coding RNA 1119	1.4644	0.0031997
LYG1	lysozyme g1	1.4636	0.00081641
HSPB3	heat shock protein family B (small) member 3	1.4599	0.03263
ADAMTS1	ADAM metallopeptidase with thrombospondin type 1 motif 1	1.4597	0.011792
HLA-DMA	"major histocompatibility complex, class II, DM alpha"	1.4505	0.0017673
SLC8A1	solute carrier family 8 member A1	1.4492	0.0054262
EHHADH	enoyl-CoA hydratase and 3-hydroxyacyl CoA dehydrogenase	1.447	0.0034491
KCTD4	potassium channel tetramerization domain containing 4	1.4459	0.048971
MSMO1	methylsterol monooxygenase 1	1.4432	0.0061592
DRAP1	DR1 associated protein 1	1.4429	0.00060068
EHD3	EH domain containing 3	1.4415	0.047411
CUL7	cullin 7	1.441	0.037854
NBPF14	NBPF member 14	1.4398	0.010241
GPR85	G protein-coupled receptor 85	1.4385	0.019596
PCOLCE	procollagen C-endopeptidase enhancer	1.4384	0.0025062
TMEM159	transmembrane protein 159	1.4343	0.0022044
ZDHHC14	zinc finger DHHC-type palmitoyltransferase 14	1.4309	0.0020021
GCNT3	"glucosaminyl (N-acetyl) transferase 3, mucin type"	1.4309	0.025368
ZNF503	zinc finger protein 503	1.4273	0.0025774
UNC93B1	"unc-93 homolog B1, TLR signaling regulator"	1.4267	0.031764
PATL1	"PAT1 homolog 1, processing body mRNA decay factor"	1.4223	0.022659
ARHGAP24	Rho GTPase activating protein 24	1.4207	0.0017839
LAMC2	laminin subunit gamma 2	1.4196	0.0050386
NLGN1	neuroligin 1	1.4132	0.0016794
DMKN	dermokine	1.4131	0.0048344
RCAN3	RCAN family member 3	1.4116	0.041237
RERGL	RERG like	1.4097	0.030364
FBXL7	F-box and leucine rich repeat protein 7	1.4096	0.015195
PLA2R1	phospholipase A2 receptor 1	1.4094	0.03263
ST8SIA4	"ST8 alpha-N-acetyl-neuraminide alpha-2,8-sialyltransferase 4"	1.4079	0.0054326
HSPB8	heat shock protein family B (small) member 8	1.4076	0.038755
PXYLP1	2-phosphoxylose phosphatase 1	1.3997	0.0034763
EML3	EMAP like 3	1.3978	0.0089012
NOS1AP	nitric oxide synthase 1 adaptor protein	1.3956	0.0045578
DMXL2	Dmx like 2	1.3952	0.0045058
UBL3	ubiquitin like 3	1.3926	0.02561
SEC22B	"SEC22 homolog B, vesicle trafficking protein (gene/pseudogene)"	1.3871	0.0083619
RPS6KA4	ribosomal protein S6 kinase A4	1.382	0.022953
S100A3	S100 calcium binding protein A3	1.3814	0.020286
ARHGAP32	Rho GTPase activating protein 32	1.3803	0.0013711
ACTA2	"actin alpha 2, smooth muscle"	1.3758	0.040433
LINC00545	long intergenic non-protein coding RNA 545	1.3731	0.010724
NUP62CL	nucleoporin 62 C-terminal like	1.3715	0.034538
BVES-AS1	BVES antisense RNA 1	1.367	0.0080125
CNKSR1	connector enhancer of kinase suppressor of Ras 1	1.3651	0.0088886
SH2D5	SH2 domain containing 5	1.3631	0.0019707
TNIK	TRAF2 and NCK interacting kinase	1.3624	0.0012356
LINC01204	long intergenic non-protein coding RNA 1204	1.3605	0.0022626
SDC4	syndecan 4	1.3603	0.045357
MAP4K2	mitogen-activated protein kinase kinase kinase kinase 2	1.3602	0.032901
MSANTD3	Myb/SANT DNA binding domain containing 3	1.3587	0.00215
GPR153	G protein-coupled receptor 153	1.3587	0.039913
PTPRZ1	protein tyrosine phosphatase receptor type Z1	1.3582	0.0036979
CPNE7	copine 7	1.3556	0.0037537
MANBA	mannosidase beta	1.3526	0.013356
NFKB2	nuclear factor kappa B subunit 2	1.3504	0.039959
SLC16A7	solute carrier family 16 member 7	1.3486	0.0052223
SFR1	SWI5 dependent homologous recombination repair protein 1	1.3463	0.0034314
SPAG16	sperm associated antigen 16	1.3437	0.0058385
NOX5	NADPH oxidase 5	1.3404	0.0066777
DDX60L	DExD/H-box 60 like	1.3358	0.00093095
DCTD	dCMP deaminase	1.3352	0.0015505
SOX5	SRY-box transcription factor 5	1.3347	0.041564
TMOD2	tropomodulin 2	1.3329	0.0036521
SMIM1	small integral membrane protein 1 (Vel blood group)	1.3306	0.0050144
CD44	CD44 molecule (Indian blood group)	1.3275	0.026202
S1PR2	sphingosine-1-phosphate receptor 2	1.3252	0.0083187
CDK14	cyclin dependent kinase 14	1.3219	0.0018841
RENBP	renin binding protein	1.3216	0.010728
LOX	lysyl oxidase	1.3206	0.0028791
TBC1D17	TBC1 domain family member 17	1.3205	0.020175
DAGLB	diacylglycerol lipase beta	1.3198	0.0057784
FAM225A	family with sequence similarity 225 member A	1.3176	0.0080683
CD82	CD82 molecule	1.3104	0.039269
CCDC74B	coiled-coil domain containing 74B	1.3079	0.020572
STARD5	StAR related lipid transfer domain containing 5	1.3066	0.0075701
RAD9A	RAD9 checkpoint clamp component A	1.3065	0.0087631
AFF3	AF4/FMR2 family member 3	1.306	0.016603
LACC1	laccase domain containing 1	1.305	0.012481
OAS1	2'-5'-oligoadenylate synthetase 1	1.3003	0.0033963
PWWP2B	PWWP domain containing 2B	1.2987	0.0023129
C6orf141	chromosome 6 open reading frame 141	1.2985	0.037955
TMC7	transmembrane channel like 7	1.29	0.04816
STYK1	serine/threonine/tyrosine kinase 1	1.289	0.0028774
FAM102B	family with sequence similarity 102 member B	1.2855	0.0011592
NCEH1	neutral cholesterol ester hydrolase 1	1.285	0.0020441
CEP19	centrosomal protein 19	1.2811	0.0040685
FAH	fumarylacetoacetate hydrolase	1.2776	0.0067186
FLJ43315	asparagine synthetase pseudogene	1.2753	0.014031
MT1HL1	metallothionein 1H like 1	1.2728	0.022857
ANKS6	ankyrin repeat and sterile alpha motif domain containing 6	1.2704	0.015998
STARD10	StAR related lipid transfer domain containing 10	1.27	0.0047935
FOXP2	forkhead box P2	1.2687	0.0019288
CCDC87	coiled-coil domain containing 87	1.2686	0.019164
COPG2IT1	COPG2 imprinted transcript 1	1.2627	0.042163
UBE2L6	ubiquitin conjugating enzyme E2 L6	1.2626	0.0022116
ESR2	estrogen receptor 2	1.2604	0.038045
ACER3	alkaline ceramidase 3	1.2598	0.0016089
MMP7	matrix metallopeptidase 7	1.2593	0.043636
MFSD10	major facilitator superfamily domain containing 10	1.25	0.023747
MAFB	MAF bZIP transcription factor B	1.248	0.025401
AHRR	aryl-hydrocarbon receptor repressor	1.2458	0.0012001
KCTD13	potassium channel tetramerization domain containing 13	1.2438	0.012766
PDZK1	PDZ domain containing 1	1.2419	0.0075206
ANGPT1	angiopoietin 1	1.2416	0.044351
SPAG17	sperm associated antigen 17	1.2407	0.0019288
MT1L	"metallothionein 1L, pseudogene"	1.2357	0.018053
ZFP91	ZFP91 zinc finger protein	1.2324	0.0031901
SLC2A14	solute carrier family 2 member 14	1.2324	0.0075518
ZMYND8	zinc finger MYND-type containing 8	1.232	0.025217
ZDHHC11	zinc finger DHHC-type containing 11	1.2314	0.026798
IFIT1	interferon induced protein with tetratricopeptide repeats 1	1.2289	0.026881
SPINK2	serine peptidase inhibitor Kazal type 2	1.2269	0.0065946
RBPJ	recombination signal binding protein for immunoglobulin kappa J region	1.2241	0.011334
DDIAS	DNA damage induced apoptosis suppressor	1.2225	0.0032176
SERPINE1	serpin family E member 1	1.2208	0.023779
EGFR	epidermal growth factor receptor	1.2169	0.0052467
KDELR3	KDEL endoplasmic reticulum protein retention receptor 3	1.2167	0.0065666
CDC14C	cell division cycle 14C	1.2154	0.0060694
TTC30A	tetratricopeptide repeat domain 30A	1.2088	0.019169
DMGDH	dimethylglycine dehydrogenase	1.2082	0.030119
TDRD6	tudor domain containing 6	1.2073	0.0040662
C11orf24	chromosome 11 open reading frame 24	1.2061	0.0012356
TRIM63	tripartite motif containing 63	1.2015	0.0018332
CDHR3	cadherin related family member 3	1.1975	0.020774
PPFIA1	PTPRF interacting protein alpha 1	1.1961	0.0024916
ASB10	ankyrin repeat and SOCS box containing 10	1.1936	0.045149
PDE4DIP	phosphodiesterase 4D interacting protein	1.1933	0.032245
CTBP1	C-terminal binding protein 1	1.1917	0.0029628
CCDC74A	coiled-coil domain containing 74A	1.1913	0.014535
INPP4A	inositol polyphosphate-4-phosphatase type I A	1.1911	0.014346
INTS5	integrator complex subunit 5	1.1871	0.0034491
DPEP1	dipeptidase 1	1.1858	0.047411
CATSPER1	cation channel sperm associated 1	1.1833	0.0058385
TMEM179B	transmembrane protein 179B	1.1831	0.0017029
RTKN	rhotekin	1.1819	0.019491
CARD9	caspase recruitment domain family member 9	1.1798	0.0068804
ARMCX2	armadillo repeat containing X-linked 2	1.1782	0.004971
B3GNTL1	"UDP-GlcNAc:betaGal beta-1,3-N-acetylglucosaminyltransferase like 1"	1.1734	0.010614
IL7	interleukin 7	1.1727	0.044923
IFIT1B	interferon induced protein with tetratricopeptide repeats 1B	1.1716	0.0067499
ZDHHC18	zinc finger DHHC-type palmitoyltransferase 18	1.1707	0.037404
LAMTOR1	"late endosomal/lysosomal adaptor, MAPK and MTOR activator 1"	1.1703	0.0030671
PHC2	polyhomeotic homolog 2	1.1703	0.0043197
WDFY2	WD repeat and FYVE domain containing 2	1.167	0.0067227
GLCCI1	glucocorticoid induced 1	1.1629	0.011419
TUBGCP2	tubulin gamma complex associated protein 2	1.1603	0.012198
TNFRSF11A	TNF receptor superfamily member 11a	1.1602	0.0092195
NUDT22	nudix hydrolase 22	1.1601	0.013158
CCDC136	coiled-coil domain containing 136	1.1582	0.0036306
GSTO2	glutathione S-transferase omega 2	1.1581	0.026798
IDH1	isocitrate dehydrogenase (NADP(+)) 1	1.1578	0.0016686
AVL9	AVL9 cell migration associated	1.1556	0.011701
TRPT1	tRNA phosphotransferase 1	1.1553	0.011405
VEPH1	ventricular zone expressed PH domain containing 1	1.1541	0.016694
MUS81	MUS81 structure-specific endonuclease subunit	1.1529	0.0046507
LAMA3	laminin subunit alpha 3	1.1491	0.026451
C1orf226	chromosome 1 open reading frame 226	1.148	0.031212
SH3RF3	SH3 domain containing ring finger 3	1.1466	0.0075438
FARSB	phenylalanyl-tRNA synthetase subunit beta	1.1449	0.0067227
FKBP10	FKBP prolyl isomerase 10	1.1438	0.019946
CYB561	cytochrome b561	1.1402	0.014031
AP5B1	adaptor related protein complex 5 subunit beta 1	1.1374	0.0030468
COA1	cytochrome c oxidase assembly factor 1 homolog	1.1373	0.0059011
ZP1	zona pellucida glycoprotein 1	1.137	0.017351
ARHGEF18	Rho/Rac guanine nucleotide exchange factor 18	1.1362	0.048519
MT1X	metallothionein 1X	1.135	0.035543
MNS1	meiosis specific nuclear structural 1	1.1347	0.014213
MSX1	msh homeobox 1	1.1347	0.031108
LINC01574	long intergenic non-protein coding RNA 1574	1.1331	0.010793
NTS	neurotensin	1.1295	0.0025774
IRX5	iroquois homeobox 5	1.1284	0.0042708
GBAP1	glucosylceramidase beta pseudogene 1	1.1241	0.033993
VSTM2L	V-set and transmembrane domain containing 2 like	1.1231	0.046908
SMTN	smoothelin	1.1222	0.0094446
SEC1P	"secretory blood group 1, pseudogene"	1.1215	0.04556
SH3RF2	SH3 domain containing ring finger 2	1.1193	0.028421
CRABP2	cellular retinoic acid binding protein 2	1.118	0.010758
UQCC3	ubiquinol-cytochrome c reductase complex assembly factor 3	1.1169	0.0036725
FAM86JP	"family with sequence similarity 86 member J, pseudogene"	1.1165	0.014683
LRRC41	leucine rich repeat containing 41	1.1164	0.013786
HSPA2	heat shock protein family A (Hsp70) member 2	1.1159	0.022318
MEIS3	Meis homeobox 3	1.1151	0.032385
ZNHIT2	zinc finger HIT-type containing 2	1.1142	0.010077
PAQR5	progestin and adipoQ receptor family member 5	1.1127	0.015675
RSF1	remodeling and spacing factor 1	1.1125	0.0020361
KREMEN1	kringle containing transmembrane protein 1	1.1106	0.02123
QDPR	quinoid dihydropteridine reductase	1.1105	0.0047935
KIAA0513	KIAA0513	1.1096	0.0020052
EIF5A2	eukaryotic translation initiation factor 5A2	1.1095	0.011501
NAAA	N-acylethanolamine acid amidase	1.1085	0.032413
MMD	monocyte to macrophage differentiation associated	1.1082	0.0081977
SIMC1	SUMO interacting motifs containing 1	1.1081	0.013356
PER3	period circadian regulator 3	1.1078	0.0050132
MT1E	metallothionein 1E	1.1071	0.023765
GLT8D2	glycosyltransferase 8 domain containing 2	1.106	0.047539
MGAT5B	"alpha-1,6-mannosylglycoprotein 6-beta-N-acetylglucosaminyltransferase B"	1.1049	0.0046302
ATL3	atlastin GTPase 3	1.1044	0.018108
DDIT3	DNA damage inducible transcript 3	1.1036	0.043578
CCS	copper chaperone for superoxide dismutase	1.1029	0.010083
LOC284950	uncharacterized LOC284950	1.1028	0.010332
ADAM22	ADAM metallopeptidase domain 22	1.1015	0.0099733
GSTO1	glutathione S-transferase omega 1	1.1003	0.0028791
PLXNB3	plexin B3	1.1002	0.019506
LYSMD2	LysM domain containing 2	1.0994	0.0092457
CLCN2	chloride voltage-gated channel 2	1.0979	0.017325
IGSF8	immunoglobulin superfamily member 8	1.0974	0.049179
RELA	"RELA proto-oncogene, NF-kB subunit"	1.0955	0.025944
THRA	thyroid hormone receptor alpha	1.0952	0.018402
MTCP1	mature T cell proliferation 1	1.0945	0.038797
RAET1E	retinoic acid early transcript 1E	1.0944	0.0052692
CHST2	carbohydrate sulfotransferase 2	1.093	0.016442
CR2	complement C3d receptor 2	1.092	0.022615
JMJD6	"jumonji domain containing 6, arginine demethylase and lysine hydroxylase"	1.0915	0.0067186
IGF2BP1	insulin like growth factor 2 mRNA binding protein 1	1.0912	0.0083306
LOC100653133	golgin subfamily A member 6-like protein 1	1.0907	0.018108
CTSL	cathepsin L	1.089	0.01115
ACVR1C	activin A receptor type 1C	1.0888	0.0022626
SAMD10	sterile alpha motif domain containing 10	1.0887	0.045135
SCAMP4	secretory carrier membrane protein 4	1.0877	0.033026
SPINK13	serine peptidase inhibitor Kazal type 13	1.0876	0.01766
PPP1CA	protein phosphatase 1 catalytic subunit alpha	1.0876	0.023182
ASL	argininosuccinate lyase	1.0861	0.045877
SOBP	sine oculis binding protein homolog	1.0855	0.022455
ASAP3	"ArfGAP with SH3 domain, ankyrin repeat and PH domain 3"	1.0837	0.0020361
STAT2	signal transducer and activator of transcription 2	1.0836	0.010037
RAB3A	"RAB3A, member RAS oncogene family"	1.0827	0.0096262
MAPK10	mitogen-activated protein kinase 10	1.0812	0.0047002
SENP2	SUMO specific peptidase 2	1.0776	0.006798
ERCC1	"ERCC excision repair 1, endonuclease non-catalytic subunit"	1.073	0.0062129
CCDC115	coiled-coil domain containing 115	1.0725	0.0034116
NAALADL1	N-acetylated alpha-linked acidic dipeptidase like 1	1.0723	0.018842
COPZ1	COPI coat complex subunit zeta 1	1.0723	0.019364
NUP210L	nucleoporin 210 like	1.0719	0.014213
MND1	meiotic nuclear divisions 1	1.0716	0.021473
GCNT2	glucosaminyl (N-acetyl) transferase 2 (I blood group)	1.0707	0.013514
STX3	syntaxin 3	1.066	0.003057
SPATS2L	spermatogenesis associated serine rich 2 like	1.0656	0.0040039
MIPEPP3	mitochondrial intermediate peptidase pseudogene 3	1.0652	0.03125
FEN1	flap structure-specific endonuclease 1	1.0648	0.0045232
C16orf89	chromosome 16 open reading frame 89	1.064	0.037627
RNASEL	ribonuclease L	1.0638	0.015334
CYP2E1	cytochrome P450 family 2 subfamily E member 1	1.0627	0.024426
B3GNT9	"UDP-GlcNAc:betaGal beta-1,3-N-acetylglucosaminyltransferase 9"	1.0619	0.024174
GGTLC2	gamma-glutamyltransferase light chain 2	1.0617	0.028879
ZNF330	zinc finger protein 330	1.0608	0.0033544
CCDC96	coiled-coil domain containing 96	1.0594	0.042792
STX18	syntaxin 18	1.0566	0.005332
RASAL2	RAS protein activator like 2	1.0563	0.0062523
ZFYVE9	zinc finger FYVE-type containing 9	1.0546	0.016048
ANKMY2	ankyrin repeat and MYND domain containing 2	1.053	0.010279
RAB36	"RAB36, member RAS oncogene family"	1.0529	0.037954
ITGB5	integrin subunit beta 5	1.0525	0.0077699
ZDHHC5	zinc finger DHHC-type palmitoyltransferase 5	1.0494	0.0078672
DGKQ	diacylglycerol kinase theta	1.0467	0.0046259
SLC28A3	solute carrier family 28 member 3	1.0452	0.0075206
ABAT	4-aminobutyrate aminotransferase	1.0446	0.0085126
MSH5	mutS homolog 5	1.0409	0.0058954
NDNF	neuron derived neurotrophic factor	1.0403	0.038186
CHID1	chitinase domain containing 1	1.04	0.042156
LRPAP1	LDL receptor related protein associated protein 1	1.0389	0.02142
CYTIP	cytohesin 1 interacting protein	1.0382	0.013236
EHBP1	EH domain binding protein 1	1.0365	0.033743
BIN1	bridging integrator 1	1.035	0.034304
MT1A	metallothionein 1A	1.0328	0.014586
LARP6	"La ribonucleoprotein 6, translational regulator"	1.0315	0.014206
STPG1	sperm tail PG-rich repeat containing 1	1.0278	0.0061776
HMCN1	hemicentin 1	1.0257	0.028269
NANOG	Nanog homeobox	1.0253	0.0034443
TRIP10	thyroid hormone receptor interactor 10	1.0241	0.040433
EIF2B5	eukaryotic translation initiation factor 2B subunit epsilon	1.0229	0.0053789
SLC22A18	solute carrier family 22 member 18	1.0217	0.0075206
ABCC6	ATP binding cassette subfamily C member 6	1.0213	0.019789
STRADB	STE20 related adaptor beta	1.021	0.041262
MAN2B1	mannosidase alpha class 2B member 1	1.0176	0.020774
BAIAP3	BAI1 associated protein 3	1.0172	0.023005
ELF3	E74 like ETS transcription factor 3	1.017	0.046841
THAP7	THAP domain containing 7	1.0162	0.019776
RAB3B	"RAB3B, member RAS oncogene family"	1.0143	0.030549
RASSF4	Ras association domain family member 4	1.0141	0.022824
TMEM185B	transmembrane protein 185B	1.0129	0.003082
TMEM17	transmembrane protein 17	1.0129	0.013249
MSANTD3-TMEFF1	MSANTD3-TMEFF1 readthrough	1.0106	0.024814
FAM156B	family with sequence similarity 156 member B	1.0104	0.021109
CDKL5	cyclin dependent kinase like 5	1.0104	0.026887
H6PD	hexose-6-phosphate dehydrogenase/glucose 1-dehydrogenase	1.0094	0.02184
PRIMPOL	primase and DNA directed polymerase	1.0072	0.030595
ESRRA	estrogen related receptor alpha	1.0058	0.01706
SLC1A5	solute carrier family 1 member 5	1.0015	0.013213
RDH12	retinol dehydrogenase 12	1.0007	0.0065946
SAMD9L	sterile alpha motif domain containing 9 like	1.0004	0.0035268
