# Supplementary material for: RNF213 Loss-of-Function Promotes Angiogenesis of Cerebral Microvascular Endothelial Cells in a Cellular State Dependent Manner
Source: Cells. 2022 Dec 24;12(1):78. doi: 10.3390/cells12010078 (PMC9818782; doi:10.3390/cells12010078)
Supplement: Supplementary file 1 [file cells-12-00078-s001.zip › Table S2.xlsx]

## Sheet: Feuil1
Table S2: Most significantly down-regulated genes in proliferative RNF213-deficient hCMEC/D3
Symbols	Name	Log (Fold Change)	Ajusted p-value
MPZL2	myelin protein zero like 2	-8.1502	7.4858e-07
NSG1	neuronal vesicle trafficking associated 1	-7.9225	8.4495e-05
CYP4X1	cytochrome P450 family 4 subfamily X member 1	-7.8237	3.7385e-07
MGP	matrix Gla protein	-6.877	0.00060068
ACVRL1	activin A receptor like type 1	-6.853	0.00013026
FGD5	"FYVE, RhoGEF and PH domain containing 5"	-6.6415	7.9379e-05
SULF1	sulfatase 1	-6.3783	0.00029437
PALM	paralemmin	-6.3375	2.1962e-06
IGFBP2	insulin like growth factor binding protein 2	-6.0089	8.4495e-05
EMCN	endomucin	-5.9246	0.0009529
FAM43A	family with sequence similarity 43 member A	-5.7348	8.5251e-05
PNMA2	PNMA family member 2	-5.72	0.0010462
EDIL3	EGF like repeats and discoidin domains 3	-5.6704	0.022318
FZD4	frizzled class receptor 4	-5.6494	7.979e-05
TAL1	"TAL bHLH transcription factor 1, erythroid differentiation factor"	-5.5808	5.6463e-06
SHE	Src homology 2 domain containing E	-5.4927	0.00029437
STAB1	stabilin 1	-5.4469	1.6581e-05
TAGLN	transgelin	-5.3195	0.015923
EDN1	endothelin 1	-5.3075	0.021454
GRASP	general receptor for phosphoinositides 1 associated scaffold protein	-5.1921	1.9818e-05
C2CD4B	C2 calcium dependent domain containing 4B	-5.1334	0.0003122
TLE2	"TLE family member 2, transcriptional corepressor"	-5.0613	0.00028373
MDFI	MyoD family inhibitor	-5.0281	1.6581e-05
CST6	cystatin E/M	-5.0026	0.0004841
GATA2-AS1	GATA2 antisense RNA 1	-4.9468	0.00060068
LINC00839	long intergenic non-protein coding RNA 839	-4.8915	0.000308
FAT1	FAT atypical cadherin 1	-4.8609	1.1596e-05
SLIT2	slit guidance ligand 2	-4.8443	6.8987e-05
LINC01018	long intergenic non-protein coding RNA 1018	-4.7418	0.00014976
PTGIS	prostaglandin I2 synthase	-4.6205	0.00052306
CACNG6	calcium voltage-gated channel auxiliary subunit gamma 6	-4.5045	6.14e-05
TIMP3	TIMP metallopeptidase inhibitor 3	-4.5005	0.0011718
EDN2	endothelin 2	-4.4936	0.0014558
GPR4	G protein-coupled receptor 4	-4.4792	0.0053168
FMO3	flavin containing dimethylaniline monoxygenase 3	-4.4704	8.4495e-05
MSMP	"microseminoprotein, prostate associated"	-4.4581	2.9587e-05
RASIP1	Ras interacting protein 1	-4.4581	0.00073255
GATA2	GATA binding protein 2	-4.4481	0.00041847
SHANK3	SH3 and multiple ankyrin repeat domains 3	-4.4412	0.0012356
TOX	thymocyte selection associated high mobility group box	-4.4237	0.00054801
PECAM1	platelet and endothelial cell adhesion molecule 1	-4.4129	0.0020361
MLIP	muscular LMNA interacting protein	-4.4047	7.979e-05
SHISA3	shisa family member 3	-4.401	0.046442
CGA	"glycoprotein hormones, alpha polypeptide"	-4.3965	5.1823e-05
RASGRP1	RAS guanyl releasing protein 1	-4.3782	0.00092441
TMEM45A	transmembrane protein 45A	-4.3631	0.041283
ERG	ETS transcription factor ERG	-4.3385	2.6555e-05
JAM3	junctional adhesion molecule 3	-4.3249	2.5697e-05
CCL2	C-C motif chemokine ligand 2	-4.3046	0.0039771
FGG	fibrinogen gamma chain	-4.2732	1.8651e-05
COL4A2	collagen type IV alpha 2 chain	-4.2674	0.024559
MGST1	microsomal glutathione S-transferase 1	-4.2323	0.044271
CA2	carbonic anhydrase 2	-4.2251	0.023779
NPDC1	"neural proliferation, differentiation and control 1"	-4.0241	0.0016634
SCML1	Scm polycomb group protein like 1	-4.0092	1.9045e-05
ABCA3	ATP binding cassette subfamily A member 3	-4.0065	6.6418e-05
CETP	cholesteryl ester transfer protein	-3.9581	0.00030178
NPR3	natriuretic peptide receptor 3	-3.9254	8.4495e-05
PCSK9	proprotein convertase subtilisin/kexin type 9	-3.9095	0.010275
RUNDC3B	RUN domain containing 3B	-3.8695	9.7473e-05
KRT14	keratin 14	-3.8651	4.8274e-05
MGMT	O-6-methylguanine-DNA methyltransferase	-3.8616	0.0069872
KCTD8	potassium channel tetramerization domain containing 8	-3.8535	0.0043251
LOC101060179	uncharacterized LOC101060179	-3.8295	0.00012249
FRMPD4	FERM and PDZ domain containing 4	-3.8286	0.00030533
MYCT1	MYC target 1	-3.8105	0.0065784
FRY	FRY microtubule binding protein	-3.7854	0.0029344
HES1	hes family bHLH transcription factor 1	-3.7676	0.00026395
CALD1	caldesmon 1	-3.7594	0.019596
ARRDC4	arrestin domain containing 4	-3.7547	0.047296
LITAF	lipopolysaccharide induced TNF factor	-3.7436	1.1823e-05
EGFL7	EGF like domain multiple 7	-3.7291	0.0005006
RAB17	"RAB17, member RAS oncogene family"	-3.7227	0.00022302
CADM3	cell adhesion molecule 3	-3.7178	0.0020553
MGARP	mitochondria localized glutamic acid rich protein	-3.6887	0.0042411
WASF3	WASP family member 3	-3.6836	0.00010982
NUPR1	"nuclear protein 1, transcriptional regulator"	-3.6825	0.0080417
IGFBP5	insulin like growth factor binding protein 5	-3.6669	0.039281
ATF7IP2	activating transcription factor 7 interacting protein 2	-3.6549	0.00027889
MYRIP	myosin VIIA and Rab interacting protein	-3.6478	0.016577
TRHDE-AS1	TRHDE antisense RNA 1	-3.6274	0.0085317
KRT17	keratin 17	-3.6223	2.5528e-05
ADRA1B	adrenoceptor alpha 1B	-3.6107	0.048851
PTGS1	prostaglandin-endoperoxide synthase 1	-3.6047	0.010259
LRRC32	leucine rich repeat containing 32	-3.6044	0.0046662
CRYAB	crystallin alpha B	-3.5829	0.010776
MSTN	myostatin	-3.5783	4.8274e-05
SLC46A1	solute carrier family 46 member 1	-3.5698	0.00017147
DCDC2	doublecortin domain containing 2	-3.5388	0.0061776
MPZL3	myelin protein zero like 3	-3.5334	9.7473e-05
SH2D3C	SH2 domain containing 3C	-3.5249	0.014721
SFN	stratifin	-3.4953	0.00019639
BTG2	BTG anti-proliferation factor 2	-3.4891	3.1515e-05
ANXA8L1	annexin A8 like 1	-3.4869	0.0066777
PARD6B	par-6 family cell polarity regulator beta	-3.4865	0.0069872
CYB5R2	cytochrome b5 reductase 2	-3.4676	9.7473e-05
MALL	"mal, T cell differentiation protein like"	-3.4422	9.2751e-05
ST3GAL6	"ST3 beta-galactoside alpha-2,3-sialyltransferase 6"	-3.437	0.0022116
ST6GALNAC1	"ST6 N-acetylgalactosaminide alpha-2,6-sialyltransferase 1"	-3.4364	0.00027889
TNFRSF10C	TNF receptor superfamily member 10c	-3.4273	9.5591e-05
RBP7	retinol binding protein 7	-3.4234	0.029044
MMRN1	multimerin 1	-3.4208	0.00029437
PRICKLE1	prickle planar cell polarity protein 1	-3.4034	0.021583
FAM78A	family with sequence similarity 78 member A	-3.3542	0.0002046
GNA14	G protein subunit alpha 14	-3.3001	0.0094603
C5orf46	chromosome 5 open reading frame 46	-3.2987	0.014754
ACTG2	"actin gamma 2, smooth muscle"	-3.2905	8.4495e-05
ARVCF	ARVCF delta catenin family member	-3.2703	0.00057379
MCAM	melanoma cell adhesion molecule	-3.2504	0.00018283
APCDD1L	APC down-regulated 1 like	-3.2421	0.046891
ST6GAL1	"ST6 beta-galactoside alpha-2,6-sialyltransferase 1"	-3.2267	8.8087e-05
LTBP2	latent transforming growth factor beta binding protein 2	-3.2	0.0012408
ZNF366	zinc finger protein 366	-3.1984	0.001146
CRIP2	cysteine rich protein 2	-3.1962	0.002307
CD200	CD200 molecule	-3.1959	0.00022913
AR	androgen receptor	-3.1766	0.00080996
ALPK3	alpha kinase 3	-3.172	0.0036144
ATP6V0A4	ATPase H+ transporting V0 subunit a4	-3.1693	2.5528e-05
SCARA3	scavenger receptor class A member 3	-3.1681	0.01183
NEDD9	"neural precursor cell expressed, developmentally down-regulated 9"	-3.1566	0.044493
APLN	apelin	-3.1466	0.0018841
ZNF682	zinc finger protein 682	-3.129	0.00018689
NES	nestin	-3.1247	0.0002792
EPB41L4A	erythrocyte membrane protein band 4.1 like 4A	-3.1244	0.033222
RNF150	ring finger protein 150	-3.1236	0.0022116
P3H2	prolyl 3-hydroxylase 2	-3.1167	9.7473e-05
CLEC3B	C-type lectin domain family 3 member B	-3.1133	0.023099
RBP1	retinol binding protein 1	-3.1075	0.01179
CNN1	calponin 1	-3.0676	0.0036406
ZFHX4-AS1	ZFHX4 antisense RNA 1	-3.064	0.00080532
GPR143	G protein-coupled receptor 143	-3.057	0.0012693
THEM6	thioesterase superfamily member 6	-3.0325	8.6784e-05
GIMAP2	"GTPase, IMAP family member 2"	-3.0324	0.0060643
NRARP	NOTCH regulated ankyrin repeat protein	-3.0232	0.00017147
EFEMP1	EGF containing fibulin extracellular matrix protein 1	-2.9988	0.0023006
ZNF681	zinc finger protein 681	-2.9956	0.027144
NRN1	neuritin 1	-2.9865	0.0097572
RASL10A	RAS like family 10 member A	-2.9807	0.00029645
RHOJ	ras homolog family member J	-2.979	0.00013026
LPAR6	lysophosphatidic acid receptor 6	-2.9768	0.0022116
CRLF1	cytokine receptor like factor 1	-2.9759	0.016347
SLCO2A1	solute carrier organic anion transporter family member 2A1	-2.9629	0.044841
PGF	placental growth factor	-2.9571	0.0002046
MYO5C	myosin VC	-2.9506	0.0039981
TSPAN2	tetraspanin 2	-2.9501	0.01548
APOD	apolipoprotein D	-2.9474	0.0014558
SLCO4A1	solute carrier organic anion transporter family member 4A1	-2.9364	0.00016817
PDGFB	platelet derived growth factor subunit B	-2.9314	0.016048
OSBPL10	oxysterol binding protein like 10	-2.9309	0.0055824
KCTD15	potassium channel tetramerization domain containing 15	-2.925	0.035274
CLUHP3	clustered mitochondria homolog pseudogene 3	-2.9038	5.1823e-05
RBPMS2	"RNA binding protein, mRNA processing factor 2"	-2.8976	0.0012569
C4B	complement C4B (Chido blood group)	-2.8866	0.014213
ASS1	argininosuccinate synthase 1	-2.8855	0.000104
FAM169A	family with sequence similarity 169 member A	-2.8465	0.010929
RAPGEF4	Rap guanine nucleotide exchange factor 4	-2.8361	0.00080822
BCL6B	BCL6B transcription repressor	-2.8265	0.0019222
PLAC9	placenta associated 9	-2.8212	8.4691e-05
KCNJ6	potassium inwardly rectifying channel subfamily J member 6	-2.8152	0.0082759
KRT18	keratin 18	-2.8134	0.014242
ALOX5	arachidonate 5-lipoxygenase	-2.7992	0.011701
RPL39L	ribosomal protein L39 like	-2.7884	0.00039307
NEIL1	nei like DNA glycosylase 1	-2.7817	0.00065065
VSTM1	V-set and transmembrane domain containing 1	-2.7812	0.0058315
C2CD4A	C2 calcium dependent domain containing 4A	-2.7803	0.00038825
CBS	cystathionine beta-synthase	-2.7616	0.00013907
TMEM204	transmembrane protein 204	-2.7587	0.0021589
ACKR4	atypical chemokine receptor 4	-2.7545	0.00042979
ZNF879	zinc finger protein 879	-2.7425	0.00052133
GPD1L	glycerol-3-phosphate dehydrogenase 1 like	-2.7311	0.0061776
KLHL6	kelch like family member 6	-2.7267	0.00042979
COL9A3	collagen type IX alpha 3 chain	-2.7237	0.0050204
SULF2	sulfatase 2	-2.714	0.015805
CD9	CD9 molecule	-2.7053	0.021454
SCG2	secretogranin II	-2.6991	0.0035238
PPM1H	"protein phosphatase, Mg2+/Mn2+ dependent 1H"	-2.6977	0.0034972
FOXS1	forkhead box S1	-2.6893	0.00090501
PLXND1	plexin D1	-2.684	0.014213
RAMP2	receptor activity modifying protein 2	-2.6663	0.00023618
PAPPA	pappalysin 1	-2.6555	0.013927
CRIP1	cysteine rich protein 1	-2.6551	0.011082
ZNF219	zinc finger protein 219	-2.6514	3.6028e-05
TMEM217	transmembrane protein 217	-2.651	0.0010502
RIPPLY3	ripply transcriptional repressor 3	-2.65	0.002743
EPPK1	epiplakin 1	-2.6286	0.00022302
FAM167B	family with sequence similarity 167 member B	-2.6201	8.4495e-05
UNC5B-AS1	UNC5B antisense RNA 1	-2.6099	0.015805
PLSCR4	phospholipid scramblase 4	-2.5971	0.00020611
CDH10	cadherin 10	-2.5957	0.0086462
PAWR	pro-apoptotic WT1 regulator	-2.5802	0.0014056
COL8A1	collagen type VIII alpha 1 chain	-2.5793	0.027936
TEK	TEK receptor tyrosine kinase	-2.5706	0.038827
GAS1	growth arrest specific 1	-2.5649	0.019977
CCL5	C-C motif chemokine ligand 5	-2.5608	0.0040685
DNASE1L3	deoxyribonuclease 1 like 3	-2.55	0.00042979
KIAA1217	KIAA1217	-2.5363	0.015272
CKB	creatine kinase B	-2.5338	0.022735
LOC100506411	uncharacterized LOC100506411	-2.5318	0.0004841
UNC5B	unc-5 netrin receptor B	-2.5284	0.0029715
TIE1	tyrosine kinase with immunoglobulin like and EGF like domains 1	-2.5253	0.0032088
ANGPT2	angiopoietin 2	-2.5175	0.011805
ITGB3	integrin subunit beta 3	-2.5043	0.0050672
CD248	CD248 molecule	-2.499	0.012498
DENND2A	DENN domain containing 2A	-2.4942	0.006335
HTR1D	5-hydroxytryptamine receptor 1D	-2.4879	0.00041326
COL8A2	collagen type VIII alpha 2 chain	-2.487	0.014544
EFNA1	ephrin A1	-2.4847	8.6644e-05
MANSC1	MANSC domain containing 1	-2.4845	0.0019661
PIK3C2B	phosphatidylinositol-4-phosphate 3-kinase catalytic subunit type 2 beta	-2.4822	0.0010462
CXADR	CXADR Ig-like cell adhesion molecule	-2.4808	0.0027787
PCDH1	protocadherin 1	-2.48	0.0062129
S1PR4	sphingosine-1-phosphate receptor 4	-2.47	0.011306
CCDC88C	coiled-coil domain containing 88C	-2.4627	0.00017362
ATP8B1	ATPase phospholipid transporting 8B1	-2.4574	0.0011117
LRRC24	leucine rich repeat containing 24	-2.4478	0.037625
SRSF8	serine and arginine rich splicing factor 8	-2.4461	0.00038825
LOC100129098	translation initiation factor IF-2	-2.4446	0.0015769
SORBS1	sorbin and SH3 domain containing 1	-2.4396	0.0025062
LINC01013	long intergenic non-protein coding RNA 1013	-2.4271	0.029581
DAAM2	dishevelled associated activator of morphogenesis 2	-2.4073	0.0058315
SOX18	SRY-box transcription factor 18	-2.4057	0.00031903
SULT1B1	sulfotransferase family 1B member 1	-2.4042	0.040437
CISH	cytokine inducible SH2 containing protein	-2.3926	0.00015239
BHLHE40	basic helix-loop-helix family member e40	-2.3918	0.0014597
HTRA4	HtrA serine peptidase 4	-2.3877	8.6784e-05
C5	complement C5	-2.3758	0.0024693
PTGFRN	prostaglandin F2 receptor inhibitor	-2.3692	0.0019525
ABI3BP	ABI family member 3 binding protein	-2.3563	0.00012249
CD34	CD34 molecule	-2.3553	0.0069051
TM6SF1	transmembrane 6 superfamily member 1	-2.3537	0.029054
CXCL12	C-X-C motif chemokine ligand 12	-2.3385	0.0075467
FIBIN	fin bud initiation factor homolog	-2.3384	0.0013711
SULT1A2	sulfotransferase family 1A member 2	-2.3348	8.2104e-05
TCF7L1	transcription factor 7 like 1	-2.3334	0.023047
ABLIM2	actin binding LIM protein family member 2	-2.3071	0.010269
C1orf198	chromosome 1 open reading frame 198	-2.3028	0.0043251
MYLK2	myosin light chain kinase 2	-2.2985	0.010949
RAMP2-AS1	RAMP2 antisense RNA 1	-2.2951	0.00055887
PDGFD	platelet derived growth factor D	-2.2937	0.045227
ZNF300P1	zinc finger protein 300 pseudogene 1	-2.2902	8.4691e-05
CALCRL	calcitonin receptor like receptor	-2.289	0.0028657
DHH	desert hedgehog signaling molecule	-2.2712	0.0007017
PDGFRL	platelet derived growth factor receptor like	-2.2634	0.0029423
ATP6V1G3	ATPase H+ transporting V1 subunit G3	-2.2612	0.00075042
CD274	CD274 molecule	-2.2556	0.00019416
SLPI	secretory leukocyte peptidase inhibitor	-2.2544	0.00068576
ZSCAN18	zinc finger and SCAN domain containing 18	-2.2423	0.00019448
VWF	von Willebrand factor	-2.2393	0.0092195
CCDC153	coiled-coil domain containing 153	-2.2351	0.00050127
IL6R	interleukin 6 receptor	-2.2301	0.00141
FUT1	fucosyltransferase 1 (H blood group)	-2.2282	0.0016721
ITGA11	integrin subunit alpha 11	-2.2265	0.00052509
ACAA1	acetyl-CoA acyltransferase 1	-2.2264	0.0059852
FOS	"Fos proto-oncogene, AP-1 transcription factor subunit"	-2.2019	0.034358
ZNF573	zinc finger protein 573	-2.1988	0.00020737
FAM162A	family with sequence similarity 162 member A	-2.1921	0.011701
NOD2	nucleotide binding oligomerization domain containing 2	-2.189	0.026277
HSPB2	heat shock protein family B (small) member 2	-2.1812	0.00080734
ANXA2R	annexin A2 receptor	-2.1795	0.025684
KBTBD8	kelch repeat and BTB domain containing 8	-2.1789	0.0002792
TFAP2A	transcription factor AP-2 alpha	-2.1735	0.00027889
MTUS1	microtubule associated scaffold protein 1	-2.1726	0.0079738
LAPTM5	lysosomal protein transmembrane 5	-2.1635	0.010775
TACSTD2	tumor associated calcium signal transducer 2	-2.1603	0.010567
ABCA8	ATP binding cassette subfamily A member 8	-2.1551	0.010699
CDIP1	cell death inducing p53 target 1	-2.1522	0.0022116
RIPK3	receptor interacting serine/threonine kinase 3	-2.1452	0.00060068
ZNF14	zinc finger protein 14	-2.14	0.00023491
RFTN1	"raftlin, lipid raft linker 1"	-2.1307	0.0020224
CCNI2	cyclin I family member 2	-2.1304	0.0019563
TP53I11	tumor protein p53 inducible protein 11	-2.1278	0.005006
MST1R	macrophage stimulating 1 receptor	-2.1188	0.00019953
ADAMTS4	ADAM metallopeptidase with thrombospondin type 1 motif 4	-2.1113	0.0033743
GPR87	G protein-coupled receptor 87	-2.1078	0.0018224
PTK7	protein tyrosine kinase 7 (inactive)	-2.1009	0.0022151
TMEM130	transmembrane protein 130	-2.0941	0.00077374
PGBD3	piggyBac transposable element derived 3	-2.0939	0.0076652
ENTPD1	ectonucleoside triphosphate diphosphohydrolase 1	-2.0885	0.00038018
STK32B	serine/threonine kinase 32B	-2.0875	0.021619
FAXC	"failed axon connections homolog, metaxin like GST domain containing"	-2.0791	0.033026
MCOLN2	mucolipin 2	-2.0782	0.04621
CPS1	carbamoyl-phosphate synthase 1	-2.0686	0.032385
CTDSPL	CTD small phosphatase like	-2.0674	0.021337
RUNX3	RUNX family transcription factor 3	-2.0613	0.00019639
LOC730183	uncharacterized LOC730183	-2.0599	0.003724
NICN1	nicolin 1	-2.0483	0.0083619
CHMP2B	charged multivesicular body protein 2B	-2.0423	0.049495
SLC4A11	solute carrier family 4 member 11	-2.0376	0.00028373
HHEX	hematopoietically expressed homeobox	-2.0317	0.035148
SLC43A2	solute carrier family 43 member 2	-2.0255	0.0046552
PRSS23	serine protease 23	-2.0159	0.014245
BGN	biglycan	-2.0108	0.0033723
PLP1	proteolipid protein 1	-1.9945	0.00079771
FAM117A	family with sequence similarity 117 member A	-1.9939	0.0012993
ALDH1A3	aldehyde dehydrogenase 1 family member A3	-1.9817	0.00086378
LIPG	"lipase G, endothelial type"	-1.9722	0.00073255
CMTM7	CKLF like MARVEL transmembrane domain containing 7	-1.9721	0.00075727
ARMS2	age-related maculopathy susceptibility 2	-1.9713	0.0028791
SOX7	SRY-box transcription factor 7	-1.9601	0.028634
CEMIP	cell migration inducing hyaluronidase 1	-1.959	0.012285
ABCB1	ATP binding cassette subfamily B member 1	-1.9466	0.019506
ZG16B	zymogen granule protein 16B	-1.9401	0.002687
RLN2	relaxin 2	-1.9364	0.039702
CASP12	caspase 12 (gene/pseudogene)	-1.9358	0.0055764
TM4SF18	transmembrane 4 L six family member 18	-1.9349	0.0030634
PIPOX	pipecolic acid and sarcosine oxidase	-1.9317	0.0014558
RGS5	regulator of G protein signaling 5	-1.9308	0.0043639
HACL1	2-hydroxyacyl-CoA lyase 1	-1.9286	0.0017739
TRMT10C	"tRNA methyltransferase 10C, mitochondrial RNase P subunit"	-1.9189	0.0015505
AGPAT5	1-acylglycerol-3-phosphate O-acyltransferase 5	-1.9115	0.00016739
CCDC81	coiled-coil domain containing 81	-1.9077	0.039166
IGFBP7	insulin like growth factor binding protein 7	-1.9073	0.012921
ZNF660	zinc finger protein 660	-1.9057	0.02151
SPOCK2	"SPARC (osteonectin), cwcv and kazal like domains proteoglycan 2"	-1.9019	0.047386
ITIH3	inter-alpha-trypsin inhibitor heavy chain 3	-1.8982	0.0020021
TKT	transketolase	-1.8951	0.00026914
TLR4	toll like receptor 4	-1.8842	0.0092195
ADPRH	ADP-ribosylarginine hydrolase	-1.8828	0.0031527
APOBEC2	apolipoprotein B mRNA editing enzyme catalytic subunit 2	-1.8794	0.0077294
SORT1	sortilin 1	-1.8792	0.027415
MAP3K9	mitogen-activated protein kinase kinase kinase 9	-1.8785	0.00013907
KIAA1211L	KIAA1211 like	-1.8765	0.0080076
NEBL	nebulette	-1.8759	0.035148
LMOD1	leiomodin 1	-1.868	0.0054525
FAM189A2	family with sequence similarity 189 member A2	-1.8678	0.02479
LTF	lactotransferrin	-1.866	0.02466
GHRLOS	ghrelin opposite strand/antisense RNA	-1.8655	0.0032913
LRRC70	leucine rich repeat containing 70	-1.8649	0.0025774
B3GALT2	"beta-1,3-galactosyltransferase 2"	-1.8627	0.010414
SNORD116-19	"small nucleolar RNA, C/D box 116-19"	-1.8604	0.0069915
YPEL2	yippee like 2	-1.8546	0.003172
MAP3K8	mitogen-activated protein kinase kinase kinase 8	-1.8505	0.0029485
FBLIM1	filamin binding LIM protein 1	-1.8441	0.012296
AEBP1	AE binding protein 1	-1.8142	0.029601
CNOT10	CCR4-NOT transcription complex subunit 10	-1.8104	0.0038665
BTBD16	BTB domain containing 16	-1.8102	0.00035501
SIM1	SIM bHLH transcription factor 1	-1.8065	0.038649
JAG1	jagged canonical Notch ligand 1	-1.8057	0.0024456
SNAI1	snail family transcriptional repressor 1	-1.8041	0.046349
PRKCH	protein kinase C eta	-1.8007	0.015461
FMO2	flavin containing dimethylaniline monoxygenase 2	-1.7998	0.0045517
KCNE3	potassium voltage-gated channel subfamily E regulatory subunit 3	-1.7948	0.015111
KRT16P2	keratin 16 pseudogene 2	-1.7946	0.00027377
CARD17	caspase recruitment domain family member 17	-1.793	0.017505
INPP5J	inositol polyphosphate-5-phosphatase J	-1.7929	0.010567
RAMP1	receptor activity modifying protein 1	-1.7924	0.015172
SLITRK3	SLIT and NTRK like family member 3	-1.7905	0.024225
COX17	cytochrome c oxidase copper chaperone COX17	-1.7903	0.00021061
DENND2D	DENN domain containing 2D	-1.7881	0.0075975
SPICE1	spindle and centriole associated protein 1	-1.7865	0.00080532
METTL25	methyltransferase like 25	-1.7817	0.035634
PDGFA	platelet derived growth factor subunit A	-1.7814	0.0061138
TYRP1	tyrosinase related protein 1	-1.778	0.0080831
UBP1	upstream binding protein 1	-1.7738	0.00039994
TMA7	translation machinery associated 7 homolog	-1.7737	0.0020361
BMF	Bcl2 modifying factor	-1.7736	0.0004841
EDA2R	ectodysplasin A2 receptor	-1.7649	0.0036725
KPNA1	karyopherin subunit alpha 1	-1.7627	0.00038648
MEF2C	myocyte enhancer factor 2C	-1.761	0.016018
ESAM	endothelial cell adhesion molecule	-1.7601	0.031337
PHGDH	phosphoglycerate dehydrogenase	-1.7501	0.00041326
RHOB	ras homolog family member B	-1.7491	0.0038104
LAG3	lymphocyte activating 3	-1.7411	0.0020825
PALD1	phosphatase domain containing paladin 1	-1.7403	0.0033743
COL4A6	collagen type IV alpha 6 chain	-1.736	0.0022044
COL4A5	collagen type IV alpha 5 chain	-1.7319	0.00044608
THUMPD3-AS1	THUMPD3 antisense RNA 1	-1.7243	0.00206
DMD	dystrophin	-1.7228	0.0013015
ZC4H2	zinc finger C4H2-type containing	-1.7217	0.013167
PHF7	PHD finger protein 7	-1.72	0.00064064
ASIC1	acid sensing ion channel subunit 1	-1.7168	0.0032913
LTB	lymphotoxin beta	-1.711	0.018842
CHRNB1	cholinergic receptor nicotinic beta 1 subunit	-1.71	0.0018332
PRKXP1	PRKX pseudogene 1	-1.7084	0.00033744
ALCAM	activated leukocyte cell adhesion molecule	-1.7062	0.00035844
LPCAT2	lysophosphatidylcholine acyltransferase 2	-1.7046	0.0092195
IFNGR1	interferon gamma receptor 1	-1.7037	0.013752
SNX32	sorting nexin 32	-1.7016	0.012799
JUP	junction plakoglobin	-1.6984	0.0070319
FABP3	fatty acid binding protein 3	-1.6957	0.017866
SOX17	SRY-box transcription factor 17	-1.6938	0.001816
KIAA1549	KIAA1549	-1.6933	0.0019222
HCLS1	hematopoietic cell-specific Lyn substrate 1	-1.6869	0.0020906
HYAL1	hyaluronidase 1	-1.6751	0.020948
CA9	carbonic anhydrase 9	-1.6747	0.0096006
NANOS3	nanos C2HC-type zinc finger 3	-1.6694	0.00080822
TIMP4	TIMP metallopeptidase inhibitor 4	-1.6628	0.0015246
ZNF571	zinc finger protein 571	-1.6583	0.00049187
THSD1	thrombospondin type 1 domain containing 1	-1.6562	0.006536
FLNB	filamin B	-1.6549	0.027933
TREX1	three prime repair exonuclease 1	-1.6527	0.032686
TSPAN18	tetraspanin 18	-1.6526	0.0070045
ZNF662	zinc finger protein 662	-1.6525	0.0022626
ZBTB46	zinc finger and BTB domain containing 46	-1.649	0.012242
CAPN7	calpain 7	-1.6489	0.0049772
LPAR5	lysophosphatidic acid receptor 5	-1.6483	0.026285
MSRA	methionine sulfoxide reductase A	-1.6428	0.016097
SLC25A20	solute carrier family 25 member 20	-1.639	0.0028986
SYNM	synemin	-1.6389	0.00081744
DPEP2	dipeptidase 2	-1.6326	0.0079732
INSR	insulin receptor	-1.6309	0.0030341
ARHGAP6	Rho GTPase activating protein 6	-1.6282	0.0015986
COL1A2	collagen type I alpha 2 chain	-1.6281	0.037575
C3AR1	complement C3a receptor 1	-1.6206	0.019669
CYS1	cystin 1	-1.62	0.0047611
SMIM4	small integral membrane protein 4	-1.6174	0.0010998
CD93	CD93 molecule	-1.617	0.0042708
COL5A2	collagen type V alpha 2 chain	-1.6145	0.0093272
FLI1	"Fli-1 proto-oncogene, ETS transcription factor"	-1.6117	0.003172
IRF6	interferon regulatory factor 6	-1.6112	0.015723
PCYOX1L	prenylcysteine oxidase 1 like	-1.6099	0.048555
DAB2	DAB adaptor protein 2	-1.6083	0.013079
CSRNP1	cysteine and serine rich nuclear protein 1	-1.6075	0.0024608
EID3	EP300 interacting inhibitor of differentiation 3	-1.607	0.00048785
FEZ1	fasciculation and elongation protein zeta 1	-1.6042	0.045562
EOGT	EGF domain specific O-linked N-acetylglucosamine transferase	-1.594	0.0075518
ACVR2B	activin A receptor type 2B	-1.5936	0.0054525
CMTM6	CKLF like MARVEL transmembrane domain containing 6	-1.5927	0.0028662
ZNF253	zinc finger protein 253	-1.5906	0.0030341
GRAP	GRB2 related adaptor protein	-1.5886	0.035364
MEGF9	multiple EGF like domains 9	-1.5883	0.00058971
RAB15	"RAB15, member RAS oncogene family"	-1.5865	0.0018332
RHPN1	rhophilin Rho GTPase binding protein 1	-1.5841	0.0070045
CELSR3	cadherin EGF LAG seven-pass G-type receptor 3	-1.5828	0.0017749
PLCG2	phospholipase C gamma 2	-1.5825	0.037954
EFHB	EF-hand domain family member B	-1.5814	0.0018589
LOC644189	acyl-CoA thioesterase 4 pseudogene	-1.5812	0.04533
ZNF30	zinc finger protein 30	-1.5809	0.015633
C11orf52	chromosome 11 open reading frame 52	-1.575	0.003172
TPM1	tropomyosin 1	-1.5745	0.047364
DSC3	desmocollin 3	-1.5738	0.0066116
HRK	"harakiri, BCL2 interacting protein"	-1.5724	0.0024987
MVB12B	multivesicular body subunit 12B	-1.572	0.039422
LAMB2	laminin subunit beta 2	-1.5716	0.011761
SGK1	serum/glucocorticoid regulated kinase 1	-1.5712	0.022928
CHI3L1	chitinase 3 like 1	-1.5706	0.005741
CD52	CD52 molecule	-1.5688	0.0021823
NFATC4	nuclear factor of activated T cells 4	-1.5653	0.00114
TIMM8B	translocase of inner mitochondrial membrane 8 homolog B	-1.5646	0.000308
TCF4	transcription factor 4	-1.5606	0.046958
TMEM43	transmembrane protein 43	-1.5582	0.00083471
PURG	purine rich element binding protein G	-1.5569	0.020174
VGLL3	vestigial like family member 3	-1.5544	0.023537
DIXDC1	DIX domain containing 1	-1.5535	0.00079771
NDRG1	N-myc downstream regulated 1	-1.553	0.0036337
WSCD1	WSC domain containing 1	-1.5409	0.045284
MLH1	mutL homolog 1	-1.5369	0.0033743
ERMP1	endoplasmic reticulum metallopeptidase 1	-1.5347	0.0075206
ARHGAP26	Rho GTPase activating protein 26	-1.5335	0.0045578
ZNF433	zinc finger protein 433	-1.5303	0.00063663
ICA1	islet cell autoantigen 1	-1.5233	0.0030468
COL18A1	collagen type XVIII alpha 1 chain	-1.5232	0.00038825
RGS11	regulator of G protein signaling 11	-1.5193	0.00102
TSTA3	tissue specific transplantation antigen P35B	-1.5191	0.0020361
SUSD5	sushi domain containing 5	-1.5108	0.010371
TRAIP	TRAF interacting protein	-1.5107	0.0011078
CCNJL	cyclin J like	-1.509	0.023779
C17orf107	chromosome 17 open reading frame 107	-1.5064	0.0018224
CFP	complement factor properdin	-1.5061	0.0020361
IL3RA	interleukin 3 receptor subunit alpha	-1.5015	0.0078948
STMN3	stathmin 3	-1.5013	0.035461
THY1	Thy-1 cell surface antigen	-1.5011	0.0020629
LYPD1	LY6/PLAUR domain containing 1	-1.4947	0.0022044
CARD16	caspase recruitment domain family member 16	-1.4938	0.020834
MFAP2	microfibril associated protein 2	-1.4889	0.0021043
HAPLN2	hyaluronan and proteoglycan link protein 2	-1.4878	0.02479
SULT1A4	sulfotransferase family 1A member 4	-1.4873	0.0018841
SLMAP	sarcolemma associated protein	-1.4842	0.00082978
CSMD3	CUB and Sushi multiple domains 3	-1.4834	0.0022116
TDRD10	tudor domain containing 10	-1.4807	0.0066777
LINC00921	long intergenic non-protein coding RNA 921	-1.4787	0.0066044
ZNF569	zinc finger protein 569	-1.4784	0.0016976
PDCD4-AS1	PDCD4 antisense RNA 1	-1.4784	0.011154
CLASP2	cytoplasmic linker associated protein 2	-1.4755	0.00080734
UBE2V2	ubiquitin conjugating enzyme E2 V2	-1.4724	0.019789
HES4	hes family bHLH transcription factor 4	-1.4715	0.023037
TAMM41	TAM41 mitochondrial translocator assembly and maintenance homolog	-1.47	0.0022116
APPL1	"adaptor protein, phosphotyrosine interacting with PH domain and leucine zipper 1"	-1.4673	0.0063934
DLL3	delta like canonical Notch ligand 3	-1.4672	0.017778
PDCD6IP	programmed cell death 6 interacting protein	-1.4648	0.001783
ZNF439	zinc finger protein 439	-1.4636	0.0019563
ANKRD2	ankyrin repeat domain 2	-1.4592	0.01105
PHACTR2	phosphatase and actin regulator 2	-1.4573	0.022873
DOCK9	dedicator of cytokinesis 9	-1.4558	0.0085317
TMEM89	transmembrane protein 89	-1.4534	0.0036214
TMEM45B	transmembrane protein 45B	-1.4504	0.044544
CEACAM1	CEA cell adhesion molecule 1	-1.4497	0.005915
CNTNAP3	contactin associated protein family member 3	-1.4404	0.0073963
PDP1	pyruvate dehyrogenase phosphatase catalytic subunit 1	-1.4399	0.041395
SCAMP5	secretory carrier membrane protein 5	-1.4385	0.0092345
CTSZ	cathepsin Z	-1.4377	0.0070319
ZKSCAN7	zinc finger with KRAB and SCAN domains 7	-1.4372	0.00095184
ZNF826P	"zinc finger protein 826, pseudogene"	-1.4361	0.010592
PRKCD	protein kinase C delta	-1.4356	0.0013337
FOXL2	forkhead box L2	-1.4355	0.0017208
EAF2	ELL associated factor 2	-1.435	0.0038345
GLB1	galactosidase beta 1	-1.4338	0.018225
CAMTA1	calmodulin binding transcription activator 1	-1.4324	0.022596
ABCG1	ATP binding cassette subfamily G member 1	-1.4317	0.025348
TBCEL	tubulin folding cofactor E like	-1.4274	0.020272
SKIL	SKI like proto-oncogene	-1.4257	0.0040685
SEMA4D	semaphorin 4D	-1.4246	0.00096813
TCEA3	transcription elongation factor A3	-1.4195	0.010329
NID1	nidogen 1	-1.419	0.0083123
PBRM1	polybromo 1	-1.4153	0.0022116
LYPLA1	lysophospholipase 1	-1.4152	0.023047
ASRGL1	asparaginase and isoaspartyl peptidase 1	-1.4143	0.0079713
TUSC1	tumor suppressor candidate 1	-1.4132	0.037451
EBLN2	endogenous Bornavirus like nucleoprotein 2	-1.4096	0.0043251
TMEM42	transmembrane protein 42	-1.4037	0.0018192
PRKX	protein kinase X-linked	-1.4018	0.00091878
ATP7B	ATPase copper transporting beta	-1.4017	0.0067589
PDIA5	protein disulfide isomerase family A member 5	-1.3948	0.0027787
MRPS25	mitochondrial ribosomal protein S25	-1.3913	0.00097027
CHD7	chromodomain helicase DNA binding protein 7	-1.3911	0.009575
C1QL1	complement C1q like 1	-1.3886	0.045151
KCNT2	potassium sodium-activated channel subfamily T member 2	-1.3879	0.0011788
CBX2	chromobox 2	-1.3859	0.0028023
ZNF626	zinc finger protein 626	-1.3834	0.0020441
DCP1A	decapping mRNA 1A	-1.3826	0.004052
TRNT1	tRNA nucleotidyl transferase 1	-1.3821	0.00093264
HIVEP1	HIVEP zinc finger 1	-1.3816	0.0024913
ABCC3	ATP binding cassette subfamily C member 3	-1.3798	0.010736
PRKAR2A	protein kinase cAMP-dependent type II regulatory subunit alpha	-1.3779	0.0053983
PSG9	pregnancy specific beta-1-glycoprotein 9	-1.3758	0.013261
TMEM25	transmembrane protein 25	-1.3754	0.019133
MIA	MIA SH3 domain containing	-1.3687	0.0030751
CAMK1D	calcium/calmodulin dependent protein kinase ID	-1.3686	0.046377
CHSY1	chondroitin sulfate synthase 1	-1.3681	0.0013048
SLC25A29	solute carrier family 25 member 29	-1.3648	0.0020571
IGF1R	insulin like growth factor 1 receptor	-1.3629	0.004716
MICALCL	MICAL C-terminal like	-1.358	0.0052883
GSN	gelsolin	-1.3573	0.0032382
KCTD16	potassium channel tetramerization domain containing 16	-1.3533	0.0031748
NNMT	nicotinamide N-methyltransferase	-1.352	0.005223
TMEM40	transmembrane protein 40	-1.3512	0.0036189
ACAT1	acetyl-CoA acetyltransferase 1	-1.35	0.00074064
CPNE5	copine 5	-1.3498	0.008091
SLC26A6	solute carrier family 26 member 6	-1.3474	0.0020952
TTYH3	tweety family member 3	-1.345	0.021814
VASH1	vasohibin 1	-1.3436	0.0012976
PAQR6	progestin and adipoQ receptor family member 6	-1.3422	0.010468
WDR82	WD repeat domain 82	-1.3417	0.0019222
MEIS1	Meis homeobox 1	-1.34	0.0010968
PRSS57	serine protease 57	-1.3395	0.0039771
B4GALT5	"beta-1,4-galactosyltransferase 5"	-1.3375	0.022421
TGS1	trimethylguanosine synthase 1	-1.3372	0.019596
UBE4A	ubiquitination factor E4A	-1.3359	0.0045058
ARHGAP27	Rho GTPase activating protein 27	-1.3333	0.0133
NKTR	natural killer cell triggering receptor	-1.3325	0.00059482
UCN2	urocortin 2	-1.3313	0.026373
TMPPE	transmembrane protein with metallophosphoesterase domain	-1.3299	0.022318
CBL	Cbl proto-oncogene	-1.3288	0.018678
PARP14	poly(ADP-ribose) polymerase family member 14	-1.3269	0.0072507
SEMA3D	semaphorin 3D	-1.3257	0.037486
STK10	serine/threonine kinase 10	-1.3232	0.024961
PARP15	poly(ADP-ribose) polymerase family member 15	-1.323	0.0071016
TMEM135	transmembrane protein 135	-1.3227	0.041155
ARIH2OS	ARIH2 opposite strand lncRNA	-1.3192	0.0020361
LARS2	"leucyl-tRNA synthetase 2, mitochondrial"	-1.3171	0.0028269
POGLUT1	protein O-glucosyltransferase 1	-1.3144	0.0094759
TUSC2	"tumor suppressor 2, mitochondrial calcium regulator"	-1.3143	0.0049772
LZTFL1	leucine zipper transcription factor like 1	-1.3135	0.0047982
FSTL1	follistatin like 1	-1.3133	0.047364
ANXA3	annexin A3	-1.3132	0.042496
KCTD20	potassium channel tetramerization domain containing 20	-1.3131	0.0056461
SACM1L	SAC1 like phosphatidylinositide phosphatase	-1.3125	0.003625
DLAT	dihydrolipoamide S-acetyltransferase	-1.3112	0.0028576
PCBP4	poly(rC) binding protein 4	-1.3083	0.0079457
SKIDA1	SKI/DACH domain containing 1	-1.3082	0.012495
DMTN	dematin actin binding protein	-1.3077	0.012173
SLC16A4	solute carrier family 16 member 4	-1.3073	0.0053633
RYR3	ryanodine receptor 3	-1.3039	0.0076082
COLQ	collagen like tail subunit of asymmetric acetylcholinesterase	-1.3038	0.036058
ENTPD8	ectonucleoside triphosphate diphosphohydrolase 8	-1.3023	0.0050606
USP9X	ubiquitin specific peptidase 9 X-linked	-1.3016	0.014675
GOLT1A	golgi transport 1A	-1.3009	0.033624
CCDC174	coiled-coil domain containing 174	-1.3006	0.0024317
PACS2	phosphofurin acidic cluster sorting protein 2	-1.3001	0.020639
NRADDP	"neurotrophin receptor associated death domain, pseudogene"	-1.2985	0.0095229
NLRX1	NLR family member X1	-1.2973	0.0020805
IER5L	immediate early response 5 like	-1.2941	0.013356
ITPKB	inositol-trisphosphate 3-kinase B	-1.2935	0.013261
LINC00607	long intergenic non-protein coding RNA 607	-1.2911	0.046
DYNC1LI1	dynein cytoplasmic 1 light intermediate chain 1	-1.2905	0.0011788
GRM2	glutamate metabotropic receptor 2	-1.286	0.000597
APOL3	apolipoprotein L3	-1.2859	0.001761
FANCD2	FA complementation group D2	-1.2858	0.0033228
HYAL2	hyaluronidase 2	-1.2852	0.015477
SUMF1	sulfatase modifying factor 1	-1.2837	0.0033743
PTK2B	protein tyrosine kinase 2 beta	-1.2823	0.038412
NOTCH3	notch receptor 3	-1.2822	0.032885
FOXL2NB	FOXL2 neighbor	-1.2818	0.0055139
MEF2A	myocyte enhancer factor 2A	-1.2816	0.007562
TIMMDC1	translocase of inner mitochondrial membrane domain containing 1	-1.2788	0.0010533
OXSM	"3-oxoacyl-ACP synthase, mitochondrial"	-1.2784	0.0019501
MOCS1	molybdenum cofactor synthesis 1	-1.2718	0.0071433
SS18L2	SS18 like 2	-1.271	0.00081509
YTHDF3	YTH N6-methyladenosine RNA binding protein 3	-1.2675	0.0034714
CHRNA7	cholinergic receptor nicotinic alpha 7 subunit	-1.2646	0.034819
ABHD6	abhydrolase domain containing 6	-1.2633	0.001574
PDHB	pyruvate dehydrogenase E1 subunit beta	-1.2616	0.001532
KIF9-AS1	KIF9 antisense RNA 1	-1.2586	0.0043721
MST1L	macrophage stimulating 1 like	-1.2565	0.030216
TNNC1	"troponin C1, slow skeletal and cardiac type"	-1.2564	0.02205
SLC22A18AS	solute carrier family 22 member 18 antisense	-1.2558	0.012821
SCARF1	scavenger receptor class F member 1	-1.2555	0.028354
FGF11	fibroblast growth factor 11	-1.2555	0.035877
ZNF738	zinc finger protein 738	-1.2554	0.0021694
IFFO2	intermediate filament family orphan 2	-1.2554	0.015461
PDCD4	programmed cell death 4	-1.2519	0.003724
CUL5	cullin 5	-1.2508	0.0053603
ELP6	elongator acetyltransferase complex subunit 6	-1.2505	0.0022626
ADCY4	adenylate cyclase 4	-1.2504	0.044351
PELI1	pellino E3 ubiquitin protein ligase 1	-1.2483	0.023678
BSN	bassoon presynaptic cytomatrix protein	-1.2471	0.0075206
SCHIP1	schwannomin interacting protein 1	-1.2459	0.0040685
CCDC180	coiled-coil domain containing 180	-1.2451	0.0042597
GRAMD1B	GRAM domain containing 1B	-1.2443	0.00091878
PIK3C2A	phosphatidylinositol-4-phosphate 3-kinase catalytic subunit type 2 alpha	-1.2427	0.0015312
FAM76B	family with sequence similarity 76 member B	-1.2427	0.0020361
SLC9A3R2	SLC9A3 regulator 2	-1.2423	0.034819
PTPRB	protein tyrosine phosphatase receptor type B	-1.2411	0.00733
HIP1R	huntingtin interacting protein 1 related	-1.2388	0.012302
TMEM31	transmembrane protein 31	-1.238	0.049199
LSM3	"LSM3 homolog, U6 small nuclear RNA and mRNA degradation associated"	-1.2361	0.0020361
ACTR8	actin related protein 8	-1.2347	0.006335
BUD13	BUD13 homolog	-1.2346	0.0070074
GLYCTK	glycerate kinase	-1.2305	0.0043027
NOVA2	NOVA alternative splicing regulator 2	-1.2276	0.0069443
SP6	Sp6 transcription factor	-1.2254	0.0041813
HESX1	HESX homeobox 1	-1.2239	0.0022151
SPCS1	signal peptidase complex subunit 1	-1.2231	0.042767
C6orf226	chromosome 6 open reading frame 226	-1.2219	0.018846
RPL22L1	ribosomal protein L22 like 1	-1.221	0.0046259
MANF	mesencephalic astrocyte derived neurotrophic factor	-1.2203	0.015461
MYH10	myosin heavy chain 10	-1.2201	0.019823
SLC20A2	solute carrier family 20 member 2	-1.218	0.017315
HIGD1A	HIG1 hypoxia inducible domain family member 1A	-1.2177	0.0016337
FAXDC2	fatty acid hydroxylase domain containing 2	-1.2159	0.028155
ATP6V1A	ATPase H+ transporting V1 subunit A	-1.2156	0.0022116
RPL27A	ribosomal protein L27a	-1.2152	0.0045289
CCR10	C-C motif chemokine receptor 10	-1.2137	0.005006
E2F2	E2F transcription factor 2	-1.2132	0.041441
SLC35A5	solute carrier family 35 member A5	-1.213	0.0013048
MAMDC2	MAM domain containing 2	-1.2124	0.0050622
HBB	hemoglobin subunit beta	-1.2086	0.023886
OR7G1	olfactory receptor family 7 subfamily G member 1	-1.2072	0.0016611
TRAK1	trafficking kinesin protein 1	-1.2042	0.0054525
GTF2E1	general transcription factor IIE subunit 1	-1.2035	0.0012729
KAT2B	lysine acetyltransferase 2B	-1.2015	0.0071355
MUSTN1	"musculoskeletal, embryonic nuclear protein 1"	-1.201	0.0030671
TADA3	transcriptional adaptor 3	-1.1998	0.0062523
CPOX	coproporphyrinogen oxidase	-1.1997	0.0063595
LRCH2	leucine rich repeats and calponin homology domain containing 2	-1.1997	0.026772
C1QTNF6	C1q and TNF related 6	-1.1992	0.010914
NSUN3	NOP2/Sun RNA methyltransferase 3	-1.1989	0.011699
PIANP	PILR alpha associated neural protein	-1.1978	0.010157
SDHD	succinate dehydrogenase complex subunit D	-1.197	0.015675
EXOC6	exocyst complex component 6	-1.1952	0.0043251
TBC1D12	TBC1 domain family member 12	-1.1947	0.0069487
GSK3B	glycogen synthase kinase 3 beta	-1.1917	0.015628
FAM110C	family with sequence similarity 110 member C	-1.1896	0.036935
APOB	apolipoprotein B	-1.1888	0.0081103
LOC729870	uncharacterized LOC729870	-1.1881	0.027754
HEG1	heart development protein with EGF like domains 1	-1.187	0.028059
CCNE2	cyclin E2	-1.187	0.039507
EIF1B	eukaryotic translation initiation factor 1B	-1.1869	0.0045058
CHST9	carbohydrate sulfotransferase 9	-1.1866	0.010699
CMC1	C-X9-C motif containing 1	-1.1862	0.002307
ZNF621	zinc finger protein 621	-1.186	0.0016114
MTMR2	myotubularin related protein 2	-1.1855	0.0023129
ZFHX3	zinc finger homeobox 3	-1.1829	0.041237
ABHD14A	abhydrolase domain containing 14A	-1.1828	0.0046259
ZNF93	zinc finger protein 93	-1.1825	0.0066327
NISCH	nischarin	-1.1813	0.028988
KIAA1143	KIAA1143	-1.1809	0.023005
SLC7A11	solute carrier family 7 member 11	-1.1804	0.033026
OFD1	OFD1 centriole and centriolar satellite protein	-1.1793	0.010275
TYMSOS	TYMS opposite strand	-1.1791	0.006986
RPL29P2	ribosomal protein L29 pseudogene 2	-1.1779	0.0017005
ZFPM2	"zinc finger protein, FOG family member 2"	-1.1776	0.0041184
PPP1R16B	protein phosphatase 1 regulatory subunit 16B	-1.177	0.0135
SMARCC1	"SWI/SNF related, matrix associated, actin dependent regulator of chromatin subfamily c member 1"	-1.1768	0.0099848
CREBRF	CREB3 regulatory factor	-1.1761	0.0080417
KLHL18	kelch like family member 18	-1.1752	0.0036521
ZNF35	zinc finger protein 35	-1.1741	0.0022523
ZNF654	zinc finger protein 654	-1.1723	0.0094229
AMT	aminomethyltransferase	-1.1719	0.011077
ZNF790	zinc finger protein 790	-1.1698	0.030624
KCNIP1	potassium voltage-gated channel interacting protein 1	-1.1694	0.0035856
SENP7	SUMO specific peptidase 7	-1.1686	0.003495
KLF2	Kruppel like factor 2	-1.1643	0.018842
RMRP	RNA component of mitochondrial RNA processing endoribonuclease	-1.1641	0.019494
P4HTM	"prolyl 4-hydroxylase, transmembrane"	-1.1607	0.0096928
ITPK1-AS1	ITPK1 antisense RNA 1	-1.1607	0.030216
CHCHD4	coiled-coil-helix-coiled-coil-helix domain containing 4	-1.1603	0.0013486
GDAP1	ganglioside induced differentiation associated protein 1	-1.16	0.027248
NFYB	nuclear transcription factor Y subunit beta	-1.1599	0.0020935
SNHG9	small nucleolar RNA host gene 9	-1.1582	0.013602
PDE12	phosphodiesterase 12	-1.1568	0.0030672
NGLY1	N-glycanase 1	-1.1564	0.0041184
SNORD3B-1	"small nucleolar RNA, C/D box 3B-1"	-1.155	0.0054525
KLK1	kallikrein 1	-1.1529	0.048536
CAND2	cullin associated and neddylation dissociated 2 (putative)	-1.1526	0.0030044
RASSF1	Ras association domain family member 1	-1.1523	0.0069723
RPP14	ribonuclease P/MRP subunit p14	-1.1517	0.0023129
FERMT2	fermitin family member 2	-1.1513	0.0083624
MGST2	microsomal glutathione S-transferase 2	-1.1476	0.018691
ARHGEF16	Rho guanine nucleotide exchange factor 16	-1.1475	0.038384
RAD18	RAD18 E3 ubiquitin protein ligase	-1.1474	0.0028986
GLIPR2	GLI pathogenesis related 2	-1.1472	0.011792
ZNF852	zinc finger protein 852	-1.1471	0.0047618
GNL3	G protein nucleolar 3	-1.1458	0.0099848
ITPR2	"inositol 1,4,5-trisphosphate receptor type 2"	-1.1449	0.0020052
PLLP	plasmolipin	-1.1427	0.037955
QRICH1	glutamine rich 1	-1.1423	0.0015875
MECOM	MDS1 and EVI1 complex locus	-1.1416	0.0028576
CEP97	centrosomal protein 97	-1.1397	0.0061138
C15orf54	chromosome 15 putative open reading frame 54	-1.1393	0.039392
TNFRSF10A	TNF receptor superfamily member 10a	-1.1392	0.011791
SLC12A2	solute carrier family 12 member 2	-1.1391	0.019802
HAS3	hyaluronan synthase 3	-1.139	0.0099182
MAGI1	"membrane associated guanylate kinase, WW and PDZ domain containing 1"	-1.1388	0.012311
CHST12	carbohydrate sulfotransferase 12	-1.1387	0.046483
EED	embryonic ectoderm development	-1.1347	0.0044873
BFSP1	beaded filament structural protein 1	-1.1325	0.0070603
EEF2K	eukaryotic elongation factor 2 kinase	-1.1312	0.0047982
CKM	"creatine kinase, M-type"	-1.1258	0.021337
RPL29	ribosomal protein L29	-1.1257	0.0028713
GTPBP8	GTP binding protein 8 (putative)	-1.1242	0.0094603
NQO1	NAD(P)H quinone dehydrogenase 1	-1.1237	0.004796
ZNF43	zinc finger protein 43	-1.1221	0.015146
PSMD6	"proteasome 26S subunit, non-ATPase 6"	-1.1211	0.0076065
ZNF506	zinc finger protein 506	-1.1205	0.0061967
VAMP8	vesicle associated membrane protein 8	-1.118	0.015675
ATF3	activating transcription factor 3	-1.1175	0.0044889
MED14OS	MED14 opposite strand	-1.1171	0.0068128
YTHDC2	YTH domain containing 2	-1.1169	0.029438
TMF1	TATA element modulatory factor 1	-1.1147	0.0034491
PCDHB14	protocadherin beta 14	-1.1137	0.022819
TOP2B	DNA topoisomerase II beta	-1.1127	0.0052963
LINC00597	long intergenic non-protein coding RNA 597	-1.1125	0.046143
KLC3	kinesin light chain 3	-1.112	0.0059695
SEMA3F	semaphorin 3F	-1.112	0.045244
JUN	"Jun proto-oncogene, AP-1 transcription factor subunit"	-1.1102	0.0062129
PTS	6-pyruvoyltetrahydropterin synthase	-1.1097	0.0045113
CLCA2	chloride channel accessory 2	-1.1096	0.0098685
ACOX1	acyl-CoA oxidase 1	-1.1093	0.015002
EMC3	ER membrane protein complex subunit 3	-1.1087	0.0012569
CRIM1	cysteine rich transmembrane BMP regulator 1	-1.1084	0.044907
CMSS1	cms1 ribosomal small subunit homolog	-1.1061	0.0069051
CITED4	Cbp/p300 interacting transactivator with Glu/Asp rich carboxy-terminal domain 4	-1.1058	0.0034714
NR1I2	nuclear receptor subfamily 1 group I member 2	-1.1053	0.013246
ZDHHC3	zinc finger DHHC-type palmitoyltransferase 3	-1.0994	0.0042314
LOC283710	uncharacterized LOC283710	-1.0991	0.020734
RPL14	ribosomal protein L14	-1.0981	0.0028713
NDUFB4	NADH:ubiquinone oxidoreductase subunit B4	-1.097	0.0061971
UBTD2	ubiquitin domain containing 2	-1.0967	0.0061776
SARM1	sterile alpha and TIR motif containing 1	-1.0963	0.0058315
HYAL3	hyaluronidase 3	-1.0934	0.039077
IMPAD1	inositol monophosphatase domain containing 1	-1.0933	0.0021987
PCDH20	protocadherin 20	-1.0909	0.018846
DGAT1	diacylglycerol O-acyltransferase 1	-1.0897	0.016097
LOC101929089	uncharacterized LOC101929089	-1.0893	0.020766
LOC389641	uncharacterized LOC389641	-1.0886	0.015628
NRN1L	neuritin 1 like	-1.0885	0.0058889
ZSWIM7	zinc finger SWIM-type containing 7	-1.0872	0.0040685
ECHDC2	enoyl-CoA hydratase domain containing 2	-1.0868	0.006678
BTD	biotinidase	-1.0866	0.020529
ZNF620	zinc finger protein 620	-1.0865	0.0090116
FAM153B	family with sequence similarity 153 member B	-1.0859	0.0036521
ELL2	elongation factor for RNA polymerase II 2	-1.0856	0.025348
GBE1	"1,4-alpha-glucan branching enzyme 1"	-1.084	0.006335
KLF4	Kruppel like factor 4	-1.084	0.029201
CD86	CD86 molecule	-1.0838	0.018228
ARHGAP4	Rho GTPase activating protein 4	-1.0836	0.0079164
TLR3	toll like receptor 3	-1.083	0.031883
LOC91450	uncharacterized LOC91450	-1.0822	0.0096803
C2CD2L	C2CD2 like	-1.0813	0.0041485
ZBTB11	zinc finger and BTB domain containing 11	-1.0777	0.0021043
TCAF2	TRPM8 channel associated factor 2	-1.0774	0.026854
RBM5	RNA binding motif protein 5	-1.0767	0.0030708
SLC27A5	solute carrier family 27 member 5	-1.0764	0.02142
DMRTA1	DMRT like family A1	-1.0755	0.011064
RAB5A	"RAB5A, member RAS oncogene family"	-1.0744	0.0024572
CLDN1	claudin 1	-1.0742	0.028476
ZFP30	ZFP30 zinc finger protein	-1.0737	0.0062518
EPHA1-AS1	EPHA1 antisense RNA 1	-1.0736	0.033879
SENP6	SUMO specific peptidase 6	-1.0734	0.0043869
POSTN	periostin	-1.0714	0.044916
CENPV	centromere protein V	-1.0701	0.010069
LOC646976	translation initiation factor IF-2	-1.0692	0.015996
DOK4	docking protein 4	-1.0692	0.037964
ANO10	anoctamin 10	-1.0687	0.0069143
ZNF781	zinc finger protein 781	-1.0681	0.026735
FYCO1	FYVE and coiled-coil domain autophagy adaptor 1	-1.0677	0.0055813
PIK3R3	phosphoinositide-3-kinase regulatory subunit 3	-1.0653	0.0064844
XPC	"XPC complex subunit, DNA damage recognition and repair factor"	-1.0645	0.017995
SPATA24	spermatogenesis associated 24	-1.0633	0.0080417
FAM174B	family with sequence similarity 174 member B	-1.0618	0.039894
ZNF563	zinc finger protein 563	-1.0611	0.0061869
FAM27E2	family with sequence similarity 27 member E2	-1.0601	0.014245
APOE	apolipoprotein E	-1.0601	0.016657
SEC22A	"SEC22 homolog A, vesicle trafficking protein"	-1.06	0.0070074
PCDHGB7	"protocadherin gamma subfamily B, 7"	-1.0585	0.042711
MDM2	MDM2 proto-oncogene	-1.0571	0.0053983
GJD3	gap junction protein delta 3	-1.0571	0.0083306
RILPL2	Rab interacting lysosomal protein like 2	-1.0553	0.011075
C19orf18	chromosome 19 open reading frame 18	-1.0542	0.0055813
MRPL33	mitochondrial ribosomal protein L33	-1.0533	0.015574
PCNP	PEST proteolytic signal containing nuclear protein	-1.0531	0.0023885
RPL24	ribosomal protein L24	-1.0488	0.0072507
TXNRD1	thioredoxin reductase 1	-1.0474	0.035877
ARF4	ADP ribosylation factor 4	-1.0473	0.0043017
FOXO6	forkhead box O6	-1.0418	0.019507
REXO2	RNA exonuclease 2	-1.0413	0.0086295
ANKRD49	ankyrin repeat domain 49	-1.0396	0.0020906
CLK4	CDC like kinase 4	-1.0372	0.017829
TMEM30B	transmembrane protein 30B	-1.0368	0.041326
DAND5	DAN domain BMP antagonist family member 5	-1.0346	0.01536
HYLS1	HYLS1 centriolar and ciliogenesis associated	-1.0327	0.0042312
LOC440040	glutamate metabotropic receptor 5 pseudogene	-1.0327	0.041564
DLX4	distal-less homeobox 4	-1.0325	0.026946
TMSB4X	thymosin beta 4 X-linked	-1.0325	0.027895
RLN1	relaxin 1	-1.0325	0.035364
HERPUD1	homocysteine inducible ER protein with ubiquitin like domain 1	-1.0324	0.0066777
ADAM9	ADAM metallopeptidase domain 9	-1.0323	0.022535
CARD6	caspase recruitment domain family member 6	-1.0286	0.014644
HTR2B	5-hydroxytryptamine receptor 2B	-1.0275	0.018846
PIM1	"Pim-1 proto-oncogene, serine/threonine kinase"	-1.0263	0.021858
CEP295	centrosomal protein 295	-1.0257	0.0053168
CELSR2	cadherin EGF LAG seven-pass G-type receptor 2	-1.0247	0.015146
PRKAR1B	protein kinase cAMP-dependent type I regulatory subunit beta	-1.0233	0.020529
SFMBT1	Scm like with four mbt domains 1	-1.0216	0.0089377
GOLGB1	golgin B1	-1.0209	0.0067186
LRP5	LDL receptor related protein 5	-1.0202	0.040005
OTUD1	OTU deubiquitinase 1	-1.0196	0.049059
F11R	F11 receptor	-1.0189	0.0032302
PLEKHF2	pleckstrin homology and FYVE domain containing 2	-1.0171	0.041715
TMEM39A	transmembrane protein 39A	-1.0164	0.010914
DNAH5	dynein axonemal heavy chain 5	-1.0146	0.0076065
KLF10	Kruppel like factor 10	-1.0137	0.0079164
TRIB1	tribbles pseudokinase 1	-1.013	0.02831
REV3L	"REV3 like, DNA directed polymerase zeta catalytic subunit"	-1.013	0.038075
RASL11A	RAS like family 11 member A	-1.0127	0.022011
VAPB	VAMP associated protein B and C	-1.0104	0.0036521
LINC00316	long intergenic non-protein coding RNA 316	-1.01	0.0044184
GNAI2	G protein subunit alpha i2	-1.0096	0.049059
C10orf67	chromosome 10 open reading frame 67	-1.008	0.030595
TINAGL1	tubulointerstitial nephritis antigen like 1	-1.0079	0.038977
CLMN	calmin	-1.0072	0.019491
TP53INP1	tumor protein p53 inducible nuclear protein 1	-1.0059	0.015611
PPP1R12B	protein phosphatase 1 regulatory subunit 12B	-1.0036	0.018625
LOC729683	uncharacterized LOC729683	-1.0024	0.044289
