# Supplementary material for: RNF213 Loss-of-Function Promotes Angiogenesis of Cerebral Microvascular Endothelial Cells in a Cellular State Dependent Manner
Source: Cells. 2022 Dec 24;12(1):78. doi: 10.3390/cells12010078 (PMC9818782; doi:10.3390/cells12010078)
Supplement: Supplementary file 1 [file cells-12-00078-s001.zip › Table S3.xlsx]

## Sheet: Feuil1
Table S3: Most significantly up-regulated genes in confluent RNF213-deficient hCMEC/D3
Symbols	Name	Log (Fold Change)	Ajusted p-value
TNFAIP6	TNF alpha induced protein 6	6.1444	0.00043821
DCN	decorin	5.7399	9.1863e-06
CPE	carboxypeptidase E	5.5857	0.002963
PTPN13	protein tyrosine phosphatase non-receptor type 13	5.332	2.2997e-05
EREG	epiregulin	5.2545	0.00019814
EYA4	EYA transcriptional coactivator and phosphatase 4	5.1748	0.00011244
VNN1	vanin 1	4.8656	0.0025565
CH25H	cholesterol 25-hydroxylase	4.8186	0.0060176
KIAA0408	KIAA0408	4.808	0.0001869
LUM	lumican	4.739	2.8367e-05
HLA-DRB5	"major histocompatibility complex, class II, DR beta 5"	4.5902	0.0093751
KYNU	kynureninase	4.5345	0.012845
CPZ	carboxypeptidase Z	4.494	2.3134e-05
ANKRD29	ankyrin repeat domain 29	4.484	0.0067941
FAM155A	family with sequence similarity 155 member A	4.4598	0.00049409
HLA-DMB	"major histocompatibility complex, class II, DM beta"	4.3841	0.0047318
SLC39A8	solute carrier family 39 member 8	4.3248	5.6708e-05
ELOVL2	ELOVL fatty acid elongase 2	4.2446	0.00023682
DOCK11	dedicator of cytokinesis 11	4.2179	0.0026534
FZD7	frizzled class receptor 7	4.1977	1.0988e-06
TMEFF2	transmembrane protein with EGF like and two follistatin like domains 2	4.1549	0.00015242
RRAD	"RRAD, Ras related glycolysis inhibitor and calcium channel regulator"	4.1401	0.00047533
COL6A1	collagen type VI alpha 1 chain	4.1292	0.014071
PEG10	paternally expressed 10	4.0838	0.0031187
CLGN	calmegin	3.9905	0.0012308
FOXD1	forkhead box D1	3.9788	0.00015571
SLC4A4	solute carrier family 4 member 4	3.9715	0.00020393
MFSD2A	major facilitator superfamily domain containing 2A	3.9677	0.00052032
LIN7A	"lin-7 homolog A, crumbs cell polarity complex component"	3.9369	0.00023753
POPDC3	popeye domain containing 3	3.9167	0.00011196
TDO2	"tryptophan 2,3-dioxygenase"	3.896	5.2264e-06
ACSS3	acyl-CoA synthetase short chain family member 3	3.8874	0.00073134
CYP2J2	cytochrome P450 family 2 subfamily J member 2	3.8729	0.0060842
VNN2	vanin 2	3.7811	0.0022867
TOX2	TOX high mobility group box family member 2	3.7384	7.8662e-06
DMKN	dermokine	3.7335	3.0103e-05
FRZB	frizzled related protein	3.7333	6.0873e-05
ANTXR2	ANTXR cell adhesion molecule 2	3.6681	0.0022781
LAMA1	laminin subunit alpha 1	3.6644	0.0041948
AMPD3	adenosine monophosphate deaminase 3	3.6437	1.2883e-05
SOGA3	SOGA family member 3	3.614	0.00020566
ZCCHC24	zinc finger CCHC-type containing 24	3.6019	0.0027278
PTGES	prostaglandin E synthase	3.5784	0.00040979
CCL20	C-C motif chemokine ligand 20	3.5686	0.002788
PRDM1	PR/SET domain 1	3.5528	2.5364e-05
SLC9A9	solute carrier family 9 member A9	3.5231	4.6945e-05
SEMA7A	semaphorin 7A (John Milton Hagen blood group)	3.5163	6.5844e-06
FDCSP	follicular dendritic cell secreted protein	3.5088	5.8481e-05
ALX1	ALX homeobox 1	3.5084	1.0274e-05
PAMR1	peptidase domain containing associated with muscle regeneration 1	3.5035	0.0078077
PRKAA2	protein kinase AMP-activated catalytic subunit alpha 2	3.5034	4.2083e-05
NMNAT2	nicotinamide nucleotide adenylyltransferase 2	3.4919	0.00027671
FPR1	formyl peptide receptor 1	3.4779	6.6765e-05
TIGD2	tigger transposable element derived 2	3.4712	6.6765e-05
SLAIN1	SLAIN motif family member 1	3.4681	6.4215e-05
SLC25A27	solute carrier family 25 member 27	3.4527	0.00089207
MAN1A1	mannosidase alpha class 1A member 1	3.4475	0.016915
TM4SF19	transmembrane 4 L six family member 19	3.4431	0.00041694
UST	uronyl 2-sulfotransferase	3.4197	0.00057903
BANK1	B cell scaffold protein with ankyrin repeats 1	3.3964	1.3903e-05
CCNA1	cyclin A1	3.3908	4.589e-06
ADAMTS3	ADAM metallopeptidase with thrombospondin type 1 motif 3	3.3828	3.7361e-06
ABTB2	ankyrin repeat and BTB domain containing 2	3.3798	0.00046919
PNPLA3	patatin like phospholipase domain containing 3	3.3679	5.1447e-05
KLRC3	killer cell lectin like receptor C3	3.3485	0.001261
MEIS2	Meis homeobox 2	3.3393	0.00035474
P2RY6	pyrimidinergic receptor P2Y6	3.3194	0.00033497
AREG	amphiregulin	3.3078	0.003671
CSF2	colony stimulating factor 2	3.2968	0.028534
CAMK2N1	calcium/calmodulin dependent protein kinase II inhibitor 1	3.2251	0.00099822
NMU	neuromedin U	3.1911	0.0065279
ABCA12	ATP binding cassette subfamily A member 12	3.1578	9.9214e-05
G0S2	G0/G1 switch 2	3.1458	0.0046225
SRPX	sushi repeat containing protein X-linked	3.1409	0.016351
NBEA	neurobeachin	3.1142	0.0001115
BTC	betacellulin	3.1019	0.00047533
SLC1A3	solute carrier family 1 member 3	3.0951	1.3903e-05
UCHL1	ubiquitin C-terminal hydrolase L1	3.074	0.014571
SEL1L3	SEL1L family member 3	3.0629	0.020985
BHMT2	betaine--homocysteine S-methyltransferase 2	3.0481	0.003513
CD24	CD24 molecule	3.041	0.00040979
SBSN	suprabasin	3.0271	0.014156
CDA	cytidine deaminase	3.0266	0.00055432
QRFPR	pyroglutamylated RFamide peptide receptor	3.0193	1.0274e-05
TANC2	"tetratricopeptide repeat, ankyrin repeat and coiled-coil containing 2"	3.0184	0.00049409
MFAP4	microfibril associated protein 4	3.0178	0.0062582
DDIT4L	DNA damage inducible transcript 4 like	3.0015	1.3046e-05
DNM3	dynamin 3	2.9942	0.015831
NFE2	"nuclear factor, erythroid 2"	2.994	0.0030231
DPY19L2P1	DPY19L2 pseudogene 1	2.988	0.00087625
CYP1B1	cytochrome P450 family 1 subfamily B member 1	2.9858	0.0075508
STEAP3	STEAP3 metalloreductase	2.9832	6.58e-05
GPNMB	glycoprotein nmb	2.9615	0.012179
EVI2A	ecotropic viral integration site 2A	2.937	0.0016025
DMBT1	deleted in malignant brain tumors 1	2.9355	0.0059955
CXCL3	C-X-C motif chemokine ligand 3	2.9352	0.00049045
SERPINE2	serpin family E member 2	2.9247	5.4347e-05
GALNT5	polypeptide N-acetylgalactosaminyltransferase 5	2.8907	0.0048483
LAMA2	laminin subunit alpha 2	2.8762	0.00016017
MOXD1	monooxygenase DBH like 1	2.8631	0.049903
SNAI2	snail family transcriptional repressor 2	2.851	0.00041741
PTPRN2	protein tyrosine phosphatase receptor type N2	2.8473	3.732e-06
VCAN	versican	2.8112	0.0089307
COL24A1	collagen type XXIV alpha 1 chain	2.8086	0.0039441
DNER	delta/notch like EGF repeat containing	2.8079	0.00053957
LIPH	lipase H	2.8069	0.036262
SORCS2	sortilin related VPS10 domain containing receptor 2	2.8044	0.00020015
GEM	GTP binding protein overexpressed in skeletal muscle	2.7947	0.014065
IP6K3	inositol hexakisphosphate kinase 3	2.7928	0.0020587
PTGIR	prostaglandin I2 receptor	2.7925	0.00011161
CHMP4C	charged multivesicular body protein 4C	2.784	0.00039723
CPA4	carboxypeptidase A4	2.7637	0.030064
EPHA5-AS1	EPHA5 antisense RNA 1	2.7564	0.00011161
GATA6	GATA binding protein 6	2.7547	7.9167e-06
COCH	cochlin	2.7412	0.00055484
KRT34	keratin 34	2.74	0.044101
KCNMB4	potassium calcium-activated channel subfamily M regulatory beta subunit 4	2.7324	0.0036003
LAYN	layilin	2.7228	0.0033862
IGDCC4	immunoglobulin superfamily DCC subclass member 4	2.7191	0.0043393
ITGA4	integrin subunit alpha 4	2.7024	0.0024556
SLC16A2	solute carrier family 16 member 2	2.7009	4.0973e-05
SH3PXD2A	SH3 and PX domains 2A	2.6687	0.010412
TRIM36	tripartite motif containing 36	2.6592	5.0352e-06
ARSI	arylsulfatase family member I	2.6529	0.00062566
IL1R1	interleukin 1 receptor type 1	2.6521	0.001324
BMP2	bone morphogenetic protein 2	2.6503	6.9608e-05
PTGFR	prostaglandin F receptor	2.6462	0.014673
FA2H	fatty acid 2-hydroxylase	2.6386	0.00010919
CCND1	cyclin D1	2.636	0.00015733
RERG	RAS like estrogen regulated growth inhibitor	2.6342	0.005019
HMSD	histocompatibility minor serpin domain containing	2.628	2.5364e-05
TWIST1	twist family bHLH transcription factor 1	2.6251	0.013624
BCL2A1	BCL2 related protein A1	2.6215	3.732e-06
PLIN4	perilipin 4	2.6116	0.0015143
C15orf48	chromosome 15 open reading frame 48	2.6066	0.04982
CD40	CD40 molecule	2.5962	0.0010303
IFITM10	interferon induced transmembrane protein 10	2.5961	3.294e-05
SLC40A1	solute carrier family 40 member 1	2.5947	0.0026324
EPHA5	EPH receptor A5	2.5944	0.0038224
FBXO41	F-box protein 41	2.5867	6.6724e-05
FOSL1	"FOS like 1, AP-1 transcription factor subunit"	2.5755	0.00052032
TMEM158	transmembrane protein 158 (gene/pseudogene)	2.5752	0.03059
MAP1A	microtubule associated protein 1A	2.5743	0.010783
ADD3	adducin 3	2.5609	0.0014273
LINC00520	long intergenic non-protein coding RNA 520	2.5557	5.5867e-05
FHOD3	formin homology 2 domain containing 3	2.5506	0.0010061
KLHL30	kelch like family member 30	2.5467	7.4269e-05
SLC16A14	solute carrier family 16 member 14	2.5431	4.0067e-05
LRP1	LDL receptor related protein 1	2.5395	0.0039413
KRTAP1-5	keratin associated protein 1-5	2.5389	1.537e-05
TTC39C	tetratricopeptide repeat domain 39C	2.5054	0.0026534
LPAR1	lysophosphatidic acid receptor 1	2.4995	0.0042089
PRICKLE2	prickle planar cell polarity protein 2	2.4962	0.00019457
SMIM1	small integral membrane protein 1 (Vel blood group)	2.4847	7.6534e-05
KLRC4	killer cell lectin like receptor C4	2.4784	0.0011615
ZP1	zona pellucida glycoprotein 1	2.4747	0.018195
EMP1	epithelial membrane protein 1	2.469	0.00034141
TNFRSF6B	TNF receptor superfamily member 6b	2.4647	0.0039243
S100A3	S100 calcium binding protein A3	2.4609	0.00081476
TMEM26	transmembrane protein 26	2.4575	0.019466
TNFRSF21	TNF receptor superfamily member 21	2.4542	0.00060914
SHC4	SHC adaptor protein 4	2.4537	0.014917
PRKCQ-AS1	PRKCQ antisense RNA 1	2.4453	0.00030744
SOCS1	suppressor of cytokine signaling 1	2.4404	0.0013529
CPA3	carboxypeptidase A3	2.4378	0.014271
CTSO	cathepsin O	2.4349	0.0042615
TRPC3	transient receptor potential cation channel subfamily C member 3	2.4324	3.7487e-06
PRSS35	serine protease 35	2.4287	0.00097914
LAMB3	laminin subunit beta 3	2.4231	1.1957e-05
SPOCD1	SPOC domain containing 1	2.4189	0.0023039
NGEF	neuronal guanine nucleotide exchange factor	2.4165	3.7361e-06
SLC16A6	solute carrier family 16 member 6	2.4149	0.0056388
PPP2R2C	protein phosphatase 2 regulatory subunit Bgamma	2.4147	0.00014293
HSPB8	heat shock protein family B (small) member 8	2.4136	4.9694e-05
TMTC2	transmembrane O-mannosyltransferase targeting cadherins 2	2.4064	0.035181
AKR1C3	aldo-keto reductase family 1 member C3	2.3938	0.001261
LOXL4	lysyl oxidase like 4	2.3892	0.0036081
SERPINB2	serpin family B member 2	2.3837	3.0246e-05
S1PR2	sphingosine-1-phosphate receptor 2	2.3792	0.0029235
TNFSF4	TNF superfamily member 4	2.3752	0.00017249
PPP1R9A	protein phosphatase 1 regulatory subunit 9A	2.374	0.00055242
TRIM63	tripartite motif containing 63	2.3698	6.6376e-05
HSD11B1	hydroxysteroid 11-beta dehydrogenase 1	2.3678	0.014144
GXYLT2	glucoside xylosyltransferase 2	2.3579	0.0026873
PCOLCE	procollagen C-endopeptidase enhancer	2.3525	0.040863
PAG1	phosphoprotein membrane anchor with glycosphingolipid microdomains 1	2.3517	0.020689
PTGER2	prostaglandin E receptor 2	2.3487	0.0022808
PPP4R4	protein phosphatase 4 regulatory subunit 4	2.3445	4.2083e-05
ELOVL4	ELOVL fatty acid elongase 4	2.3417	7.4642e-05
ITGA7	integrin subunit alpha 7	2.3322	0.0028799
SLC18B1	solute carrier family 18 member B1	2.3297	0.0069014
SLC2A14	solute carrier family 2 member 14	2.32	6.4215e-05
SH2D6	SH2 domain containing 6	2.3189	0.015542
FST	follistatin	2.3135	0.0029027
IL22RA1	interleukin 22 receptor subunit alpha 1	2.3126	0.00098101
CD68	CD68 molecule	2.3125	0.00013336
RUNX2	RUNX family transcription factor 2	2.3111	0.0012316
TNFAIP2	TNF alpha induced protein 2	2.3109	0.00034489
NPFFR2	neuropeptide FF receptor 2	2.3092	0.03921
IRS2	insulin receptor substrate 2	2.2877	0.0040526
ELOVL3	ELOVL fatty acid elongase 3	2.2846	0.00071156
SATB1	SATB homeobox 1	2.2781	0.0043572
LINC01116	long intergenic non-protein coding RNA 1116	2.275	0.03264
TRNP1	TMF1 regulated nuclear protein 1	2.272	0.0020842
AFP	alpha fetoprotein	2.268	0.0018646
PAQR5	progestin and adipoQ receptor family member 5	2.2656	0.00035824
ABCC6	ATP binding cassette subfamily C member 6	2.2654	0.00065591
AKR1C1	aldo-keto reductase family 1 member C1	2.2646	0.0027421
HLA-DMA	"major histocompatibility complex, class II, DM alpha"	2.2637	0.00014638
WDR66	WD repeat domain 66	2.2593	0.00014638
PPP1R3G	protein phosphatase 1 regulatory subunit 3G	2.2561	6.7566e-05
PLA2G4A	phospholipase A2 group IVA	2.2476	0.00090388
RGL1	ral guanine nucleotide dissociation stimulator like 1	2.2408	0.0014151
IL4I1	interleukin 4 induced 1	2.2349	0.024875
NPAS2	neuronal PAS domain protein 2	2.2342	0.00031851
EVC	EvC ciliary complex subunit 1	2.232	0.00037515
AGTR1	angiotensin II receptor type 1	2.2299	0.0076977
VEGFC	vascular endothelial growth factor C	2.2268	0.0019651
AGT	angiotensinogen	2.212	0.042424
SSPN	sarcospan	2.2092	0.0051149
DHRS2	dehydrogenase/reductase 2	2.1999	0.013506
RGS2	regulator of G protein signaling 2	2.1985	0.0028617
DPP4	dipeptidyl peptidase 4	2.189	0.018286
SPINK2	serine peptidase inhibitor Kazal type 2	2.1838	0.0016279
CLDN23	claudin 23	2.1815	0.00045986
PID1	phosphotyrosine interaction domain containing 1	2.1806	0.0020587
ASB2	ankyrin repeat and SOCS box containing 2	2.1657	0.0082034
VASN	vasorin	2.1655	0.029245
GRTP1	growth hormone regulated TBC protein 1	2.1638	0.0089476
VWDE	von Willebrand factor D and EGF domains	2.1582	0.00098472
ZMIZ1-AS1	ZMIZ1 antisense RNA 1	2.1548	0.00050209
PRRG4	proline rich and Gla domain 4	2.1508	5.6708e-05
ENOX1	ecto-NOX disulfide-thiol exchanger 1	2.1504	6.0873e-05
FAM89A	family with sequence similarity 89 member A	2.15	0.0020577
LINC01574	long intergenic non-protein coding RNA 1574	2.1428	4.0067e-05
TSPAN12	tetraspanin 12	2.139	0.0019008
STAMBPL1	STAM binding protein like 1	2.1387	0.014153
KCNJ12	potassium inwardly rectifying channel subfamily J member 12	2.1355	0.0027134
PLEKHH2	"pleckstrin homology, MyTH4 and FERM domain containing H2"	2.1282	0.00021563
VPS37D	VPS37D subunit of ESCRT-I	2.1268	0.00031851
HNMT	histamine N-methyltransferase	2.1258	0.00037467
LINC00545	long intergenic non-protein coding RNA 545	2.1206	1.3031e-05
FGF14-AS2	FGF14 antisense RNA 2	2.1179	9.4306e-05
ODF3L1	outer dense fiber of sperm tails 3 like 1	2.111	0.0072039
STC1	stanniocalcin 1	2.1091	0.0099857
FAM13A	family with sequence similarity 13 member A	2.1029	0.00094591
SERPINB7	serpin family B member 7	2.1001	0.00033497
ADAMTS14	ADAM metallopeptidase with thrombospondin type 1 motif 14	2.0955	0.019191
TNFSF9	TNF superfamily member 9	2.095	0.012816
XDH	xanthine dehydrogenase	2.0938	0.00020503
GGT8P	gamma-glutamyltransferase 8 pseudogene	2.0884	0.0013117
PCDH18	protocadherin 18	2.0759	6.4215e-05
BEST1	bestrophin 1	2.0756	0.00021081
FAS	Fas cell surface death receptor	2.0736	0.0053515
LINC00525	long intergenic non-protein coding RNA 525	2.073	0.0056388
MMP11	matrix metallopeptidase 11	2.0545	0.001659
ACSL1	acyl-CoA synthetase long chain family member 1	2.0495	0.0026534
BATF2	basic leucine zipper ATF-like transcription factor 2	2.0451	0.00025093
CHPF	chondroitin polymerizing factor	2.044	0.002963
STK26	serine/threonine kinase 26	2.0376	0.0083629
CYP4F3	cytochrome P450 family 4 subfamily F member 3	2.0329	0.010758
CPNE7	copine 7	2.0319	0.0026555
FAM171B	family with sequence similarity 171 member B	2.0289	0.0012913
LCN15	lipocalin 15	2.0262	0.0001966
SNCA	synuclein alpha	2.024	0.00015242
PREX1	"phosphatidylinositol-3,4,5-trisphosphate dependent Rac exchange factor 1"	2.0179	0.00060775
MMP16	matrix metallopeptidase 16	2.0155	0.0020252
ITPKA	inositol-trisphosphate 3-kinase A	2.0153	0.012397
GALNT3	polypeptide N-acetylgalactosaminyltransferase 3	2.0149	8.5569e-05
TPBG	trophoblast glycoprotein	2.0098	0.00026298
COL13A1	collagen type XIII alpha 1 chain	2.0087	0.016754
HPGD	15-hydroxyprostaglandin dehydrogenase	2.0072	0.0035606
MFGE8	milk fat globule-EGF factor 8 protein	1.995	0.00013336
CPED1	cadherin like and PC-esterase domain containing 1	1.9945	0.00435
P2RY2	purinergic receptor P2Y2	1.9889	0.022257
STAT4	signal transducer and activator of transcription 4	1.9858	0.0049106
CD163L1	CD163 molecule like 1	1.9841	0.00054571
PKP3	plakophilin 3	1.9822	0.0063102
PLCL2	phospholipase C like 2	1.9815	0.00010919
SLC2A3	solute carrier family 2 member 3	1.9786	0.00031851
BEX4	brain expressed X-linked 4	1.9767	0.0013683
EPGN	epithelial mitogen	1.9742	0.00099822
SLC37A2	solute carrier family 37 member 2	1.9683	5.7079e-05
GSAP	gamma-secretase activating protein	1.9676	0.0076513
RNF24	ring finger protein 24	1.9657	1.0038e-05
NPC1	NPC intracellular cholesterol transporter 1	1.9656	0.001553
PFN2	profilin 2	1.9644	0.018033
FOXP2	forkhead box P2	1.9594	1.8459e-05
NAV3	neuron navigator 3	1.9533	0.00085111
P2RY1	purinergic receptor P2Y1	1.9418	0.0002795
HENMT1	HEN methyltransferase 1	1.935	0.0005369
GFI1	growth factor independent 1 transcriptional repressor	1.9347	0.029245
CIITA	class II major histocompatibility complex transactivator	1.9276	0.036914
BMPR1B	bone morphogenetic protein receptor type 1B	1.9226	3.2687e-05
ARHGEF26	Rho guanine nucleotide exchange factor 26	1.9176	7.1441e-05
FRMD5	FERM domain containing 5	1.9176	0.010412
IRS1	insulin receptor substrate 1	1.9158	0.0027826
DGKG	diacylglycerol kinase gamma	1.9157	0.011306
PLEKHA4	pleckstrin homology domain containing A4	1.9116	0.012347
SPATA13	spermatogenesis associated 13	1.9109	0.0015001
PDE4DIP	phosphodiesterase 4D interacting protein	1.9099	0.016576
SSBP2	single stranded DNA binding protein 2	1.9097	0.0046206
PATL2	PAT1 homolog 2	1.9088	0.0098589
PWWP2B	PWWP domain containing 2B	1.9084	0.0055776
RIN1	Ras and Rab interactor 1	1.9042	0.0019337
HTR7	5-hydroxytryptamine receptor 7	1.8957	0.025197
PCDH9	protocadherin 9	1.8937	0.0030262
TMEM71	transmembrane protein 71	1.8922	0.0049406
RUNX1T1	RUNX1 partner transcriptional co-repressor 1	1.8905	0.0041551
RNF112	ring finger protein 112	1.8891	0.0030817
CCDC169	coiled-coil domain containing 169	1.8884	0.00014605
WIPF1	WAS/WASL interacting protein family member 1	1.8813	0.0001038
GSDMC	gasdermin C	1.8782	0.00038253
ZDHHC11	zinc finger DHHC-type containing 11	1.8782	0.00092419
ZC3H12A	zinc finger CCCH-type containing 12A	1.8763	0.0036221
RSPO3	R-spondin 3	1.8694	0.00030121
SOHLH2	spermatogenesis and oogenesis specific basic helix-loop-helix 2	1.868	9.2077e-05
TNFRSF11B	TNF receptor superfamily member 11b	1.8642	0.00091165
EXPH5	exophilin 5	1.8633	3.5754e-05
DUSP10	dual specificity phosphatase 10	1.8626	5.6708e-05
CA13	carbonic anhydrase 13	1.8615	0.019191
CXCL8	C-X-C motif chemokine ligand 8	1.8612	0.048001
CSF1R	colony stimulating factor 1 receptor	1.8599	0.0056753
XK	X-linked Kx blood group	1.8565	0.0049187
CRISPLD2	cysteine rich secretory protein LCCL domain containing 2	1.8556	0.039066
SLC22A3	solute carrier family 22 member 3	1.8553	5.8481e-05
PAK1	p21 (RAC1) activated kinase 1	1.8546	0.00080816
KIAA0513	KIAA0513	1.8534	5.1793e-05
SCN1A	sodium voltage-gated channel alpha subunit 1	1.8502	0.00017046
COL11A1	collagen type XI alpha 1 chain	1.8487	0.010645
TNFSF13B	TNF superfamily member 13b	1.8454	0.00055013
ARHGEF6	Rac/Cdc42 guanine nucleotide exchange factor 6	1.8363	0.0033596
CIART	circadian associated repressor of transcription	1.8309	0.00020503
JAZF1	JAZF zinc finger 1	1.8295	0.0059926
NRIP3	nuclear receptor interacting protein 3	1.8293	0.00018422
PARP8	poly(ADP-ribose) polymerase family member 8	1.8243	0.003184
ALOX15B	arachidonate 15-lipoxygenase type B	1.8211	2.9757e-05
SMIM3	small integral membrane protein 3	1.8189	0.0019531
SALL4	spalt like transcription factor 4	1.8129	0.03297
SLC16A7	solute carrier family 16 member 7	1.8113	0.0037651
LRAT	lecithin retinol acyltransferase	1.8097	0.00091304
LCP1	lymphocyte cytosolic protein 1	1.8075	0.00055432
ANGPT1	angiopoietin 1	1.8036	0.035181
UGT2B15	UDP glucuronosyltransferase family 2 member B15	1.8023	0.00015515
HSPA12A	heat shock protein family A (Hsp70) member 12A	1.8012	0.0031139
AVPI1	arginine vasopressin induced 1	1.7997	0.0001601
TSPAN10	tetraspanin 10	1.7991	6.6724e-05
SMPDL3A	sphingomyelin phosphodiesterase acid like 3A	1.7972	0.0090164
RORA	RAR related orphan receptor A	1.794	0.0029946
MANBA	mannosidase beta	1.7922	0.0024258
ALDOC	"aldolase, fructose-bisphosphate C"	1.7878	6.9608e-05
UBQLNL	ubiquilin like	1.7878	0.0043165
CABYR	calcium binding tyrosine phosphorylation regulated	1.7862	0.01403
PLCB4	phospholipase C beta 4	1.7855	0.004463
TTLL7	tubulin tyrosine ligase like 7	1.7817	0.0023021
CTSL	cathepsin L	1.7814	0.00077992
CCL26	C-C motif chemokine ligand 26	1.7811	2.5364e-05
FAP	fibroblast activation protein alpha	1.7811	0.026484
TRIB2	tribbles pseudokinase 2	1.7776	0.00079236
CTH	cystathionine gamma-lyase	1.7766	0.0082034
HSPA2	heat shock protein family A (Hsp70) member 2	1.7756	0.00039994
CEBPB	CCAAT enhancer binding protein beta	1.7751	0.00020136
BMPER	BMP binding endothelial regulator	1.773	0.001726
LURAP1L	leucine rich adaptor protein 1 like	1.7713	0.0002304
SYT1	synaptotagmin 1	1.7698	0.00048698
CATSPER1	cation channel sperm associated 1	1.7671	5.8481e-05
RCAN3	RCAN family member 3	1.7614	0.00050906
C2orf78	chromosome 2 open reading frame 78	1.7577	0.026862
ZNF385B	zinc finger protein 385B	1.7557	0.0016987
TMEM117	transmembrane protein 117	1.7541	0.011405
OSBPL6	oxysterol binding protein like 6	1.7498	0.00015652
CYTIP	cytohesin 1 interacting protein	1.7465	0.00083119
ASAP3	"ArfGAP with SH3 domain, ankyrin repeat and PH domain 3"	1.7431	6.7566e-05
GRIN3B	glutamate ionotropic receptor NMDA type subunit 3B	1.7405	0.0010618
FTHL17	ferritin heavy chain like 17	1.7404	0.0012765
ELOVL6	ELOVL fatty acid elongase 6	1.7398	0.0010175
CHST2	carbohydrate sulfotransferase 2	1.7393	0.00029917
STRIP2	striatin interacting protein 2	1.7376	0.0005602
ECM1	extracellular matrix protein 1	1.7342	0.0035228
MID1IP1	MID1 interacting protein 1	1.7299	0.0012906
HIVEP3	HIVEP zinc finger 3	1.7277	0.00049045
KLRC1	killer cell lectin like receptor C1	1.7213	0.0011004
PYGO1	pygopus family PHD finger 1	1.7207	0.04829
TMEM171	transmembrane protein 171	1.7194	0.035964
BAIAP3	BAI1 associated protein 3	1.7176	0.0045343
TMEM159	transmembrane protein 159	1.7174	0.00051246
HDAC9	histone deacetylase 9	1.7161	0.0014995
SLC44A3	solute carrier family 44 member 3	1.7154	0.00046055
EVI2B	ecotropic viral integration site 2B	1.7094	0.00013748
LIFR	LIF receptor subunit alpha	1.709	0.00088143
ETS2	"ETS proto-oncogene 2, transcription factor"	1.7074	4.2684e-05
PLAC1	placenta enriched 1	1.7066	5.6708e-05
MYO15A	myosin XVA	1.7041	0.0012913
WNT11	Wnt family member 11	1.7021	0.00072367
LRRC63	leucine rich repeat containing 63	1.7007	0.00043536
AZIN2	antizyme inhibitor 2	1.7006	0.00049635
RAB27B	"RAB27B, member RAS oncogene family"	1.6996	0.026862
RAB31	"RAB31, member RAS oncogene family"	1.6925	0.00010588
RELB	"RELB proto-oncogene, NF-kB subunit"	1.6917	0.018286
CTSH	cathepsin H	1.689	0.0054716
AKR1B10	aldo-keto reductase family 1 member B10	1.6872	0.0015853
GDF5	growth differentiation factor 5	1.6866	0.013088
SAMD12	sterile alpha motif domain containing 12	1.6842	0.001447
ATP1A2	ATPase Na+/K+ transporting subunit alpha 2	1.677	0.00070382
CCDC88B	coiled-coil domain containing 88B	1.6751	9.9214e-05
SPTLC3	serine palmitoyltransferase long chain base subunit 3	1.6736	0.0023776
NFIL3	"nuclear factor, interleukin 3 regulated"	1.6726	0.00092723
ARHGEF4	Rho guanine nucleotide exchange factor 4	1.6684	0.00013132
GKN1	gastrokine 1	1.6677	0.0069127
EHF	ETS homologous factor	1.6651	0.024029
VNN3	vanin 3	1.6643	0.027308
ANKEF1	ankyrin repeat and EF-hand domain containing 1	1.6539	0.00052032
GCNT1	glucosaminyl (N-acetyl) transferase 1	1.6519	0.00019955
GPR39	G protein-coupled receptor 39	1.6505	0.0051681
MAFB	MAF bZIP transcription factor B	1.6503	0.0087666
AQP11	aquaporin 11	1.6431	0.0010373
MRVI1	murine retrovirus integration site 1 homolog	1.6406	0.0001271
CYP4F2	cytochrome P450 family 4 subfamily F member 2	1.64	0.0055553
FNDC4	fibronectin type III domain containing 4	1.6392	0.00088464
TTC25	tetratricopeptide repeat domain 25	1.6373	0.00068402
IRAK3	interleukin 1 receptor associated kinase 3	1.6337	0.016597
FRK	fyn related Src family tyrosine kinase	1.6336	0.00035394
MYO7A	myosin VIIA	1.6329	0.0087376
ARL4C	ADP ribosylation factor like GTPase 4C	1.6286	0.00014638
ARHGAP24	Rho GTPase activating protein 24	1.6235	4.0067e-05
EVC2	EvC ciliary complex subunit 2	1.6235	0.0022386
TNNT1	"troponin T1, slow skeletal type"	1.6194	0.019059
KCNJ14	potassium inwardly rectifying channel subfamily J member 14	1.6183	0.00022046
TLR2	toll like receptor 2	1.6129	0.002637
CD44	CD44 molecule (Indian blood group)	1.6125	0.00065954
AP5B1	adaptor related protein complex 5 subunit beta 1	1.6123	0.00016332
PIK3CG	"phosphatidylinositol-4,5-bisphosphate 3-kinase catalytic subunit gamma"	1.6118	0.006592
RAB6B	"RAB6B, member RAS oncogene family"	1.6092	0.00095847
LYG1	lysozyme g1	1.6071	0.00015195
ANGPTL2	angiopoietin like 2	1.607	0.001553
RNASEL	ribonuclease L	1.6054	0.00058673
HSD3B7	"hydroxy-delta-5-steroid dehydrogenase, 3 beta- and steroid delta-isomerase 7"	1.6052	0.0017484
ATP8B3	ATPase phospholipid transporting 8B3	1.6016	0.029362
C2orf27A	chromosome 2 open reading frame 27A	1.5989	0.0088601
TRIM2	tripartite motif containing 2	1.5965	0.014482
SVEP1	"sushi, von Willebrand factor type A, EGF and pentraxin domain containing 1"	1.5947	0.03485
LINC01252	long intergenic non-protein coding RNA 1252	1.5934	0.0002421
DACT3	dishevelled binding antagonist of beta catenin 3	1.5924	0.047213
MEST	mesoderm specific transcript	1.5916	8.1633e-05
TFPI2	tissue factor pathway inhibitor 2	1.5886	0.021763
C11orf24	chromosome 11 open reading frame 24	1.5827	7.5397e-05
POM121L9P	"POM121 transmembrane nucleoporin like 9, pseudogene"	1.5815	0.00014023
ADAMTSL4	ADAMTS like 4	1.5805	0.0092021
SLC6A9	solute carrier family 6 member 9	1.5799	0.0038616
FTCDNL1	formiminotransferase cyclodeaminase N-terminal like	1.5735	0.0023021
EIF5A2	eukaryotic translation initiation factor 5A2	1.572	0.0021551
CTSS	cathepsin S	1.5708	0.0086315
MT1E	metallothionein 1E	1.5705	0.00046392
SYCP2	synaptonemal complex protein 2	1.5699	0.0031958
SH2D4A	SH2 domain containing 4A	1.5686	0.0043273
ELF3	E74 like ETS transcription factor 3	1.5651	0.0016257
GDNF	glial cell derived neurotrophic factor	1.5607	0.0011224
CC2D2A	coiled-coil and C2 domain containing 2A	1.5581	0.0015757
EBI3	Epstein-Barr virus induced 3	1.5524	0.015012
TMEM200A	transmembrane protein 200A	1.5503	0.0056174
LOC100131289	uncharacterized LOC100131289	1.548	0.0001869
PTPRU	protein tyrosine phosphatase receptor type U	1.5466	0.0037864
THEMIS2	thymocyte selection associated family member 2	1.5452	0.001139
GBP5	guanylate binding protein 5	1.5413	0.01238
RAG1	recombination activating 1	1.5412	0.0031676
SLC22A18	solute carrier family 22 member 18	1.5368	0.00012192
SPAG16	sperm associated antigen 16	1.536	0.0001869
WFDC21P	"WAP four-disulfide core domain 21, pseudogene"	1.5358	0.041208
CDS1	CDP-diacylglycerol synthase 1	1.5357	0.00011883
ARL4A	ADP ribosylation factor like GTPase 4A	1.5326	0.001324
CORO2B	coronin 2B	1.5322	0.00098949
SGCE	sarcoglycan epsilon	1.5292	0.0029603
GLI1	GLI family zinc finger 1	1.5289	0.038886
CYP27C1	cytochrome P450 family 27 subfamily C member 1	1.5273	0.0070507
TMEM38B	transmembrane protein 38B	1.5262	0.0010061
HSD3B1	"hydroxy-delta-5-steroid dehydrogenase, 3 beta- and steroid delta-isomerase 1"	1.5254	0.00015652
CXCL10	C-X-C motif chemokine ligand 10	1.5249	0.0018647
FAM90A1	family with sequence similarity 90 member A1	1.5245	0.005549
MYO1F	myosin IF	1.5207	0.040843
LINC00240	long intergenic non-protein coding RNA 240	1.5183	0.0049898
CACNB2	calcium voltage-gated channel auxiliary subunit beta 2	1.5158	0.0018066
HOPX	HOP homeobox	1.5147	0.0045272
EGFR	epidermal growth factor receptor	1.5134	0.00043009
LOX	lysyl oxidase	1.5106	0.031811
PXYLP1	2-phosphoxylose phosphatase 1	1.5066	0.00090907
CFB	complement factor B	1.5057	0.016304
HES7	hes family bHLH transcription factor 7	1.5039	0.040586
LAMC2	laminin subunit gamma 2	1.5037	0.00069873
HK2	hexokinase 2	1.5034	0.00062914
ABCC6P1	ATP binding cassette subfamily C member 6 pseudogene 1	1.5016	0.011722
SMPD1	sphingomyelin phosphodiesterase 1	1.5013	6.7404e-05
PTPN22	protein tyrosine phosphatase non-receptor type 22	1.501	0.013156
TNFRSF9	TNF receptor superfamily member 9	1.4962	0.01955
LRRK2	leucine rich repeat kinase 2	1.4948	0.014301
ALDH3B1	aldehyde dehydrogenase 3 family member B1	1.4932	0.019245
HTRA1	HtrA serine peptidase 1	1.4931	0.0016678
GPCPD1	glycerophosphocholine phosphodiesterase 1	1.4924	6.0052e-05
CLCF1	cardiotrophin like cytokine factor 1	1.4918	5.1889e-05
LMTK3	lemur tyrosine kinase 3	1.4878	0.005202
METRNL	"meteorin like, glial cell differentiation regulator"	1.4861	0.00035763
UGT2B7	UDP glucuronosyltransferase family 2 member B7	1.4814	0.00060775
FAM167A	family with sequence similarity 167 member A	1.4779	0.019911
RAB36	"RAB36, member RAS oncogene family"	1.4771	0.013316
ST8SIA1	"ST8 alpha-N-acetyl-neuraminide alpha-2,8-sialyltransferase 1"	1.4755	0.047293
STK33	serine/threonine kinase 33	1.4733	0.0077903
RBM47	RNA binding motif protein 47	1.4727	0.0036949
PSTPIP2	proline-serine-threonine phosphatase interacting protein 2	1.4686	0.019198
TDRD6	tudor domain containing 6	1.4667	0.0058528
ABCA1	ATP binding cassette subfamily A member 1	1.4643	0.0034887
ABCA6	ATP binding cassette subfamily A member 6	1.4634	0.00055484
CCDC136	coiled-coil domain containing 136	1.4602	0.0013003
DHRS7	dehydrogenase/reductase 7	1.4593	6.7566e-05
GGTLC1	gamma-glutamyltransferase light chain 1	1.4558	0.002577
ITPKC	inositol-trisphosphate 3-kinase C	1.4547	0.00073747
VIT	vitrin	1.4531	0.0040883
LINC00473	long intergenic non-protein coding RNA 473	1.4504	0.0057883
DBP	D-box binding PAR bZIP transcription factor	1.4497	0.0013389
TMEM198	transmembrane protein 198	1.4489	0.016199
WDR17	WD repeat domain 17	1.4462	7.2297e-05
SOD2	superoxide dismutase 2	1.4451	0.020828
IFI30	IFI30 lysosomal thiol reductase	1.4409	0.017944
HECW2	"HECT, C2 and WW domain containing E3 ubiquitin protein ligase 2"	1.4404	0.01292
LRMP	lymphoid restricted membrane protein	1.4392	0.00041985
ANKS6	ankyrin repeat and sterile alpha motif domain containing 6	1.4373	6.6765e-05
FAM102B	family with sequence similarity 102 member B	1.4373	0.00058618
CLIP2	CAP-Gly domain containing linker protein 2	1.4363	0.00021882
CORO6	coronin 6	1.4337	0.0084279
DNAH14	dynein axonemal heavy chain 14	1.4316	7.0936e-05
EHD3	EH domain containing 3	1.4316	0.0005845
GABBR2	gamma-aminobutyric acid type B receptor subunit 2	1.4315	0.0048754
CCDC85B	coiled-coil domain containing 85B	1.4288	0.00010919
SMIM10	small integral membrane protein 10	1.4266	0.013309
LRRC8B	leucine rich repeat containing 8 VRAC subunit B	1.4248	0.00024606
LCE1B	late cornified envelope 1B	1.4236	0.0062198
SERP2	stress associated endoplasmic reticulum protein family member 2	1.4225	0.00047037
DAW1	dynein assembly factor with WD repeats 1	1.4197	0.011434
LSP1	lymphocyte specific protein 1	1.4189	0.0012726
SDC4	syndecan 4	1.4188	0.030448
DPY19L2	dpy-19 like 2	1.4169	0.0035821
FZD2	frizzled class receptor 2	1.4155	0.023506
TNFAIP3	TNF alpha induced protein 3	1.4152	0.006617
STAT2	signal transducer and activator of transcription 2	1.4141	0.00055432
MAMLD1	mastermind like domain containing 1	1.4133	9.9214e-05
SPECC1	sperm antigen with calponin homology and coiled-coil domains 1	1.4096	0.0055776
MLF1	myeloid leukemia factor 1	1.4075	0.019059
EEPD1	endonuclease/exonuclease/phosphatase family domain containing 1	1.4056	0.029362
SPINK13	serine peptidase inhibitor Kazal type 13	1.4054	0.0043572
EFNB2	ephrin B2	1.4053	0.0051015
RHCE	Rh blood group CcEe antigens	1.4049	0.00014595
RASSF4	Ras association domain family member 4	1.4036	0.00013678
PLTP	phospholipid transfer protein	1.4031	0.003642
HPCAL1	hippocalcin like 1	1.4015	0.0026224
MLXIPL	MLX interacting protein like	1.4011	0.00041561
PTPRH	protein tyrosine phosphatase receptor type H	1.4001	0.0035929
ST8SIA4	"ST8 alpha-N-acetyl-neuraminide alpha-2,8-sialyltransferase 4"	1.399	0.00038707
C10orf105	chromosome 10 open reading frame 105	1.3985	0.0025517
PLXNB3	plexin B3	1.398	0.0004699
SPANXC	SPANX family member C	1.3974	0.010294
MYPN	myopalladin	1.3944	0.0022003
MAPK10	mitogen-activated protein kinase 10	1.3942	6.9333e-05
CRYL1	crystallin lambda 1	1.3935	0.0058627
NRP2	neuropilin 2	1.3927	0.024494
KITLG	KIT ligand	1.3906	0.033753
SPATA17	spermatogenesis associated 17	1.3901	8.5288e-05
CNKSR1	connector enhancer of kinase suppressor of Ras 1	1.3878	0.0023644
MAN2B2	mannosidase alpha class 2B member 2	1.3877	0.00020475
KRTAP2-3	keratin associated protein 2-3	1.3868	0.00055484
PTGS2	prostaglandin-endoperoxide synthase 2	1.3846	0.025413
CREB5	cAMP responsive element binding protein 5	1.3834	0.00014638
PPP1R32	protein phosphatase 1 regulatory subunit 32	1.3801	0.00015652
CRYM	crystallin mu	1.3795	0.00027048
RNF125	ring finger protein 125	1.3791	0.00054378
THBS4	thrombospondin 4	1.3784	0.042924
SLC7A8	solute carrier family 7 member 8	1.3764	0.00089822
IFIT1	interferon induced protein with tetratricopeptide repeats 1	1.3762	0.0031599
CXCL1	C-X-C motif chemokine ligand 1	1.3746	0.049946
PHLDA1	pleckstrin homology like domain family A member 1	1.3713	0.027183
CTSV	cathepsin V	1.3666	0.021075
MEIS3	Meis homeobox 3	1.365	0.0024943
PHC2	polyhomeotic homolog 2	1.3648	0.00031606
CDC14B	cell division cycle 14B	1.3605	0.024217
OSBPL1A	oxysterol binding protein like 1A	1.3597	0.035263
RENBP	renin binding protein	1.3557	0.0028487
BVES-AS1	BVES antisense RNA 1	1.3552	0.011072
SOBP	sine oculis binding protein homolog	1.3533	0.013344
ATP2B1	ATPase plasma membrane Ca2+ transporting 1	1.3531	0.0024708
CFAP45	cilia and flagella associated protein 45	1.3527	0.001549
PTGDS	prostaglandin D2 synthase	1.3516	0.022343
TMOD2	tropomodulin 2	1.3507	0.0012253
TMCC3	transmembrane and coiled-coil domain family 3	1.3477	0.010648
DDIT3	DNA damage inducible transcript 3	1.3462	0.0058819
ZMYND8	zinc finger MYND-type containing 8	1.3442	0.045239
RBPJ	recombination signal binding protein for immunoglobulin kappa J region	1.3398	0.0010217
METRN	"meteorin, glial cell differentiation regulator"	1.3389	0.0014833
KCND2	potassium voltage-gated channel subfamily D member 2	1.3383	0.00072483
OVOL1	ovo like transcriptional repressor 1	1.3356	0.00055646
MYH7B	myosin heavy chain 7B	1.3355	0.049332
COL16A1	collagen type XVI alpha 1 chain	1.3351	0.00049428
TSGA10	testis specific 10	1.3348	0.0093233
SIPA1	signal-induced proliferation-associated 1	1.3346	0.00038699
CDKL2	cyclin dependent kinase like 2	1.3315	0.0028508
LINC00706	long intergenic non-protein coding RNA 706	1.3288	0.021092
C5AR1	complement C5a receptor 1	1.3281	0.0023021
CDK14	cyclin dependent kinase 14	1.328	0.0029254
CAMK4	calcium/calmodulin dependent protein kinase IV	1.327	0.0014934
HAPLN3	hyaluronan and proteoglycan link protein 3	1.3266	0.0046891
TXNRD3	thioredoxin reductase 3	1.325	0.0020092
HLF	"HLF transcription factor, PAR bZIP family member"	1.3224	0.033197
RNF175	ring finger protein 175	1.3215	0.00038707
CYP1B1-AS1	CYP1B1 antisense RNA 1	1.3199	0.010764
CCDC96	coiled-coil domain containing 96	1.3197	0.020805
LOC100270746	uncharacterized LOC100270746	1.3188	0.0374
COL1A1	collagen type I alpha 1 chain	1.3155	0.0015447
ACVR2A	activin A receptor type 2A	1.313	0.00041405
IRGM	immunity related GTPase M	1.3123	0.017192
C15orf65	chromosome 15 open reading frame 65	1.311	0.00021081
LOC101929470	uncharacterized LOC101929470	1.3101	0.0031958
HMX2	H6 family homeobox 2	1.3095	0.0026906
HMGA2	high mobility group AT-hook 2	1.3089	0.00049635
MEI1	meiotic double-stranded break formation protein 1	1.3071	0.00061286
DLG3	discs large MAGUK scaffold protein 3	1.3063	0.0008524
TLR6	toll like receptor 6	1.3048	0.0081196
GNAZ	G protein subunit alpha z	1.3045	5.8481e-05
C1orf226	chromosome 1 open reading frame 226	1.3033	0.0026873
TMEM138	transmembrane protein 138	1.302	0.00026298
CHN1	chimerin 1	1.3019	0.012813
FABP5	fatty acid binding protein 5	1.3017	0.012378
MMP23B	matrix metallopeptidase 23B	1.3007	0.028146
QDPR	quinoid dihydropteridine reductase	1.3004	0.00011883
LACC1	laccase domain containing 1	1.2997	0.0067941
IFIT3	interferon induced protein with tetratricopeptide repeats 3	1.2994	0.0060296
TSHZ3	teashirt zinc finger homeobox 3	1.2959	0.00053951
LARP6	"La ribonucleoprotein 6, translational regulator"	1.2958	0.013549
CYP2R1	cytochrome P450 family 2 subfamily R member 1	1.2911	0.00023774
BVES	blood vessel epicardial substance	1.2891	0.024183
KDELR3	KDEL endoplasmic reticulum protein retention receptor 3	1.287	0.0024258
SCIN	scinderin	1.2852	0.0076513
DYRK2	dual specificity tyrosine phosphorylation regulated kinase 2	1.285	0.0095152
CXCL11	C-X-C motif chemokine ligand 11	1.2829	0.002593
C10orf55	chromosome 10 open reading frame 55 (putative)	1.2822	0.0015598
LRG1	leucine rich alpha-2-glycoprotein 1	1.2811	0.0017205
RAVER2	"ribonucleoprotein, PTB binding 2"	1.2797	0.011427
PER3	period circadian regulator 3	1.2777	0.00014638
GEMIN8P4	gem nuclear organelle associated protein 8 pseudogene 4	1.2773	0.00019314
STARD5	StAR related lipid transfer domain containing 5	1.2767	0.015808
RAB3A	"RAB3A, member RAS oncogene family"	1.2751	0.0020483
LOC100996724	phosphodiesterase 4D interacting protein-like	1.2726	0.032114
RAET1E	retinoic acid early transcript 1E	1.2721	0.00075156
SLC27A2	solute carrier family 27 member 2	1.27	0.025929
LRRC56	leucine rich repeat containing 56	1.2684	0.010783
STX17-AS1	STX17 antisense RNA 1	1.2683	0.0046206
TSPAN19	tetraspanin 19	1.2673	0.0042417
SDC1	syndecan 1	1.2663	0.026626
STARD10	StAR related lipid transfer domain containing 10	1.264	0.0062295
DSE	dermatan sulfate epimerase	1.2627	0.01551
GAL3ST1	galactose-3-O-sulfotransferase 1	1.2601	0.044414
SECTM1	secreted and transmembrane 1	1.2559	0.011295
COL9A2	collagen type IX alpha 2 chain	1.2533	0.00058673
KAZALD1	Kazal type serine peptidase inhibitor domain 1	1.2533	0.00499
DIRAS3	DIRAS family GTPase 3	1.2519	0.01962
STON1-GTF2A1L	STON1-GTF2A1L readthrough	1.2482	0.0004699
TNIK	TRAF2 and NCK interacting kinase	1.2474	0.00039526
NUP62CL	nucleoporin 62 C-terminal like	1.245	0.0040323
GLT8D2	glycosyltransferase 8 domain containing 2	1.2428	0.0051365
KLK1	kallikrein 1	1.2384	0.034479
CD82	CD82 molecule	1.2373	0.003033
SKAP2	src kinase associated phosphoprotein 2	1.2356	0.00047037
VSTM2L	V-set and transmembrane domain containing 2 like	1.2336	0.0014236
PLA2R1	phospholipase A2 receptor 1	1.2332	0.027848
SLC31A2	solute carrier family 31 member 2	1.232	0.00053268
DMXL2	Dmx like 2	1.2299	0.0014542
SOX5	SRY-box transcription factor 5	1.2277	0.003979
SNAI3	snail family transcriptional repressor 3	1.2268	0.00089822
S100A4	S100 calcium binding protein A4	1.2254	0.030725
THRA	thyroid hormone receptor alpha	1.2247	0.00018519
PEX5L	peroxisomal biogenesis factor 5 like	1.2247	0.0047345
PSEN2	presenilin 2	1.2237	0.0039097
RDH5	retinol dehydrogenase 5	1.2232	0.0044484
CHKA	choline kinase alpha	1.2215	0.00061904
TMEM144	transmembrane protein 144	1.22	0.010893
BCL6	BCL6 transcription repressor	1.2188	0.0021597
PELI3	pellino E3 ubiquitin protein ligase family member 3	1.2185	0.012804
HSPB6	heat shock protein family B (small) member 6	1.2177	0.021075
MRPL23-AS1	MRPL23 antisense RNA 1	1.2176	0.01486
PLEKHB1	pleckstrin homology domain containing B1	1.2174	0.016262
CEP19	centrosomal protein 19	1.2164	0.0034023
LOXL1	lysyl oxidase like 1	1.215	0.0046494
GCNT3	"glucosaminyl (N-acetyl) transferase 3, mucin type"	1.2148	0.015078
GGTLC2	gamma-glutamyltransferase light chain 2	1.2136	0.00079209
PTCHD4	patched domain containing 4	1.2114	0.0099161
ERICH2	glutamate rich 2	1.21	0.017241
EHBP1	EH domain binding protein 1	1.208	0.02929
ARHGEF17	Rho guanine nucleotide exchange factor 17	1.2063	0.0022625
NKX6-3	NK6 homeobox 3	1.2036	0.014624
ACVR1C	activin A receptor type 1C	1.2027	0.0042019
FKBP7	FKBP prolyl isomerase 7	1.2013	0.0036068
GLYATL1	glycine-N-acyltransferase like 1	1.1976	0.039233
TNNC2	"troponin C2, fast skeletal type"	1.1948	0.00062566
PDE5A	phosphodiesterase 5A	1.1936	0.0027967
TUBA4A	tubulin alpha 4a	1.1931	0.0017246
LOC440040	glutamate metabotropic receptor 5 pseudogene	1.1923	0.029163
GBP2	guanylate binding protein 2	1.192	0.00032162
ZNF608	zinc finger protein 608	1.1893	0.046789
CCL3	C-C motif chemokine ligand 3	1.1867	0.0007602
GLCCI1	glucocorticoid induced 1	1.1867	0.016995
GREB1L	GREB1 like retinoic acid receptor coactivator	1.1861	0.0031037
SH2D2A	SH2 domain containing 2A	1.1847	0.030398
ZEB2	zinc finger E-box binding homeobox 2	1.1846	0.0081817
ZNF404	zinc finger protein 404	1.1825	0.0023838
ME1	malic enzyme 1	1.1823	0.0020033
ALB	albumin	1.1823	0.0037408
LRP1B	LDL receptor related protein 1B	1.1811	0.0032069
FBXO39	F-box protein 39	1.1805	0.0036081
AIM2	absent in melanoma 2	1.1799	0.0070079
SMIM20	small integral membrane protein 20	1.1797	0.00015733
RNLS	"renalase, FAD dependent amine oxidase"	1.1788	0.034037
AKR1B15	aldo-keto reductase family 1 member B15	1.1779	0.0064714
FAM102A	family with sequence similarity 102 member A	1.1735	0.018486
TCF21	transcription factor 21	1.1705	0.0088223
RIMBP3	RIMS binding protein 3	1.1688	0.0012132
TMEM129	transmembrane protein 129	1.1679	0.00020475
HMCN1	hemicentin 1	1.167	0.016458
BIN1	bridging integrator 1	1.1661	0.00080816
LOC729970	hCG2028352-like	1.1659	0.0020486
RAD9A	RAD9 checkpoint clamp component A	1.1658	0.00030734
STAT1	signal transducer and activator of transcription 1	1.1654	0.0012913
ABAT	4-aminobutyrate aminotransferase	1.1652	0.0063749
TNKS1BP1	tankyrase 1 binding protein 1	1.1647	0.00062914
LINC01556	long intergenic non-protein coding RNA 1556	1.1642	0.0020843
CAPN5	calpain 5	1.1639	0.0010303
PITPNC1	phosphatidylinositol transfer protein cytoplasmic 1	1.1629	0.014383
SCN3B	sodium voltage-gated channel beta subunit 3	1.1609	0.00047813
GNGT2	G protein subunit gamma transducin 2	1.1606	0.0023039
IL7	interleukin 7	1.1593	0.0042173
BSCL2	"BSCL2 lipid droplet biogenesis associated, seipin"	1.1582	0.001258
CPEB2	cytoplasmic polyadenylation element binding protein 2	1.1579	0.023356
CLP1	cleavage factor polyribonucleotide kinase subunit 1	1.1577	0.00013449
TMEM54	transmembrane protein 54	1.1571	0.0054418
C2orf81	chromosome 2 open reading frame 81	1.157	0.0023118
KRT86	keratin 86	1.1566	0.0013668
TCIRG1	"T cell immune regulator 1, ATPase H+ transporting V0 subunit a3"	1.1564	0.0024965
CCDC30	coiled-coil domain containing 30	1.1522	0.00072367
LOC399900	uncharacterized LOC399900	1.152	0.0012948
CLIC2	chloride intracellular channel 2	1.1513	0.038904
PPEF1	protein phosphatase with EF-hand domain 1	1.1512	0.025108
MYT1	myelin transcription factor 1	1.1495	0.002963
PSD3	pleckstrin and Sec7 domain containing 3	1.1493	0.038167
DDIAS	DNA damage induced apoptosis suppressor	1.1482	0.0006666
NINJ1	ninjurin 1	1.147	0.0020486
NFKB2	nuclear factor kappa B subunit 2	1.1461	0.022343
LPXN	leupaxin	1.1458	0.00027671
PITPNM1	phosphatidylinositol transfer protein membrane associated 1	1.1419	0.00024606
SNAP25	synaptosome associated protein 25	1.1415	0.0002795
C11orf68	chromosome 11 open reading frame 68	1.1389	0.0021251
AOC3	amine oxidase copper containing 3	1.1373	0.00025633
ADAM22	ADAM metallopeptidase domain 22	1.1345	0.0031529
TLR1	toll like receptor 1	1.1341	0.00046919
ZNF503	zinc finger protein 503	1.1327	0.00031851
TBC1D8B	TBC1 domain family member 8B	1.1323	0.00058673
HCP5	HLA complex P5	1.1323	0.0060842
ZMAT1	zinc finger matrin-type 1	1.1321	0.0060665
FAM90A7P	"family with sequence similarity 90 member A7, pseudogene"	1.1315	0.011435
COL18A1-AS1	COL18A1 antisense RNA 1	1.1293	0.0043289
GRIN2D	glutamate ionotropic receptor NMDA type subunit 2D	1.128	0.00069667
GPHN	gephyrin	1.1265	0.0058819
SPARCL1	SPARC like 1	1.1264	0.0017219
PAAF1	proteasomal ATPase associated factor 1	1.1248	0.00087625
CARD9	caspase recruitment domain family member 9	1.1247	0.011774
DENND2C	DENN domain containing 2C	1.1231	0.0034472
TM7SF2	transmembrane 7 superfamily member 2	1.1228	0.0022843
TEF	"TEF transcription factor, PAR bZIP family member"	1.1226	0.00062776
NUDT22	nudix hydrolase 22	1.1223	0.00078647
CCS	copper chaperone for superoxide dismutase	1.1216	0.00030884
ZNHIT2	zinc finger HIT-type containing 2	1.1207	0.00038795
BLVRB	biliverdin reductase B	1.1201	0.00037995
RBFOX3	RNA binding fox-1 homolog 3	1.1195	0.035856
FAH	fumarylacetoacetate hydrolase	1.1192	0.013237
STXBP5-AS1	STXBP5 antisense RNA 1	1.1189	0.0084027
LINC01546	long intergenic non-protein coding RNA 1546	1.1185	0.0072509
HAGHL	hydroxyacylglutathione hydrolase like	1.1176	0.00753
TTC30A	tetratricopeptide repeat domain 30A	1.1175	0.026017
AQP7P3	aquaporin 7 pseudogene 3	1.116	0.0019227
ITGA3	integrin subunit alpha 3	1.1136	0.011313
DYRK3	dual specificity tyrosine phosphorylation regulated kinase 3	1.112	0.00099822
SOCS3	suppressor of cytokine signaling 3	1.1119	0.0031676
CAPS2	calcyphosine 2	1.1119	0.019475
JAM2	junctional adhesion molecule 2	1.1114	0.04306
KIAA0319	KIAA0319	1.111	0.0051324
ULBP2	UL16 binding protein 2	1.1107	0.00038707
NLGN1	neuroligin 1	1.1102	0.0073773
EHHADH	enoyl-CoA hydratase and 3-hydroxyacyl CoA dehydrogenase	1.11	0.0027126
NRP1	neuropilin 1	1.1094	0.00040979
NRBF2	nuclear receptor binding factor 2	1.1066	0.0010064
PRKAG2	protein kinase AMP-activated non-catalytic subunit gamma 2	1.1061	0.0048166
IFIT1B	interferon induced protein with tetratricopeptide repeats 1B	1.1059	0.00753
NOTCH2	notch receptor 2	1.1057	0.0027936
LRFN1	leucine rich repeat and fibronectin type III domain containing 1	1.1056	0.023001
ACOT13	acyl-CoA thioesterase 13	1.1038	0.0012557
CYSRT1	cysteine rich tail 1	1.1018	0.024735
SH3BGR	SH3 domain binding glutamate rich protein	1.1009	0.0071508
PTPRR	protein tyrosine phosphatase receptor type R	1.1006	0.00093624
GPR19	G protein-coupled receptor 19	1.1005	0.016249
STEAP4	STEAP4 metalloreductase	1.1	0.00067353
LOC101928837	uncharacterized LOC101928837	1.1	0.0057308
TPTE2P6	transmembrane phosphoinositide 3-phosphatase and tensin homolog 2 pseudogene 6	1.0989	0.0024915
MMD	monocyte to macrophage differentiation associated	1.0978	0.00051567
LRRC8E	leucine rich repeat containing 8 VRAC subunit E	1.0954	0.017372
MAST3	microtubule associated serine/threonine kinase 3	1.0932	0.0057491
ATG2A	autophagy related 2A	1.0925	0.0010459
INSIG1	insulin induced gene 1	1.0924	0.044777
SLC15A3	solute carrier family 15 member 3	1.0919	0.0039322
NBEAP1	neurobeachin pseudogene 1	1.0916	0.0077777
MIDN	midnolin	1.0906	0.0024937
BTN3A2	butyrophilin subfamily 3 member A2	1.0894	0.00043721
YIPF2	Yip1 domain family member 2	1.0877	0.0030511
EHBP1L1	EH domain binding protein 1 like 1	1.0854	0.0024242
DHCR7	7-dehydrocholesterol reductase	1.0847	0.0062386
ZNF438	zinc finger protein 438	1.0839	0.0038901
GRIK1-AS1	GRIK1 antisense RNA 1	1.0829	0.02963
B3GNTL1	"UDP-GlcNAc:betaGal beta-1,3-N-acetylglucosaminyltransferase like 1"	1.0823	0.00014605
RNF157	ring finger protein 157	1.0805	0.00042619
SLC4A5	solute carrier family 4 member 5	1.0802	0.014498
SEC1P	"secretory blood group 1, pseudogene"	1.0801	0.010456
ROM1	retinal outer segment membrane protein 1	1.0797	0.00071943
TMEM179B	transmembrane protein 179B	1.0795	0.001166
HIF1A	hypoxia inducible factor 1 subunit alpha	1.079	0.00040979
TGFBR1	transforming growth factor beta receptor 1	1.0779	0.010604
TMTC1	transmembrane O-mannosyltransferase targeting cadherins 1	1.0768	0.0024757
ZDHHC14	zinc finger DHHC-type palmitoyltransferase 14	1.0755	0.0050077
GAA	"glucosidase alpha, acid"	1.0743	0.005236
GSE1	Gse1 coiled-coil protein	1.0741	0.0015979
DRAP1	DR1 associated protein 1	1.0728	0.0011197
ZNF215	zinc finger protein 215	1.071	0.024666
PDLIM4	PDZ and LIM domain 4	1.0689	0.0069464
PTPRZ1	protein tyrosine phosphatase receptor type Z1	1.0689	0.014967
MAPT	microtubule associated protein tau	1.068	0.032376
TSC22D3	TSC22 domain family member 3	1.0676	0.024701
CARS2	"cysteinyl-tRNA synthetase 2, mitochondrial"	1.0672	0.002878
PIK3R2	phosphoinositide-3-kinase regulatory subunit 2	1.0633	0.028534
TTPAL	alpha tocopherol transfer protein like	1.063	0.003489
SRGAP1	SLIT-ROBO Rho GTPase activating protein 1	1.0624	0.0012366
IGF2BP2	insulin like growth factor 2 mRNA binding protein 2	1.0612	0.0010175
NINJ2	ninjurin 2	1.0605	0.00046919
UGT2B11	UDP glucuronosyltransferase family 2 member B11	1.0602	0.0031415
ASPRV1	aspartic peptidase retroviral like 1	1.0602	0.0039322
BDNF-AS	BDNF antisense RNA	1.0586	0.013649
LMLN	leishmanolysin like peptidase	1.0585	0.0030092
LRIF1	ligand dependent nuclear receptor interacting factor 1	1.0569	0.0033897
SLC4A8	solute carrier family 4 member 8	1.0553	0.0028315
MAPRE3	microtubule associated protein RP/EB family member 3	1.0553	0.015566
NID2	nidogen 2	1.0552	0.001261
MAGED4B	MAGE family member D4B	1.0552	0.011722
CYB561	cytochrome b561	1.0545	0.00099822
ZCCHC4	zinc finger CCHC-type containing 4	1.0537	0.0062324
LMO4	LIM domain only 4	1.0527	0.00017249
NFKBIE	NFKB inhibitor epsilon	1.0526	0.0054869
CDH15	cadherin 15	1.0517	0.0019051
HMGA1	high mobility group AT-hook 1	1.0515	0.010568
TMEM140	transmembrane protein 140	1.0513	0.0035522
LEFTY1	left-right determination factor 1	1.0458	0.0099731
ADCY10P1	ADCY10 pseudogene 1	1.0457	0.032036
PRKCQ	protein kinase C theta	1.0453	0.029174
COPG2IT1	COPG2 imprinted transcript 1	1.0444	0.0015714
IGF2BP1	insulin like growth factor 2 mRNA binding protein 1	1.0444	0.012255
CSF1	colony stimulating factor 1	1.0443	0.0028922
TRPT1	tRNA phosphotransferase 1	1.044	0.0020843
BIK	BCL2 interacting killer	1.0431	0.04182
DUSP13	dual specificity phosphatase 13	1.0411	0.0012316
APOL6	apolipoprotein L6	1.0392	0.043461
HEXA	hexosaminidase subunit alpha	1.0382	0.0010291
NFKBIA	NFKB inhibitor alpha	1.0377	0.029682
GPAM	"glycerol-3-phosphate acyltransferase, mitochondrial"	1.0374	0.00034044
OSBPL5	oxysterol binding protein like 5	1.0372	0.0018559
SIMC1	SUMO interacting motifs containing 1	1.0371	0.0077903
TNS3	tensin 3	1.0359	0.010816
C4orf47	chromosome 4 open reading frame 47	1.0355	0.0050711
RASL10B	RAS like family 10 member B	1.0352	0.033167
PPM1K	"protein phosphatase, Mg2+/Mn2+ dependent 1K"	1.0344	0.0071445
TYSND1	trypsin domain containing 1	1.0341	0.0022003
CD55	CD55 molecule (Cromer blood group)	1.0341	0.0082809
TNFSF10	TNF superfamily member 10	1.0311	0.037095
PCSK4	proprotein convertase subtilisin/kexin type 4	1.0307	0.029171
PLAG1	PLAG1 zinc finger	1.029	0.041797
ZBTB38	zinc finger and BTB domain containing 38	1.0282	0.00069287
DNAJB5	DnaJ heat shock protein family (Hsp40) member B5	1.0276	0.013059
FADS1	fatty acid desaturase 1	1.027	0.00058673
ANO9	anoctamin 9	1.0262	0.0024511
TSPEAR-AS2	TSPEAR antisense RNA 2	1.0249	0.0022579
FAM225B	family with sequence similarity 225 member B	1.0238	0.038904
PTPRS	protein tyrosine phosphatase receptor type S	1.0235	0.0012613
PRKG1	protein kinase cGMP-dependent 1	1.0233	0.019749
ARL4D	ADP ribosylation factor like GTPase 4D	1.0211	0.014288
CPA6	carboxypeptidase A6	1.0209	0.0043289
FRRS1	ferric chelate reductase 1	1.0207	0.0081636
TPPP	tubulin polymerization promoting protein	1.02	0.0032262
P4HA2	prolyl 4-hydroxylase subunit alpha 2	1.0153	0.0005155
LYPD3	LY6/PLAUR domain containing 3	1.0151	0.00044385
RND3	Rho family GTPase 3	1.0136	0.00058618
DAGLB	diacylglycerol lipase beta	1.0136	0.0052996
FKBP10	FKBP prolyl isomerase 10	1.0122	0.025162
FN1	fibronectin 1	1.0114	0.010288
LYAR	Ly1 antibody reactive	1.0108	0.0092173
IQCD	IQ motif containing D	1.0096	0.019935
MMAB	metabolism of cobalamin associated B	1.0083	0.00085654
STK36	serine/threonine kinase 36	1.0073	0.0031998
PHLDA2	pleckstrin homology like domain family A member 2	1.0069	0.0038648
SYVN1	synoviolin 1	1.0035	0.0020102
POLA2	"DNA polymerase alpha 2, accessory subunit"	1.0035	0.0033267
SIX4	SIX homeobox 4	1.0035	0.015148
FCHO1	FCH and mu domain containing endocytic adaptor 1	1.0022	0.025632
DPY19L2P2	DPY19L2 pseudogene 2	1.0019	0.0042936
SFR1	SWI5 dependent homologous recombination repair protein 1	1.0004	0.014894
RAB30	"RAB30, member RAS oncogene family"	1	0.0075302
