# Supplementary material for: RNF213 Loss-of-Function Promotes Angiogenesis of Cerebral Microvascular Endothelial Cells in a Cellular State Dependent Manner
Source: Cells. 2022 Dec 24;12(1):78. doi: 10.3390/cells12010078 (PMC9818782; doi:10.3390/cells12010078)
Supplement: Supplementary file 1 [file cells-12-00078-s001.zip › Table S4.xlsx]

## Sheet: Feuil1
Table S4: Most significantly down-regulated genes in confluent RNF213-deficient hCMEC/D3
Symbols	Name	Log (Fold Change)	Ajusted p-value
MGP	matrix Gla protein	-8.4471	1.2008e-05
MPZL2	myelin protein zero like 2	-7.7321	1.0187e-07
FGD5	"FYVE, RhoGEF and PH domain containing 5"	-7.5776	5.0352e-06
ACVRL1	activin A receptor like type 1	-7.4585	1.3166e-05
CYP4X1	cytochrome P450 family 4 subfamily X member 1	-6.9316	1.5037e-07
EDN1	endothelin 1	-6.4817	0.0008524
FAM43A	family with sequence similarity 43 member A	-6.3215	6.8978e-07
STAB1	stabilin 1	-6.06	1.805e-05
BMP6	bone morphogenetic protein 6	-5.9285	0.0014273
ITM2A	integral membrane protein 2A	-5.8931	0.044408
C2CD4B	C2 calcium dependent domain containing 4B	-5.6601	0.00028631
MDFI	MyoD family inhibitor	-5.6266	5.2264e-06
SHANK3	SH3 and multiple ankyrin repeat domains 3	-5.6126	6.0922e-05
NSG1	neuronal vesicle trafficking associated 1	-5.5553	0.00041861
SHE	Src homology 2 domain containing E	-5.489	7.9167e-06
PALM	paralemmin	-5.4605	1.1179e-05
TAL1	"TAL bHLH transcription factor 1, erythroid differentiation factor"	-5.3902	3.0671e-06
EMCN	endomucin	-5.3367	0.00021434
MMRN1	multimerin 1	-5.0468	3.732e-06
GATA2	GATA binding protein 2	-4.9732	1.0274e-05
PNMA2	PNMA family member 2	-4.9271	0.00085248
RASIP1	Ras interacting protein 1	-4.9017	1.537e-05
TAGLN	transgelin	-4.8423	0.0013936
IGFBP2	insulin like growth factor binding protein 2	-4.8357	0.0098242
FZD4	frizzled class receptor 4	-4.6386	0.00058618
MYCT1	MYC target 1	-4.6257	0.00015733
NPDC1	"neural proliferation, differentiation and control 1"	-4.5969	3.6362e-06
PTGIS	prostaglandin I2 synthase	-4.5824	0.00014625
EGFL7	EGF like domain multiple 7	-4.565	0.0017752
ESAM	endothelial cell adhesion molecule	-4.4347	6.5844e-06
TIE1	tyrosine kinase with immunoglobulin like and EGF like domains 1	-4.3081	1.8821e-05
MGMT	O-6-methylguanine-DNA methyltransferase	-4.2335	0.00049999
GRASP	general receptor for phosphoinositides 1 associated scaffold protein	-4.2233	0.00012357
CA2	carbonic anhydrase 2	-4.1837	0.0020524
JAM3	junctional adhesion molecule 3	-4.1231	8.3036e-06
MGST1	microsomal glutathione S-transferase 1	-4.1215	0.040515
BCL6B	BCL6B transcription repressor	-4.0838	0.00027671
FAT1	FAT atypical cadherin 1	-4.0769	9.7212e-07
VWF	von Willebrand factor	-4.0661	0.0027826
GPR4	G protein-coupled receptor 4	-4.0643	0.0022625
MYRIP	myosin VIIA and Rab interacting protein	-4.0602	0.00093731
SLIT2	slit guidance ligand 2	-4.0367	0.00012551
CRIP2	cysteine rich protein 2	-3.9807	1.2107e-05
ATF7IP2	activating transcription factor 7 interacting protein 2	-3.9501	6.5844e-06
MSMP	"microseminoprotein, prostate associated"	-3.939	1.7811e-06
TLE2	"TLE family member 2, transcriptional corepressor"	-3.9348	0.00014625
RHOJ	ras homolog family member J	-3.9106	2.5364e-05
LINC01018	long intergenic non-protein coding RNA 1018	-3.898	0.0010618
CST6	cystatin E/M	-3.8689	0.00044459
GATA2-AS1	GATA2 antisense RNA 1	-3.8514	0.00010525
CLDN5	claudin 5	-3.8371	0.00014293
EDIL3	EGF like repeats and discoidin domains 3	-3.7965	0.04898
CALD1	caldesmon 1	-3.7608	0.010472
GIMAP8	"GTPase, IMAP family member 8"	-3.7582	0.015667
ZNF366	zinc finger protein 366	-3.7554	3.0979e-05
SHISA3	shisa family member 3	-3.7277	0.030699
ABCA3	ATP binding cassette subfamily A member 3	-3.6657	2.9146e-06
TIMP3	TIMP metallopeptidase inhibitor 3	-3.6413	0.00043009
CRLF1	cytokine receptor like factor 1	-3.6344	0.0030817
SULF1	sulfatase 1	-3.6332	0.019289
DNASE1L3	deoxyribonuclease 1 like 3	-3.6175	1.3168e-06
LINC00839	long intergenic non-protein coding RNA 839	-3.593	0.00023291
TEK	TEK receptor tyrosine kinase	-3.5776	0.00084348
ERG	ETS transcription factor ERG	-3.5704	0.00011196
ARRDC4	arrestin domain containing 4	-3.5689	0.014357
TRHDE-AS1	TRHDE antisense RNA 1	-3.5578	0.00098828
WASF3	WASP family member 3	-3.5423	1.3138e-05
PRICKLE1	prickle planar cell polarity protein 1	-3.5148	0.00033086
GIMAP6	"GTPase, IMAP family member 6"	-3.4665	0.029897
GPR143	G protein-coupled receptor 143	-3.4545	0.00019814
FMO3	flavin containing dimethylaniline monoxygenase 3	-3.431	2.8296e-05
TOX	thymocyte selection associated high mobility group box	-3.4188	0.001199
FRY	FRY microtubule binding protein	-3.4019	0.0071191
ZFHX4-AS1	ZFHX4 antisense RNA 1	-3.3838	0.00016602
PECAM1	platelet and endothelial cell adhesion molecule 1	-3.3794	0.0021495
GIMAP2	"GTPase, IMAP family member 2"	-3.2715	0.00091674
APLN	apelin	-3.2641	0.00010919
SCML1	Scm polycomb group protein like 1	-3.2326	8.3036e-06
CACNG6	calcium voltage-gated channel auxiliary subunit gamma 6	-3.2312	2.2204e-05
NES	nestin	-3.186	8.0373e-05
MPZL3	myelin protein zero like 3	-3.1459	6.5844e-06
RASL10A	RAS like family 10 member A	-3.0988	7.1825e-05
GIMAP4	"GTPase, IMAP family member 4"	-3.0913	0.035377
TDRD10	tudor domain containing 10	-3.0513	2.2997e-05
EFNA1	ephrin A1	-3.0226	4.6187e-05
RAMP2	receptor activity modifying protein 2	-3.0045	0.00014605
RAB17	"RAB17, member RAS oncogene family"	-3.0023	0.00049342
DYSF	dysferlin	-2.9944	0.001539
LRRC32	leucine rich repeat containing 32	-2.9833	0.00051246
FAM117A	family with sequence similarity 117 member A	-2.9695	6.7281e-05
ST6GAL1	"ST6 beta-galactoside alpha-2,6-sialyltransferase 1"	-2.9674	0.00015793
PLAC9	placenta associated 9	-2.941	3.0882e-06
ANXA8L1	annexin A8 like 1	-2.9336	0.0052825
PTGS1	prostaglandin-endoperoxide synthase 1	-2.9253	0.0047089
PIK3C2B	phosphatidylinositol-4-phosphate 3-kinase catalytic subunit type 2 beta	-2.9236	0.00020393
PLCB2	phospholipase C beta 2	-2.921	0.02434
NRN1	neuritin 1	-2.9174	0.001567
EPB41L4A	erythrocyte membrane protein band 4.1 like 4A	-2.8915	0.016121
KLHL6	kelch like family member 6	-2.8772	9.5991e-06
OSBPL10	oxysterol binding protein like 10	-2.8635	0.0016796
PCSK9	proprotein convertase subtilisin/kexin type 9	-2.8551	0.00010919
ZNF682	zinc finger protein 682	-2.8486	1.3622e-05
S1PR1	sphingosine-1-phosphate receptor 1	-2.8427	0.0012297
CD34	CD34 molecule	-2.8332	0.00045358
CADM3	cell adhesion molecule 3	-2.8289	0.0059764
LOC101060179	uncharacterized LOC101060179	-2.8138	6.3624e-05
DHH	desert hedgehog signaling molecule	-2.8129	5.052e-05
GPD1L	glycerol-3-phosphate dehydrogenase 1 like	-2.802	0.0040765
HES1	hes family bHLH transcription factor 1	-2.7967	0.0001966
GAS1	growth arrest specific 1	-2.7958	0.012763
MGAT4A	"alpha-1,3-mannosyl-glycoprotein 4-beta-N-acetylglucosaminyltransferase A"	-2.7939	0.023231
FAM78A	family with sequence similarity 78 member A	-2.7805	0.00014595
MLIP	muscular LMNA interacting protein	-2.7681	0.00018557
SH2D3C	SH2 domain containing 3C	-2.7382	0.0010198
CYB5R2	cytochrome b5 reductase 2	-2.7366	2.8889e-05
SCARA3	scavenger receptor class A member 3	-2.7272	0.014626
NEIL1	nei like DNA glycosylase 1	-2.7222	0.00033264
LITAF	lipopolysaccharide induced TNF factor	-2.6991	0.00035362
CD93	CD93 molecule	-2.686	0.0050379
SOX18	SRY-box transcription factor 18	-2.6791	0.00040271
DPEP2	dipeptidase 2	-2.6786	0.00048071
PALD1	phosphatase domain containing paladin 1	-2.6676	0.0003996
S1PR4	sphingosine-1-phosphate receptor 4	-2.6636	0.0016758
BTG2	BTG anti-proliferation factor 2	-2.6619	1.0274e-05
C1orf115	chromosome 1 open reading frame 115	-2.6541	0.00075589
RUNDC3B	RUN domain containing 3B	-2.6485	0.00020503
CLUHP3	clustered mitochondria homolog pseudogene 3	-2.6431	0.00020475
MCAM	melanoma cell adhesion molecule	-2.6382	4.9694e-05
FLI1	"Fli-1 proto-oncogene, ETS transcription factor"	-2.6336	0.00099822
ALDH1A3	aldehyde dehydrogenase 1 family member A3	-2.6196	6.5844e-06
PTK7	protein tyrosine kinase 7 (inactive)	-2.6145	0.00049045
HSPA12B	heat shock protein family A (Hsp70) member 12B	-2.6075	0.027518
MSRA	methionine sulfoxide reductase A	-2.6073	0.0001869
SOX7	SRY-box transcription factor 7	-2.5671	0.0003438
ZNF219	zinc finger protein 219	-2.5627	6.9333e-05
SLCO2A1	solute carrier organic anion transporter family member 2A1	-2.5538	0.001264
NRARP	NOTCH regulated ankyrin repeat protein	-2.535	1.0038e-05
LTBP2	latent transforming growth factor beta binding protein 2	-2.5128	5.8481e-05
TMEM130	transmembrane protein 130	-2.5105	0.0035766
RGS5	regulator of G protein signaling 5	-2.5012	3.2785e-05
TP53I11	tumor protein p53 inducible protein 11	-2.4992	0.00084348
RBP7	retinol binding protein 7	-2.4915	0.0069685
ROBO4	roundabout guidance receptor 4	-2.487	0.002873
ITGA11	integrin subunit alpha 11	-2.4784	6.58e-05
GLIS1	GLIS family zinc finger 1	-2.4699	0.027006
FAM177B	family with sequence similarity 177 member B	-2.4623	0.028975
CDH13	cadherin 13	-2.4587	0.013156
ATP6V0A4	ATPase H+ transporting V0 subunit a4	-2.4564	6.7281e-05
ZNF573	zinc finger protein 573	-2.4406	1.2325e-05
PDGFB	platelet derived growth factor subunit B	-2.4241	0.022117
LRRC70	leucine rich repeat containing 70	-2.4056	8.2969e-05
FAM167B	family with sequence similarity 167 member B	-2.4043	8.0373e-05
EFEMP1	EGF containing fibulin extracellular matrix protein 1	-2.3928	0.0045366
ZNF300P1	zinc finger protein 300 pseudogene 1	-2.3916	3.294e-05
MALL	"mal, T cell differentiation protein like"	-2.3869	0.0040021
SRSF8	serine and arginine rich splicing factor 8	-2.3833	0.0013117
NRGN	neurogranin	-2.3756	2.5364e-05
FBLIM1	filamin binding LIM protein 1	-2.3582	6.7566e-05
CD200	CD200 molecule	-2.3553	0.016576
MANSC1	MANSC domain containing 1	-2.3434	0.00086448
CDH10	cadherin 10	-2.3326	0.0016257
FPR3	formyl peptide receptor 3	-2.3316	0.033184
CDH5	cadherin 5	-2.3303	4.0973e-05
FLJ45513	uncharacterized LOC729220	-2.3167	0.0042019
ST6GALNAC1	"ST6 N-acetylgalactosaminide alpha-2,6-sialyltransferase 1"	-2.3023	0.0005313
SH3BP5	SH3 domain binding protein 5	-2.3013	0.0021269
THEM6	thioesterase superfamily member 6	-2.2929	2.3134e-05
TLE4	"TLE family member 4, transcriptional corepressor"	-2.2906	0.040759
ICAM2	intercellular adhesion molecule 2	-2.2831	0.0010124
ARHGDIB	Rho GDP dissociation inhibitor beta	-2.2757	0.00021434
CRIP1	cysteine rich protein 1	-2.2677	0.0024185
NLRP12	NLR family pyrin domain containing 12	-2.2631	0.00010919
DCDC2	doublecortin domain containing 2	-2.2487	0.0095957
TM6SF1	transmembrane 6 superfamily member 1	-2.2399	0.0048949
GRAP	GRB2 related adaptor protein	-2.2381	0.00091472
FAM189A2	family with sequence similarity 189 member A2	-2.2315	0.0066319
FAM124B	family with sequence similarity 124 member B	-2.2271	0.00040525
MYO5C	myosin VC	-2.2265	9.9214e-05
LTB	lymphotoxin beta	-2.2233	1.2008e-05
KIAA1549L	KIAA1549 like	-2.2134	0.00035775
HHEX	hematopoietically expressed homeobox	-2.2118	0.00048289
ADCY4	adenylate cyclase 4	-2.2038	0.0017325
PGF	placental growth factor	-2.2008	0.00021247
SUSD5	sushi domain containing 5	-2.2001	0.00098949
CKB	creatine kinase B	-2.1994	0.00055484
RASGRP1	RAS guanyl releasing protein 1	-2.1912	0.0062558
SIM1	SIM bHLH transcription factor 1	-2.1873	0.00053951
RBPMS2	"RNA binding protein, mRNA processing factor 2"	-2.1657	5.699e-05
CXCL12	C-X-C motif chemokine ligand 12	-2.1619	0.00023977
FRMPD4	FERM and PDZ domain containing 4	-2.1607	0.0042624
RFTN1	"raftlin, lipid raft linker 1"	-2.1566	0.0005369
LOC730183	uncharacterized LOC730183	-2.1416	0.00049635
NOVA2	NOVA alternative splicing regulator 2	-2.1415	0.0051827
TMA7	translation machinery associated 7 homolog	-2.1414	1.537e-05
CMTM7	CKLF like MARVEL transmembrane domain containing 7	-2.1382	3.2314e-05
NUP210	nucleoporin 210	-2.1225	0.010488
MFAP2	microfibril associated protein 2	-2.1222	0.0025137
P3H2	prolyl 3-hydroxylase 2	-2.1144	0.0036441
TSTA3	tissue specific transplantation antigen P35B	-2.1108	9.1103e-05
RIPK3	receptor interacting serine/threonine kinase 3	-2.11	0.0001869
NFATC1	nuclear factor of activated T cells 1	-2.0966	0.010382
GNA14	G protein subunit alpha 14	-2.0966	0.041208
PCDH1	protocadherin 1	-2.095	0.0090831
CCDC88C	coiled-coil domain containing 88C	-2.0823	7.2976e-06
LPAR6	lysophosphatidic acid receptor 6	-2.0757	0.00084348
TUSC1	tumor suppressor candidate 1	-2.0721	3.2785e-05
RAMP2-AS1	RAMP2 antisense RNA 1	-2.0552	0.0002304
HTR1D	5-hydroxytryptamine receptor 1D	-2.0545	6.6724e-05
ARHGAP31	Rho GTPase activating protein 31	-2.0537	0.00079162
TCF4	transcription factor 4	-2.0513	0.0019478
LPCAT2	lysophosphatidylcholine acyltransferase 2	-2.0483	0.00055484
LAMP3	lysosomal associated membrane protein 3	-2.0312	0.013426
C1QTNF5	C1q and TNF related 5	-2.0305	0.0069127
ACTG2	"actin gamma 2, smooth muscle"	-2.0271	0.00012324
CPNE5	copine 5	-2.0251	0.04238
SNRK	SNF related kinase	-2.0249	2.5364e-05
UNC5B	unc-5 netrin receptor B	-2.0244	0.0073773
PIPOX	pipecolic acid and sarcosine oxidase	-2.0209	4.0153e-05
GRAMD1B	GRAM domain containing 1B	-2.0207	1.8206e-05
ICA1	islet cell autoantigen 1	-2.0204	0.00027048
RAPGEF4	Rap guanine nucleotide exchange factor 4	-2.0141	0.0015979
SCARF1	scavenger receptor class F member 1	-2.0117	0.0060283
HCLS1	hematopoietic cell-specific Lyn substrate 1	-2.0091	0.0054008
ARVCF	ARVCF delta catenin family member	-2.008	0.0020165
FUT1	fucosyltransferase 1 (H blood group)	-2.004	0.0015742
CGA	"glycoprotein hormones, alpha polypeptide"	-2.0033	0.00032912
CLEC14A	C-type lectin domain containing 14A	-1.9994	8.2749e-05
ENTPD1	ectonucleoside triphosphate diphosphohydrolase 1	-1.9986	0.00020503
TACSTD2	tumor associated calcium signal transducer 2	-1.9938	0.0003661
CETP	cholesteryl ester transfer protein	-1.9881	0.00023682
TNFRSF10C	TNF receptor superfamily member 10c	-1.9864	0.0015055
AIF1L	allograft inflammatory factor 1 like	-1.9822	0.010919
NICN1	nicolin 1	-1.9789	0.00022169
ADPRH	ADP-ribosylarginine hydrolase	-1.9781	0.0002722
FLNB	filamin B	-1.9748	0.001261
ABCB1	ATP binding cassette subfamily B member 1	-1.9732	0.00012357
KIAA1217	KIAA1217	-1.9731	0.0024517
ABCG1	ATP binding cassette subfamily G member 1	-1.972	0.0018578
TM4SF18	transmembrane 4 L six family member 18	-1.964	5.1793e-05
HID1	HID1 domain containing	-1.9606	0.03885
PTGFRN	prostaglandin F2 receptor inhibitor	-1.9604	0.00020503
NOX4	NADPH oxidase 4	-1.9583	0.0051853
CD274	CD274 molecule	-1.9542	3.0979e-05
ZNF879	zinc finger protein 879	-1.9464	0.00013384
PTPRB	protein tyrosine phosphatase receptor type B	-1.9464	0.0013907
ATP8B1	ATPase phospholipid transporting 8B1	-1.9413	3.294e-05
ZNF681	zinc finger protein 681	-1.9347	0.010873
PHGDH	phosphoglycerate dehydrogenase	-1.9228	6.7281e-05
LYPD1	LY6/PLAUR domain containing 1	-1.9216	0.0089307
RPL39L	ribosomal protein L39 like	-1.9191	0.0069886
MGARP	mitochondria localized glutamic acid rich protein	-1.9116	0.014932
TFAP2A	transcription factor AP-2 alpha	-1.9115	9.2077e-05
PLSCR4	phospholipid scramblase 4	-1.8885	0.007167
C1QL1	complement C1q like 1	-1.8883	0.0059434
PLXND1	plexin D1	-1.8854	9.9214e-05
HYAL2	hyaluronidase 2	-1.8783	0.00031851
ACAA1	acetyl-CoA acyltransferase 1	-1.8674	9.9214e-05
TMEM61	transmembrane protein 61	-1.866	0.0054428
GHRLOS	ghrelin opposite strand/antisense RNA	-1.862	0.00021781
TXNDC5	thioredoxin domain containing 5	-1.8599	0.0027575
ASB9	ankyrin repeat and SOCS box containing 9	-1.8566	0.0067698
LOC100129098	translation initiation factor IF-2	-1.8532	0.00025909
COL5A3	collagen type V alpha 3 chain	-1.8519	0.0047852
FBLN2	fibulin 2	-1.8506	0.032504
PRKCH	protein kinase C eta	-1.8483	0.0068116
BOK	BCL2 family apoptosis regulator BOK	-1.848	0.0036221
DENND2A	DENN domain containing 2A	-1.8425	0.024966
GRM2	glutamate metabotropic receptor 2	-1.8347	0.00019457
TSPAN2	tetraspanin 2	-1.8295	0.030468
MEF2C	myocyte enhancer factor 2C	-1.8289	0.0045727
CCDC153	coiled-coil domain containing 153	-1.8286	7.6534e-05
FAM169A	family with sequence similarity 169 member A	-1.8268	0.010603
NR4A1	nuclear receptor subfamily 4 group A member 1	-1.8259	0.046825
TPM1	tropomyosin 1	-1.824	0.01616
PAPPA	pappalysin 1	-1.821	0.0072026
SLC22A18AS	solute carrier family 22 member 18 antisense	-1.8168	0.02962
THSD1	thrombospondin type 1 domain containing 1	-1.815	0.00050906
CAMK1D	calcium/calmodulin dependent protein kinase ID	-1.7934	0.00089207
EFHB	EF-hand domain family member B	-1.7905	7.753e-05
ZNF14	zinc finger protein 14	-1.7892	0.00017249
ID3	"inhibitor of DNA binding 3, HLH protein"	-1.7733	3.5123e-05
TMEM204	transmembrane protein 204	-1.7714	0.018449
INPP5J	inositol polyphosphate-5-phosphatase J	-1.7673	0.00013873
UBP1	upstream binding protein 1	-1.7507	7.7226e-05
ATP8A1	ATPase phospholipid transporting 8A1	-1.7484	0.04306
DOCK9	dedicator of cytokinesis 9	-1.7468	0.00037096
EPHB6	EPH receptor B6	-1.7465	0.034972
LOC100506411	uncharacterized LOC100506411	-1.7445	0.00044385
NUPR1	"nuclear protein 1, transcriptional regulator"	-1.7431	0.0049998
COL4A6	collagen type IV alpha 6 chain	-1.7414	0.00049921
PLK2	polo like kinase 2	-1.7341	0.018865
ZNF660	zinc finger protein 660	-1.7339	0.021021
ASS1	argininosuccinate synthase 1	-1.7317	0.003588
HES5	hes family bHLH transcription factor 5	-1.7314	0.019986
CDIP1	cell death inducing p53 target 1	-1.7309	0.00023774
ZNF253	zinc finger protein 253	-1.727	0.0002304
ZNF738	zinc finger protein 738	-1.7214	6.4215e-05
TMEM145	transmembrane protein 145	-1.7208	0.00089822
AKTIP	AKT interacting protein	-1.7204	0.00014356
ZNF792	zinc finger protein 792	-1.7202	0.00021882
MYOD1	myogenic differentiation 1	-1.7201	0.0001298
KCNK2	potassium two pore domain channel subfamily K member 2	-1.7086	0.041827
MVB12B	multivesicular body subunit 12B	-1.7061	0.0028614
TKT	transketolase	-1.6975	4.0067e-05
HTRA4	HtrA serine peptidase 4	-1.6969	0.00077992
GALNT16	polypeptide N-acetylgalactosaminyltransferase 16	-1.6956	0.00020475
CD9	CD9 molecule	-1.693	0.0054008
CXADR	CXADR Ig-like cell adhesion molecule	-1.6886	0.011131
LRRC4C	leucine rich repeat containing 4C	-1.6879	0.0020086
ECSCR	endothelial cell surface expressed chemotaxis and apoptosis regulator	-1.678	0.014819
WSCD1	WSC domain containing 1	-1.6761	0.020955
MTMR9LP	"myotubularin related protein 9 like, pseudogene"	-1.6713	0.0025791
ZNF433	zinc finger protein 433	-1.6707	0.00018932
TRIM7	tripartite motif containing 7	-1.6584	0.012406
SOCS2	suppressor of cytokine signaling 2	-1.6582	0.00025709
FAM162A	family with sequence similarity 162 member A	-1.6554	3.7796e-05
LYL1	LYL1 basic helix-loop-helix family member	-1.6551	0.00086251
RUNX3	RUNX family transcription factor 3	-1.6537	8.7061e-05
SCUBE2	"signal peptide, CUB domain and EGF like domain containing 2"	-1.6457	0.00011196
ZNF43	zinc finger protein 43	-1.6407	3.989e-05
SKIDA1	SKI/DACH domain containing 1	-1.6351	0.0021495
ACKR4	atypical chemokine receptor 4	-1.6295	0.00055013
PHLDB1	pleckstrin homology like domain family B member 1	-1.6282	4.4654e-05
SYBU	syntabulin	-1.6259	0.038488
AR	androgen receptor	-1.6258	0.0002325
TMEM217	transmembrane protein 217	-1.621	0.0016987
ZNF30	zinc finger protein 30	-1.6195	0.0015728
ZNF662	zinc finger protein 662	-1.6134	0.00055652
MST1R	macrophage stimulating 1 receptor	-1.6112	0.00020475
FAM110D	family with sequence similarity 110 member D	-1.6108	0.0022162
USHBP1	USH1 protein network component harmonin binding protein 1	-1.6107	0.00011883
CHRNB1	cholinergic receptor nicotinic beta 1 subunit	-1.6104	0.00015625
ZNF671	zinc finger protein 671	-1.6077	0.00030519
ST3GAL6	"ST3 beta-galactoside alpha-2,3-sialyltransferase 6"	-1.6067	0.00048289
COX17	cytochrome c oxidase copper chaperone COX17	-1.6044	4.9694e-05
RAB15	"RAB15, member RAS oncogene family"	-1.6013	0.038712
TMEM43	transmembrane protein 43	-1.6011	8.0373e-05
EPB41L3	erythrocyte membrane protein band 4.1 like 3	-1.5988	0.00019955
RIPPLY3	ripply transcriptional repressor 3	-1.5965	0.0095415
ST3GAL1	"ST3 beta-galactoside alpha-2,3-sialyltransferase 1"	-1.596	0.0037158
PRKCD	protein kinase C delta	-1.5946	0.00015571
EPPK1	epiplakin 1	-1.5901	0.0020102
CSRNP1	cysteine and serine rich nuclear protein 1	-1.5894	0.0016031
BGN	biglycan	-1.5841	0.0022386
SLC7A11	solute carrier family 7 member 11	-1.5819	0.00041694
ABHD14B	abhydrolase domain containing 14B	-1.5794	4.2131e-05
EOGT	EGF domain specific O-linked N-acetylglucosamine transferase	-1.5767	0.00084629
C2CD4A	C2 calcium dependent domain containing 4A	-1.5741	0.0089056
PHF7	PHD finger protein 7	-1.574	0.00014103
RAMP1	receptor activity modifying protein 1	-1.5676	0.008702
TMEM155	transmembrane protein 155	-1.5642	0.037326
CMTM8	CKLF like MARVEL transmembrane domain containing 8	-1.5609	0.00031097
NISCH	nischarin	-1.5605	0.00058675
ITGB3	integrin subunit beta 3	-1.5584	0.0017679
ADAM23	ADAM metallopeptidase domain 23	-1.5582	0.00049635
PDCD6IP	programmed cell death 6 interacting protein	-1.5572	0.00011883
HYAL1	hyaluronidase 1	-1.5558	0.0027213
TCF7L1	transcription factor 7 like 1	-1.5553	0.00256
RNF144B	ring finger protein 144B	-1.5548	0.0025992
ADAMTS4	ADAM metallopeptidase with thrombospondin type 1 motif 4	-1.5446	0.0076513
SEMA3G	semaphorin 3G	-1.5405	0.0020984
SMARCC1	"SWI/SNF related, matrix associated, actin dependent regulator of chromatin subfamily c member 1"	-1.5378	0.00054571
PPM1H	"protein phosphatase, Mg2+/Mn2+ dependent 1H"	-1.5363	0.0001145
PBRM1	polybromo 1	-1.5336	8.8388e-05
HRK	"harakiri, BCL2 interacting protein"	-1.5334	0.049053
RPL29P2	ribosomal protein L29 pseudogene 2	-1.5313	6.4215e-05
MRPS25	mitochondrial ribosomal protein S25	-1.5306	0.00024139
CALCRL	calcitonin receptor like receptor	-1.5301	0.0028508
NKTR	natural killer cell triggering receptor	-1.5296	2.5364e-05
TSPYL4	TSPY like 4	-1.5279	0.016929
SENP7	SUMO specific peptidase 7	-1.5278	0.0001271
PLA1A	phospholipase A1 member A	-1.5226	0.0010979
PAWR	pro-apoptotic WT1 regulator	-1.5223	0.019575
ZSCAN18	zinc finger and SCAN domain containing 18	-1.5218	0.00042697
AMT	aminomethyltransferase	-1.5209	0.00014595
APPL1	"adaptor protein, phosphotyrosine interacting with PH domain and leucine zipper 1"	-1.5197	6.2327e-05
LINC01013	long intergenic non-protein coding RNA 1013	-1.5093	0.036459
TEKT4	tektin 4	-1.5076	0.00053951
FIBIN	fin bud initiation factor homolog	-1.5071	0.0024034
TIMM8B	translocase of inner mitochondrial membrane 8 homolog B	-1.5069	9.9214e-05
TGM2	transglutaminase 2	-1.5044	0.033356
CDC25A	cell division cycle 25A	-1.5038	0.00021081
LOC154761	"family with sequence similarity 115, member C pseudogene"	-1.5013	0.0050077
SNORD116-19	"small nucleolar RNA, C/D box 116-19"	-1.4966	0.007368
ZBTB46	zinc finger and BTB domain containing 46	-1.4877	0.030882
EPAS1	endothelial PAS domain protein 1	-1.4863	0.00023356
KRT14	keratin 14	-1.4849	7.7331e-05
PKIB	cAMP-dependent protein kinase inhibitor beta	-1.4848	0.0029673
PRKXP1	PRKX pseudogene 1	-1.4838	0.00052202
ZG16B	zymogen granule protein 16B	-1.483	0.0054008
PPM1M	"protein phosphatase, Mg2+/Mn2+ dependent 1M"	-1.4803	6.0873e-05
KBTBD8	kelch repeat and BTB domain containing 8	-1.4772	0.0031529
SPOCK2	"SPARC (osteonectin), cwcv and kazal like domains proteoglycan 2"	-1.476	0.00019457
SLC25A20	solute carrier family 25 member 20	-1.4746	0.00061904
HEMK1	HemK methyltransferase family member 1	-1.4718	0.00020503
RPSAP52	ribosomal protein SA pseudogene 52	-1.4697	5.1793e-05
GLYCTK	glycerate kinase	-1.4658	0.00050675
UBASH3B	ubiquitin associated and SH3 domain containing B	-1.4635	0.0027134
RPSAP9	ribosomal protein SA pseudogene 9	-1.459	6.2468e-05
SORBS1	sorbin and SH3 domain containing 1	-1.4585	0.0087013
ZNF443	zinc finger protein 443	-1.4552	0.0008524
FAXC	"failed axon connections homolog, metaxin like GST domain containing"	-1.4524	0.041578
TAMM41	TAM41 mitochondrial translocator assembly and maintenance homolog	-1.4513	0.0001869
RRP9	"ribosomal RNA processing 9, U3 small nucleolar RNA binding protein"	-1.4504	0.00010919
ACVR2B	activin A receptor type 2B	-1.4496	0.0015941
SCAMP5	secretory carrier membrane protein 5	-1.446	0.00044289
KAT2B	lysine acetyltransferase 2B	-1.4437	0.00015242
KCNJ6	potassium inwardly rectifying channel subfamily J member 6	-1.4424	0.0024943
RHPN1	rhophilin Rho GTPase binding protein 1	-1.4389	0.015619
RPSAP58	ribosomal protein SA pseudogene 58	-1.4324	6.7566e-05
DMTN	dematin actin binding protein	-1.4309	0.0012941
POGLUT1	protein O-glucosyltransferase 1	-1.427	0.00019457
GSDMD	gasdermin D	-1.4269	0.00071336
CRBN	cereblon	-1.426	5.6708e-05
CTDSPL	CTD small phosphatase like	-1.4248	0.012523
CNOT10	CCR4-NOT transcription complex subunit 10	-1.4241	0.0002304
ZNF506	zinc finger protein 506	-1.4212	0.00037586
ZNF571	zinc finger protein 571	-1.4189	0.00013874
ADORA1	adenosine A1 receptor	-1.4189	0.00034141
RNF150	ring finger protein 150	-1.4152	0.0090756
PURG	purine rich element binding protein G	-1.4133	0.00033612
TMEM45A	transmembrane protein 45A	-1.4129	0.0011798
CYP4Z1	cytochrome P450 family 4 subfamily Z member 1	-1.4103	0.00014011
CNN1	calponin 1	-1.4101	0.021738
ZNF93	zinc finger protein 93	-1.4045	0.00088143
CAMK1	calcium/calmodulin dependent protein kinase I	-1.3966	0.0012993
WDR48	WD repeat domain 48	-1.3901	0.0002837
SYT15	synaptotagmin 15	-1.3894	0.014306
MECOM	MDS1 and EVI1 complex locus	-1.3882	0.00011196
KIAA1549	KIAA1549	-1.3881	0.017759
JUP	junction plakoglobin	-1.3851	0.0015952
HACL1	2-hydroxyacyl-CoA lyase 1	-1.3832	0.0025465
IP6K1	inositol hexakisphosphate kinase 1	-1.3756	0.00055652
PPP1R13B	protein phosphatase 1 regulatory subunit 13B	-1.3726	0.0024936
MUSTN1	"musculoskeletal, embryonic nuclear protein 1"	-1.3724	0.00029577
ZFPM2	"zinc finger protein, FOG family member 2"	-1.3701	0.0012366
SLC4A11	solute carrier family 4 member 11	-1.369	0.0035788
SFN	stratifin	-1.3686	0.00078185
PRKX	protein kinase X-linked	-1.3674	0.00013874
CCNE2	cyclin E2	-1.3673	0.019175
PTPN23	protein tyrosine phosphatase non-receptor type 23	-1.3667	0.00021522
CMTM6	CKLF like MARVEL transmembrane domain containing 6	-1.3636	0.00070851
ZNF781	zinc finger protein 781	-1.3633	0.0027936
C6orf141	chromosome 6 open reading frame 141	-1.3626	0.0043314
ZNF799	zinc finger protein 799	-1.3616	0.00033348
DYNC1LI1	dynein cytoplasmic 1 light intermediate chain 1	-1.3582	0.00067211
DNAH1	dynein axonemal heavy chain 1	-1.358	0.0002325
ST6GALNAC3	"ST6 N-acetylgalactosaminide alpha-2,6-sialyltransferase 3"	-1.3567	0.03921
TM4SF1	transmembrane 4 L six family member 1	-1.3542	0.0011326
LINC01322	long intergenic non-protein coding RNA 1322	-1.3511	0.012018
LOC101929089	uncharacterized LOC101929089	-1.3499	0.0014899
PDCD4	programmed cell death 4	-1.3497	0.0017905
JAGN1	jagunal homolog 1	-1.3449	0.00080242
CEACAM1	CEA cell adhesion molecule 1	-1.3444	0.0026268
TRNT1	tRNA nucleotidyl transferase 1	-1.3424	0.00010919
MAP3K1	mitogen-activated protein kinase kinase kinase 1	-1.3393	0.03272
BTD	biotinidase	-1.339	0.00015145
DBNDD1	dysbindin domain containing 1	-1.3389	0.00068513
ARPC4	actin related protein 2/3 complex subunit 4	-1.3363	6.7281e-05
SFMBT1	Scm like with four mbt domains 1	-1.3347	0.0016022
RPL29	ribosomal protein L29	-1.3346	0.00010382
ERMP1	endoplasmic reticulum metallopeptidase 1	-1.3313	0.00062776
GNAI2	G protein subunit alpha i2	-1.3275	0.0015385
KRT17	keratin 17	-1.3255	0.00055484
PHACTR2	phosphatase and actin regulator 2	-1.3221	0.00088464
DAG1	dystroglycan 1	-1.3216	0.00026895
TMEM253	transmembrane protein 253	-1.3209	0.0014138
MTMR2	myotubularin related protein 2	-1.3174	0.00020299
WDR82	WD repeat domain 82	-1.3166	8.1633e-05
CMSS1	cms1 ribosomal small subunit homolog	-1.3144	0.00096714
METTL25	methyltransferase like 25	-1.3133	0.00023682
SMIM4	small integral membrane protein 4	-1.3123	0.0012234
IP6K2	inositol hexakisphosphate kinase 2	-1.3105	0.0021495
TRAIP	TRAF interacting protein	-1.3101	0.00053624
LZTFL1	leucine zipper transcription factor like 1	-1.31	0.0014076
PCBP4	poly(rC) binding protein 4	-1.309	0.00012157
LRRC58	leucine rich repeat containing 58	-1.3073	0.0050558
SLC46A1	solute carrier family 46 member 1	-1.3021	0.0020004
MLH1	mutL homolog 1	-1.3019	0.0010936
RNF145	ring finger protein 145	-1.3017	0.0025608
PPP1R16B	protein phosphatase 1 regulatory subunit 16B	-1.3001	0.00043401
CCNO	cyclin O	-1.2973	0.032868
ZC4H2	zinc finger C4H2-type containing	-1.2937	0.023295
ZNF626	zinc finger protein 626	-1.2931	0.00014001
RCSD1	RCSD domain containing 1	-1.2922	0.018232
RBM6	RNA binding motif protein 6	-1.2904	0.00015242
RGS3	regulator of G protein signaling 3	-1.2886	0.0089307
SP6	Sp6 transcription factor	-1.2881	0.00014638
TRMT10C	"tRNA methyltransferase 10C, mitochondrial RNase P subunit"	-1.2879	0.00055124
A1BG	alpha-1-B glycoprotein	-1.2876	0.0014614
CARD17	caspase recruitment domain family member 17	-1.285	0.0026555
EIF1B	eukaryotic translation initiation factor 1B	-1.2835	0.00094646
SLMAP	sarcolemma associated protein	-1.2811	0.00031851
STK10	serine/threonine kinase 10	-1.2806	0.0020806
ZNF582-AS1	ZNF582 antisense RNA 1 (head to head)	-1.2788	0.00049104
EMC3	ER membrane protein complex subunit 3	-1.2715	0.0001869
FANCD2	FA complementation group D2	-1.2697	0.00010755
TIMMDC1	translocase of inner mitochondrial membrane domain containing 1	-1.2692	0.00019814
DCP1A	decapping mRNA 1A	-1.2672	0.0021502
SS18L2	SS18 like 2	-1.2656	0.00054007
PDK4	pyruvate dehydrogenase kinase 4	-1.2641	0.021408
CBL	Cbl proto-oncogene	-1.2638	0.0027153
CASP1	caspase 1	-1.2626	0.00080816
LOC101928370	uncharacterized LOC101928370	-1.2617	0.027126
ARHGAP26	Rho GTPase activating protein 26	-1.2601	0.00055758
KLHL18	kelch like family member 18	-1.2595	0.00044385
RPL15	ribosomal protein L15	-1.258	0.00014736
FAM76B	family with sequence similarity 76 member B	-1.2576	0.00040271
PDGFRL	platelet derived growth factor receptor like	-1.2573	0.00089317
ZNF852	zinc finger protein 852	-1.2565	0.0021958
C6orf226	chromosome 6 open reading frame 226	-1.2549	0.027565
ZKSCAN7	zinc finger with KRAB and SCAN domains 7	-1.2537	0.0010424
THUMPD3-AS1	THUMPD3 antisense RNA 1	-1.2533	0.00030625
ZNF589	zinc finger protein 589	-1.2508	9.9637e-05
THOC7	THO complex 7	-1.248	0.00028631
UQCRC1	ubiquinol-cytochrome c reductase core protein 1	-1.2466	0.00011687
LARS2	"leucyl-tRNA synthetase 2, mitochondrial"	-1.2464	0.00018817
GNRH1	gonadotropin releasing hormone 1	-1.246	0.028146
NANOS3	nanos C2HC-type zinc finger 3	-1.2445	0.001539
ELP6	elongator acetyltransferase complex subunit 6	-1.2441	0.00033207
CCM2L	CCM2 like scaffold protein	-1.243	0.010788
PTK2	protein tyrosine kinase 2	-1.2405	0.0032445
C20orf141	chromosome 20 open reading frame 141	-1.239	0.00033163
APOL3	apolipoprotein L3	-1.2367	0.0036062
SLC26A6	solute carrier family 26 member 6	-1.2312	0.0024902
SEMA6C	semaphorin 6C	-1.2279	0.0014236
DCLK1	doublecortin like kinase 1	-1.2272	0.0018458
MON1A	"MON1 homolog A, secretory trafficking associated"	-1.2264	0.0018066
TWF2	twinfilin actin binding protein 2	-1.2227	0.0011224
VSTM1	V-set and transmembrane domain containing 1	-1.2221	0.012084
ZNF630	zinc finger protein 630	-1.2204	0.0018559
YPEL2	yippee like 2	-1.2196	0.018114
BMF	Bcl2 modifying factor	-1.2184	0.00064934
PDIA5	protein disulfide isomerase family A member 5	-1.2184	0.018512
CCNI2	cyclin I family member 2	-1.2182	0.0028361
PHF10	PHD finger protein 10	-1.2174	0.0012993
TOP2B	DNA topoisomerase II beta	-1.2166	0.00074464
CHD7	chromodomain helicase DNA binding protein 7	-1.2164	0.0023458
CREBZF	CREB/ATF bZIP transcription factor	-1.216	0.0018878
EID3	EP300 interacting inhibitor of differentiation 3	-1.216	0.0026534
SPTLC2	serine palmitoyltransferase long chain base subunit 2	-1.2158	0.0005988
SLC16A4	solute carrier family 16 member 4	-1.2158	0.0048145
RAD18	RAD18 E3 ubiquitin protein ligase	-1.2152	0.00012812
CELSR3	cadherin EGF LAG seven-pass G-type receptor 3	-1.2138	0.00031097
GTF2E1	general transcription factor IIE subunit 1	-1.2137	0.00011196
RPL24	ribosomal protein L24	-1.2132	0.00024928
RBM5	RNA binding motif protein 5	-1.2124	0.00041956
ODC1	ornithine decarboxylase 1	-1.212	0.00049342
JAG1	jagged canonical Notch ligand 1	-1.2106	0.00046919
F2RL1	F2R like trypsin receptor 1	-1.2085	0.017079
MFNG	MFNG O-fucosylpeptide 3-beta-N-acetylglucosaminyltransferase	-1.2084	0.010873
PGBD3	piggyBac transposable element derived 3	-1.2077	0.029914
LINC00523	long intergenic non-protein coding RNA 523	-1.2075	0.00059846
EAF2	ELL associated factor 2	-1.2071	0.0023276
DMD	dystrophin	-1.2062	9.9214e-05
PLXNB1	plexin B1	-1.2048	0.0013657
LIPG	"lipase G, endothelial type"	-1.2047	0.0060718
ACAT1	acetyl-CoA acetyltransferase 1	-1.203	0.00021081
CNTNAP3	contactin associated protein family member 3	-1.2015	0.010228
ATP6V1A	ATPase H+ transporting V1 subunit A	-1.2006	0.00011211
IMPAD1	inositol monophosphatase domain containing 1	-1.2006	0.00014994
PDCD4-AS1	PDCD4 antisense RNA 1	-1.1999	0.019677
ACR	acrosin	-1.1993	0.0024358
CRACR2B	calcium release activated channel regulator 2B	-1.1991	0.00095186
TEX264	"testis expressed 264, ER-phagy receptor"	-1.1974	0.00062377
MOCS1	molybdenum cofactor synthesis 1	-1.1961	0.0084371
ZNF620	zinc finger protein 620	-1.1918	0.00023733
CBX2	chromobox 2	-1.1916	0.0011798
HSH2D	hematopoietic SH2 domain containing	-1.1899	0.001261
ENG	endoglin	-1.1896	0.0069685
ASIC1	acid sensing ion channel subunit 1	-1.1876	0.021044
ZW10	zw10 kinetochore protein	-1.1867	0.00017485
EPM2AIP1	EPM2A interacting protein 1	-1.1853	0.0016539
PLVAP	plasmalemma vesicle associated protein	-1.1853	0.0062317
CEP295	centrosomal protein 295	-1.1827	0.0012471
ZNF442	zinc finger protein 442	-1.1826	0.0064714
COLQ	collagen like tail subunit of asymmetric acetylcholinesterase	-1.1823	0.0072182
TMEM25	transmembrane protein 25	-1.1818	0.00052032
TMPPE	transmembrane protein with metallophosphoesterase domain	-1.1805	0.00043009
CTNNB1	catenin beta 1	-1.1803	0.00024606
AGPAT5	1-acylglycerol-3-phosphate O-acyltransferase 5	-1.1794	0.00018048
EXOC6	exocyst complex component 6	-1.1782	0.0011334
ENTPD8	ectonucleoside triphosphate diphosphohydrolase 8	-1.1775	0.034511
RHBDL3	rhomboid like 3	-1.1769	0.0055957
IRF6	interferon regulatory factor 6	-1.1769	0.017795
C11orf52	chromosome 11 open reading frame 52	-1.1764	0.0085801
MEIS1	Meis homeobox 1	-1.1746	0.0024791
RBFA	ribosome binding factor A	-1.1744	0.0030511
SULT1C4	sulfotransferase family 1C member 4	-1.1736	0.00092419
PRICKLE4	prickle planar cell polarity protein 4	-1.1729	0.00024928
NXPH3	neurexophilin 3	-1.1728	0.00024606
RPL14	ribosomal protein L14	-1.1722	0.00081662
KIAA1211L	KIAA1211 like	-1.1714	0.0035115
SLC25A29	solute carrier family 25 member 29	-1.1688	0.00089317
MSANTD2	Myb/SANT DNA binding domain containing 2	-1.168	0.0018758
XPC	"XPC complex subunit, DNA damage recognition and repair factor"	-1.1635	0.00049635
NRBP2	nuclear receptor binding protein 2	-1.1632	0.0021482
ASMTL-AS1	ASMTL antisense RNA 1	-1.1586	0.010063
RHOA	ras homolog family member A	-1.1578	0.00093624
COL8A2	collagen type VIII alpha 2 chain	-1.1577	0.001415
GNL3	G protein nucleolar 3	-1.1574	0.0016758
AFAP1L1	actin filament associated protein 1 like 1	-1.1569	0.037943
ABHD6	abhydrolase domain containing 6	-1.1565	0.0030393
ZBTB11	zinc finger and BTB domain containing 11	-1.156	0.00027518
NGLY1	N-glycanase 1	-1.1529	0.00015242
SPTA1	"spectrin alpha, erythrocytic 1"	-1.1514	0.0011224
RBM15B	RNA binding motif protein 15B	-1.1514	0.001447
IDH2	isocitrate dehydrogenase (NADP(+)) 2	-1.1513	0.00090907
HYLS1	HYLS1 centriolar and ciliogenesis associated	-1.1506	0.00056781
LHFPL4	LHFPL tetraspan subfamily member 4	-1.15	0.028368
SLC35F2	solute carrier family 35 member F2	-1.1491	0.0053844
BRI3BP	BRI3 binding protein	-1.1483	0.00031851
HIGD1A	HIG1 hypoxia inducible domain family member 1A	-1.1468	0.00016565
TGFBR2	transforming growth factor beta receptor 2	-1.1463	0.0012261
HYAL3	hyaluronidase 3	-1.1424	0.0012831
NCKIPSD	NCK interacting protein with SH3 domain	-1.1416	0.0010061
CMC1	C-X9-C motif containing 1	-1.1412	0.00085654
MKRN2	makorin ring finger protein 2	-1.139	0.00050059
ENY2	ENY2 transcription and export complex 2 subunit	-1.1385	0.012078
PRR15	proline rich 15	-1.1382	0.012397
CHEK1	checkpoint kinase 1	-1.1373	0.00030625
LRP5	LDL receptor related protein 5	-1.1342	0.00040603
CYB561D2	cytochrome b561 family member D2	-1.1339	0.00026871
CCNJL	cyclin J like	-1.1333	0.014633
SLC25A26	solute carrier family 25 member 26	-1.1306	0.0019769
WFDC1	WAP four-disulfide core domain 1	-1.1284	0.043692
E2F8	E2F transcription factor 8	-1.1283	0.0007633
LCAT	lecithin-cholesterol acyltransferase	-1.1271	0.0023546
CASP12	caspase 12 (gene/pseudogene)	-1.1249	0.014729
CHCHD4	coiled-coil-helix-coiled-coil-helix domain containing 4	-1.1245	0.00015515
CCDC174	coiled-coil domain containing 174	-1.1236	0.00023977
KIF25	kinesin family member 25	-1.1229	0.011535
ERP27	endoplasmic reticulum protein 27	-1.1228	0.0041771
VWA5A	von Willebrand factor A domain containing 5A	-1.1222	0.0013782
ZFP30	ZFP30 zinc finger protein	-1.1208	0.00018274
SUMF1	sulfatase modifying factor 1	-1.1205	0.00067243
PP12613	uncharacterized LOC100192379	-1.12	0.0128
TNK1	tyrosine kinase non receptor 1	-1.1189	0.0021495
ZNF572	zinc finger protein 572	-1.118	0.0027308
KIF15	kinesin family member 15	-1.1177	0.00037755
CLASP2	cytoplasmic linker associated protein 2	-1.1172	0.00023774
ARPC4-TTLL3	ARPC4-TTLL3 readthrough	-1.1166	0.00019457
NLRC3	NLR family CARD domain containing 3	-1.1164	0.022005
ACSS1	acyl-CoA synthetase short chain family member 1	-1.1163	0.0015824
GDAP1	ganglioside induced differentiation associated protein 1	-1.1158	0.0029731
ZBTB8B	zinc finger and BTB domain containing 8B	-1.1144	0.00091472
SPICE1	spindle and centriole associated protein 1	-1.1137	0.0015348
CFP	complement factor properdin	-1.1131	0.038174
CLDN14	claudin 14	-1.1116	0.001513
C2CD2L	C2CD2 like	-1.1103	0.0057883
LTF	lactotransferrin	-1.109	0.0020999
EBLN2	endogenous Bornavirus like nucleoprotein 2	-1.109	0.0043572
SLC35A5	solute carrier family 35 member A5	-1.106	0.00093745
SEMA4D	semaphorin 4D	-1.1043	0.0018559
ZBTB11-AS1	ZBTB11 antisense RNA 1	-1.104	0.00049084
DENND6A	DENN domain containing 6A	-1.1034	0.00024519
ZNF563	zinc finger protein 563	-1.1023	0.00026077
WNK4	WNK lysine deficient protein kinase 4	-1.1015	0.0012471
CARD16	caspase recruitment domain family member 16	-1.1014	0.016156
MANF	mesencephalic astrocyte derived neurotrophic factor	-1.1008	0.00048152
OXSR1	oxidative stress responsive kinase 1	-1.1007	0.0015979
APOBEC2	apolipoprotein B mRNA editing enzyme catalytic subunit 2	-1.1007	0.0019701
NQO1	NAD(P)H quinone dehydrogenase 1	-1.1001	0.0005988
REEP1	receptor accessory protein 1	-1.0999	0.0059872
CGGBP1	CGG triplet repeat binding protein 1	-1.0979	0.00045845
NLN	neurolysin	-1.096	0.0037116
KPNA1	karyopherin subunit alpha 1	-1.0955	0.00048749
NRN1L	neuritin 1 like	-1.094	0.001561
NUDCD1	NudC domain containing 1	-1.0934	0.0031999
CEP97	centrosomal protein 97	-1.0929	0.00043821
ANO10	anoctamin 10	-1.0926	0.0010927
TMEM42	transmembrane protein 42	-1.092	0.0035537
SLC27A3	solute carrier family 27 member 3	-1.0912	0.003489
NPRL2	"NPR2 like, GATOR1 complex subunit"	-1.091	0.00045845
TCTA	T cell leukemia translocation altered	-1.0905	0.0050379
COX6C	cytochrome c oxidase subunit 6C	-1.0901	0.0061572
OR7G1	olfactory receptor family 7 subfamily G member 1	-1.0898	0.00094591
TRHDE	thyrotropin releasing hormone degrading enzyme	-1.0889	0.028425
SEC22A	"SEC22 homolog A, vesicle trafficking protein"	-1.0872	0.00017046
KRTAP19-5	keratin associated protein 19-5	-1.087	0.0042624
TLE6	"TLE family member 6, subcortical maternal complex member"	-1.0869	0.004402
ZNF709	zinc finger protein 709	-1.086	0.00068795
RBM3	RNA binding motif protein 3	-1.0858	0.0018998
SULT1A2	sulfotransferase family 1A member 2	-1.0853	0.00038659
MAGI1	"membrane associated guanylate kinase, WW and PDZ domain containing 1"	-1.0851	0.0002476
TADA3	transcriptional adaptor 3	-1.085	0.004281
ASAP1-IT1	ASAP1 intronic transcript 1	-1.0841	0.0073773
CHMP2B	charged multivesicular body protein 2B	-1.0835	0.00099822
ANKRD30BP2	ankyrin repeat domain 30B pseudogene 2	-1.0832	0.002598
ACTG1P4	actin gamma 1 pseudogene 4	-1.0832	0.0045573
ANXA2R	annexin A2 receptor	-1.0822	0.029699
KIAA1143	KIAA1143	-1.0815	0.0016796
MMRN2	multimerin 2	-1.0806	0.00049635
CEP57	centrosomal protein 57	-1.0801	0.00031851
COL4A5	collagen type IV alpha 5 chain	-1.0788	0.0013683
POC1A	POC1 centriolar protein A	-1.0772	0.0021495
APOD	apolipoprotein D	-1.0758	0.038192
GMPPB	GDP-mannose pyrophosphorylase B	-1.0753	0.00049409
MYD88	MYD88 innate immune signal transduction adaptor	-1.0714	0.0022307
GNG4	G protein subunit gamma 4	-1.0712	0.034992
ZNF44	zinc finger protein 44	-1.071	0.01659
TMF1	TATA element modulatory factor 1	-1.0706	0.0010175
ATP6V1H	ATPase H+ transporting V1 subunit H	-1.0706	0.012406
SLC27A5	solute carrier family 27 member 5	-1.0705	0.0071336
ZNF844	zinc finger protein 844	-1.0699	0.00061015
ACBD7	acyl-CoA binding domain containing 7	-1.066	0.040581
GOLGB1	golgin B1	-1.0659	0.0011708
WDR6	WD repeat domain 6	-1.0659	0.0015677
RPUSD3	RNA pseudouridine synthase D3	-1.0654	0.0016848
LAMB2	laminin subunit beta 2	-1.0653	0.0080918
SACM1L	SAC1 like phosphatidylinositide phosphatase	-1.0647	0.00033887
MAP3K9	mitogen-activated protein kinase kinase kinase 9	-1.0618	0.0047054
ARIH2	ariadne RBR E3 ubiquitin protein ligase 2	-1.0607	0.00099822
KIAA1324L	KIAA1324 like	-1.0607	0.016351
RPL32	ribosomal protein L32	-1.0595	0.00061485
BFSP1	beaded filament structural protein 1	-1.0588	0.0047054
GORASP1	golgi reassembly stacking protein 1	-1.0585	0.00049342
POTEF	POTE ankyrin domain family member F	-1.0582	0.001378
ALG9	"ALG9 alpha-1,2-mannosyltransferase"	-1.0578	0.00053697
RPP14	ribonuclease P/MRP subunit p14	-1.0564	0.00084348
LOC148709	actin gamma 1 pseudogene	-1.0564	0.013155
CPOX	coproporphyrinogen oxidase	-1.056	0.00074348
WHAMMP1	"WAS protein homolog associated with actin, golgi membranes and microtubules pseudogene 1"	-1.0552	0.013934
FOXB1	forkhead box B1	-1.0548	0.045951
ITGA2	integrin subunit alpha 2	-1.0537	0.029704
PSMD6	"proteasome 26S subunit, non-ATPase 6"	-1.0532	0.00027086
CISH	cytokine inducible SH2 containing protein	-1.0527	0.00098279
XYLB	xylulokinase	-1.0524	0.00078523
NCAPD3	non-SMC condensin II complex subunit D3	-1.0518	0.00053951
PLEKHA7	pleckstrin homology domain containing A7	-1.0504	0.0014269
SPCS1	signal peptidase complex subunit 1	-1.0499	0.00020503
CLPSL1	colipase like 1	-1.0497	0.0050202
SIM2	SIM bHLH transcription factor 2	-1.0496	0.00069714
FBLL1	fibrillarin like 1	-1.0494	0.00070434
FAM107A	family with sequence similarity 107 member A	-1.0485	0.0017841
ROBO3	roundabout guidance receptor 3	-1.0485	0.0029455
HMMR	hyaluronan mediated motility receptor	-1.0483	0.0079169
UBA7	ubiquitin like modifier activating enzyme 7	-1.0477	0.0040199
UBE4A	ubiquitination factor E4A	-1.0475	0.00040979
VILL	villin like	-1.0471	0.0011457
FYCO1	FYVE and coiled-coil domain autophagy adaptor 1	-1.0467	0.0019701
MYH10	myosin heavy chain 10	-1.043	0.0010882
PUF60	poly(U) binding splicing factor 60	-1.0409	0.016019
ZNF35	zinc finger protein 35	-1.038	0.00052032
SAP30L-AS1	SAP30L antisense RNA 1 (head to head)	-1.0366	0.0087376
FAM118B	family with sequence similarity 118 member B	-1.0355	0.0018599
SCX	scleraxis bHLH transcription factor	-1.0347	0.0065279
PABPC4L	poly(A) binding protein cytoplasmic 4 like	-1.034	0.029193
EDEM1	ER degradation enhancing alpha-mannosidase like protein 1	-1.0339	0.0012366
PXK	PX domain containing serine/threonine kinase like	-1.0335	0.019208
EPHA1-AS1	EPHA1 antisense RNA 1	-1.0329	0.014285
ZNF569	zinc finger protein 569	-1.0325	0.0024712
SETMAR	SET domain and mariner transposase fusion gene	-1.0323	0.00046067
PTS	6-pyruvoyltetrahydropterin synthase	-1.0322	0.00043009
PTDSS1	phosphatidylserine synthase 1	-1.0307	0.039215
IFRD2	interferon related developmental regulator 2	-1.0305	0.00030758
FOXP1	forkhead box P1	-1.0304	0.0012253
SFTPC	surfactant protein C	-1.0301	0.0024517
CENPV	centromere protein V	-1.0295	0.039972
SLC25A38	solute carrier family 25 member 38	-1.0274	0.00084348
PELI1	pellino E3 ubiquitin protein ligase 1	-1.0271	0.0038883
CCDC58	coiled-coil domain containing 58	-1.0271	0.0042575
CWC15	CWC15 spliceosome associated protein homolog	-1.0265	0.0020962
LRCOL1	leucine rich colipase like 1	-1.026	0.0073773
FAM13B	family with sequence similarity 13 member B	-1.0256	0.0097304
EEF1D	eukaryotic translation elongation factor 1 delta	-1.025	0.012528
ALAS1	5'-aminolevulinate synthase 1	-1.0245	0.00088143
ARL13B	ADP ribosylation factor like GTPase 13B	-1.0236	0.003162
PCNP	PEST proteolytic signal containing nuclear protein	-1.0224	0.00043009
NLRX1	NLR family member X1	-1.0218	0.0055776
MED17	mediator complex subunit 17	-1.0215	0.00058618
TTYH3	tweety family member 3	-1.0208	0.0046683
RYR3	ryanodine receptor 3	-1.0207	0.00073747
RRN3P2	RRN3 pseudogene 2	-1.0206	0.0034887
KCTD19	potassium channel tetramerization domain containing 19	-1.0187	0.0012993
RNF19A	"ring finger protein 19A, RBR E3 ubiquitin protein ligase"	-1.0182	0.0021319
DLX1	distal-less homeobox 1	-1.0169	0.0002781
CHSY1	chondroitin sulfate synthase 1	-1.0168	0.0008627
CAPN7	calpain 7	-1.0168	0.0037339
GPR150	G protein-coupled receptor 150	-1.0166	0.023708
TUSC2	"tumor suppressor 2, mitochondrial calcium regulator"	-1.0162	0.003267
RAB2A	"RAB2A, member RAS oncogene family"	-1.0149	0.00017685
QRICH1	glutamine rich 1	-1.014	0.00055652
EXOG	exo/endonuclease G	-1.0113	0.0039465
ZNF621	zinc finger protein 621	-1.0107	0.00049635
IMPDH2	inosine monophosphate dehydrogenase 2	-1.0104	0.0014273
ATG7	autophagy related 7	-1.0098	0.0037022
PREX2	"phosphatidylinositol-3,4,5-trisphosphate dependent Rac exchange factor 2"	-1.0093	0.008043
UBXN2B	UBX domain protein 2B	-1.0091	0.0086609
KMT2A	lysine methyltransferase 2A	-1.0084	0.00020503
TREX1	three prime repair exonuclease 1	-1.0072	0.037697
TRAK1	trafficking kinesin protein 1	-1.0068	0.0022808
PARP14	poly(ADP-ribose) polymerase family member 14	-1.0065	0.0012948
LYPLA1	lysophospholipase 1	-1.0047	0.0043276
RPUSD4	RNA pseudouridine synthase D4	-1.0042	0.00034044
MMP17	matrix metallopeptidase 17	-1.0034	0.0061775
REXO2	RNA exonuclease 2	-1.0033	0.00091674
ZBTB18	zinc finger and BTB domain containing 18	-1.0029	0.00067243
PEAR1	platelet endothelial aggregation receptor 1	-1.002	0.04609
CUL5	cullin 5	-1.0019	0.00083953
